# Supplementary material for: Conformationally restricted glutamic acid analogues: stereoisomers of 1-aminospiro[3.3]heptane-1,6-dicarboxylic acid
Source: Royal Society of Chemistry journal article supplement (doi:10.1039/c3ra47725h), 2014-01-01
Supplement: c3ra47725h1.pdf [file c3ra47725h1.pdf]

# Conformationally restricted glutamic acid analogues: stereoisomers of 1-aminospiro[3.3]heptane-1,6-dicarboxylic acid

*Anton V. Chernykh,<sup>a, b</sup> Dmytro S. Radchenko,<sup>a, c</sup> Oleksandr O. Grygorenko,<sup>c</sup>*

*Dmitriy M. Volochnyuk,<sup>b</sup> Svitlana V. Shishkina,<sup>d</sup> Oleg V. Shishkin<sup>d</sup> and Igor V. Komarov<sup>c,\*</sup>*

*<sup>a</sup> Enamine Ltd., Alexandra Matrosova Street 23, Kyiv 01103, Ukraine*

*<sup>b</sup> Institute of Organic Chemistry, National Academy of Sciences of Ukraine, Murmanska 5, Kyiv  
02660, Ukraine*

*<sup>c</sup> Taras Shevchenko National University of Kyiv, Volodymyrska Street 60, Kyiv 01601, Ukraine*

*E-mail: [ik214@yahoo.com](mailto:ik214@yahoo.com)*

*<sup>d</sup> STC “Institute for Single Crystals”, National Academy of Sciences of Ukraine, 60 Lenina ave.,  
61001 Kharkiv, Ukraine*

## Table of contents.

|     |                                                                      |     |
|-----|----------------------------------------------------------------------|-----|
| 1.  | $^1\text{H}$ NMR spectrum of the compound <b>8</b>                   | S5  |
| 2.  | $^{13}\text{C}$ NMR spectrum of the compound <b>8</b>                | S6  |
| 3.  | $^1\text{H}$ NMR spectrum of the compound <b>13</b>                  | S7  |
| 4.  | $^{13}\text{C}$ NMR spectrum of the compound <b>13</b>               | S8  |
| 5.  | $^{31}\text{P}$ NMR spectrum of the compound <b>13</b>               | S9  |
| 6.  | $^1\text{H}$ NMR spectrum of the compound <b>15</b>                  | S10 |
| 7.  | $^{13}\text{C}$ NMR spectrum of the compound <b>15</b>               | S11 |
| 8.  | $^1\text{H}$ NMR spectrum of the compound <b>9</b>                   | S12 |
| 9.  | $^{13}\text{C}$ NMR spectrum of the compound <b>9</b>                | S13 |
| 10. | $^1\text{H}$ NMR spectrum of the compound <b>11a</b>                 | S14 |
| 11. | $^{13}\text{C}$ NMR spectrum of the compound <b>11a</b>              | S15 |
| 12. | NOE spectrum of the compound <b>11a</b>                              | S16 |
| 13. | HMBC spectrum of the compound <b>11a</b>                             | S17 |
| 14. | $^1\text{H}$ - $^1\text{H}$ COSY spectrum of the compound <b>11a</b> | S18 |
| 15. | NOESY spectrum of the compound <b>11a</b>                            | S19 |
| 16. | NOESY spectrum of the compound <b>11a</b> (fragment)                 | S20 |
| 17. | $^1\text{H}$ NMR spectrum of the compound <b>11b</b>                 | S21 |
| 18. | $^{13}\text{C}$ NMR spectrum of the compound <b>11b</b>              | S22 |
| 19. | NOE spectrum of the compound <b>11b</b>                              | S23 |
| 20. | $^1\text{H}$ - $^1\text{H}$ COSY spectrum of the compound <b>11b</b> | S24 |
| 21. | HMBC spectrum of the compound <b>11b</b>                             | S25 |
| 22. | NOESY spectrum of the compound <b>11b</b>                            | S26 |
| 23. | NOESY spectrum of the compound <b>11b</b> (fragment)                 | S27 |
| 24. | $^1\text{H}$ NMR spectrum of the compound <b>16a</b>                 | S28 |
| 25. | $^{13}\text{C}$ NMR spectrum of the compound <b>16a</b>              | S29 |

|     |                                                             |     |
|-----|-------------------------------------------------------------|-----|
| 26. | $^1\text{H}$ NMR spectrum of the compound <b>16b</b>        | S30 |
| 27. | $^{13}\text{C}$ NMR spectrum of the compound <b>16b</b>     | S31 |
| 28. | $^1\text{H}$ NMR spectrum of the compound <b>16c</b>        | S32 |
| 29. | $^{13}\text{C}$ NMR spectrum of the compound <b>16c</b>     | S33 |
| 30. | $^1\text{H}$ NMR spectrum of the compound <b>16d</b>        | S34 |
| 31. | $^{13}\text{C}$ NMR spectrum of the compound <b>16d</b>     | S35 |
| 32. | $^1\text{H}$ NMR spectrum of the compound <b>1a</b> ·HCl    | S36 |
| 33. | $^{13}\text{C}$ NMR spectrum of the compound <b>1a</b> ·HCl | S37 |
| 34. | $^1\text{H}$ NMR spectrum of the compound <b>1b</b> ·HCl    | S38 |
| 35. | $^{13}\text{C}$ NMR spectrum of the compound <b>1b</b> ·HCl | S39 |
| 36. | $^1\text{H}$ NMR spectrum of the compound <b>1c</b> ·HCl    | S40 |
| 37. | $^{13}\text{C}$ NMR spectrum of the compound <b>1c</b> ·HCl | S41 |
| 38. | $^1\text{H}$ NMR spectrum of the compound <b>1d</b> ·HCl    | S42 |
| 39. | $^{13}\text{C}$ NMR spectrum of the compound <b>1d</b> ·HCl | S43 |
| 40. | $^1\text{H}$ NMR spectrum of the compound <b>18a</b>        | S44 |
| 41. | $^{13}\text{C}$ NMR spectrum of the compound <b>18a</b>     | S45 |
| 42. | $^1\text{H}$ NMR spectrum of the compound <b>18b</b>        | S46 |
| 43. | $^{13}\text{C}$ NMR spectrum of the compound <b>18b</b>     | S47 |
| 44. | $^1\text{H}$ NMR spectrum of the compound <b>18c</b>        | S48 |
| 45. | $^{13}\text{C}$ NMR spectrum of the compound <b>18c</b>     | S49 |
| 46. | $^1\text{H}$ NMR spectrum of the compound <b>18d</b>        | S50 |
| 47. | $^{13}\text{C}$ NMR spectrum of the compound <b>18d</b>     | S51 |
| 48. | $^{13}\text{C}$ DEPT spectrum of the compound <b>18d</b>    | S52 |
| 49. | $^1\text{H}$ NMR spectrum of the compound <b>19c</b>        | S53 |
| 50. | $^{13}\text{C}$ NMR spectrum of the compound <b>19c</b>     | S54 |
| 51. | Stereochemical assignments of <b>1a-d</b>                   | S55 |

|                                                                                                                |     |
|----------------------------------------------------------------------------------------------------------------|-----|
| 52. Table S1. Crystallographic data and experimental parameters<br>for the compound <b>13</b> and <b>18a-c</b> | S56 |
| 53. ORTEP diagrams of the compounds <b>18a-c</b>                                                               | S57 |

<sup>1</sup>H NMR spectrum of the compound **8**

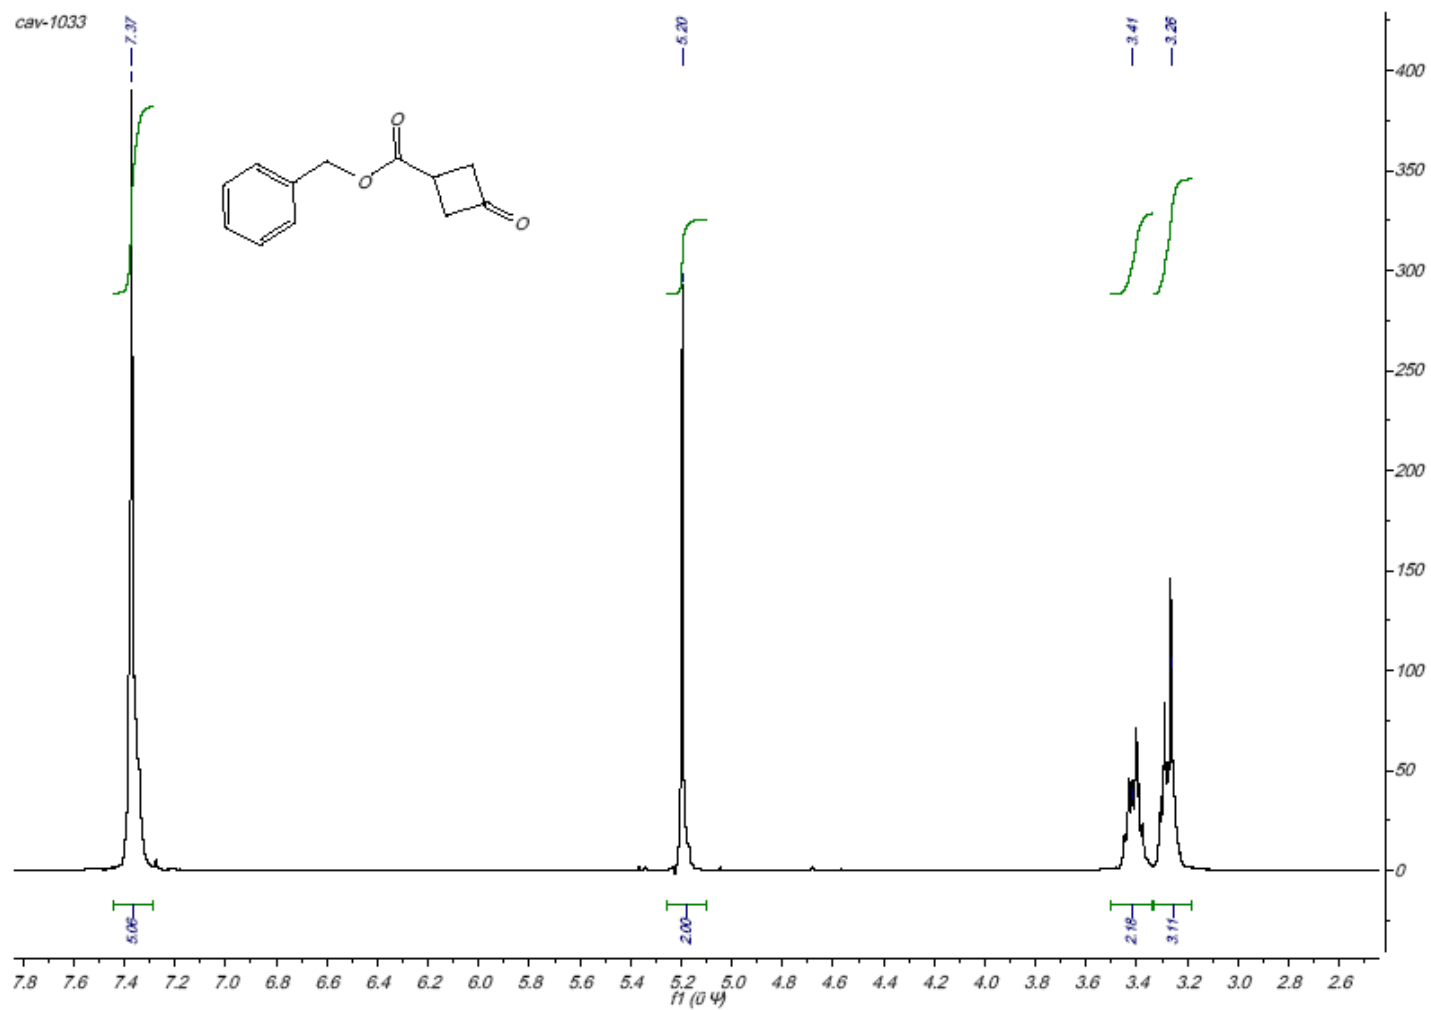

$^{13}\text{C}$  NMR spectrum of the compound **8**

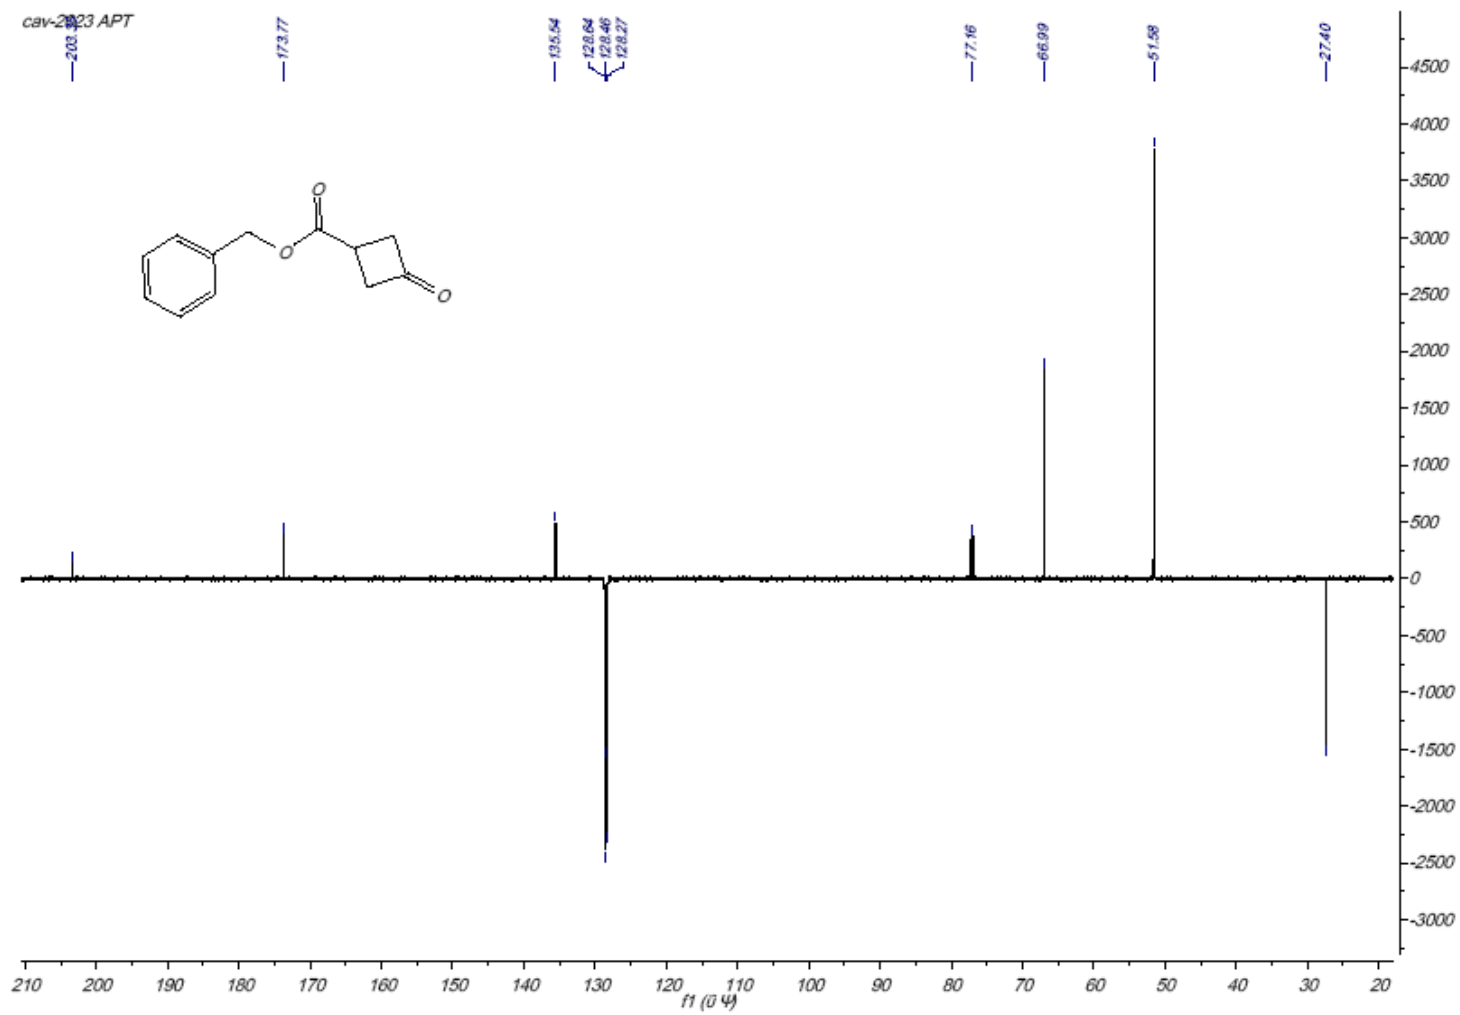

<sup>1</sup>H NMR spectrum of the compound **13**

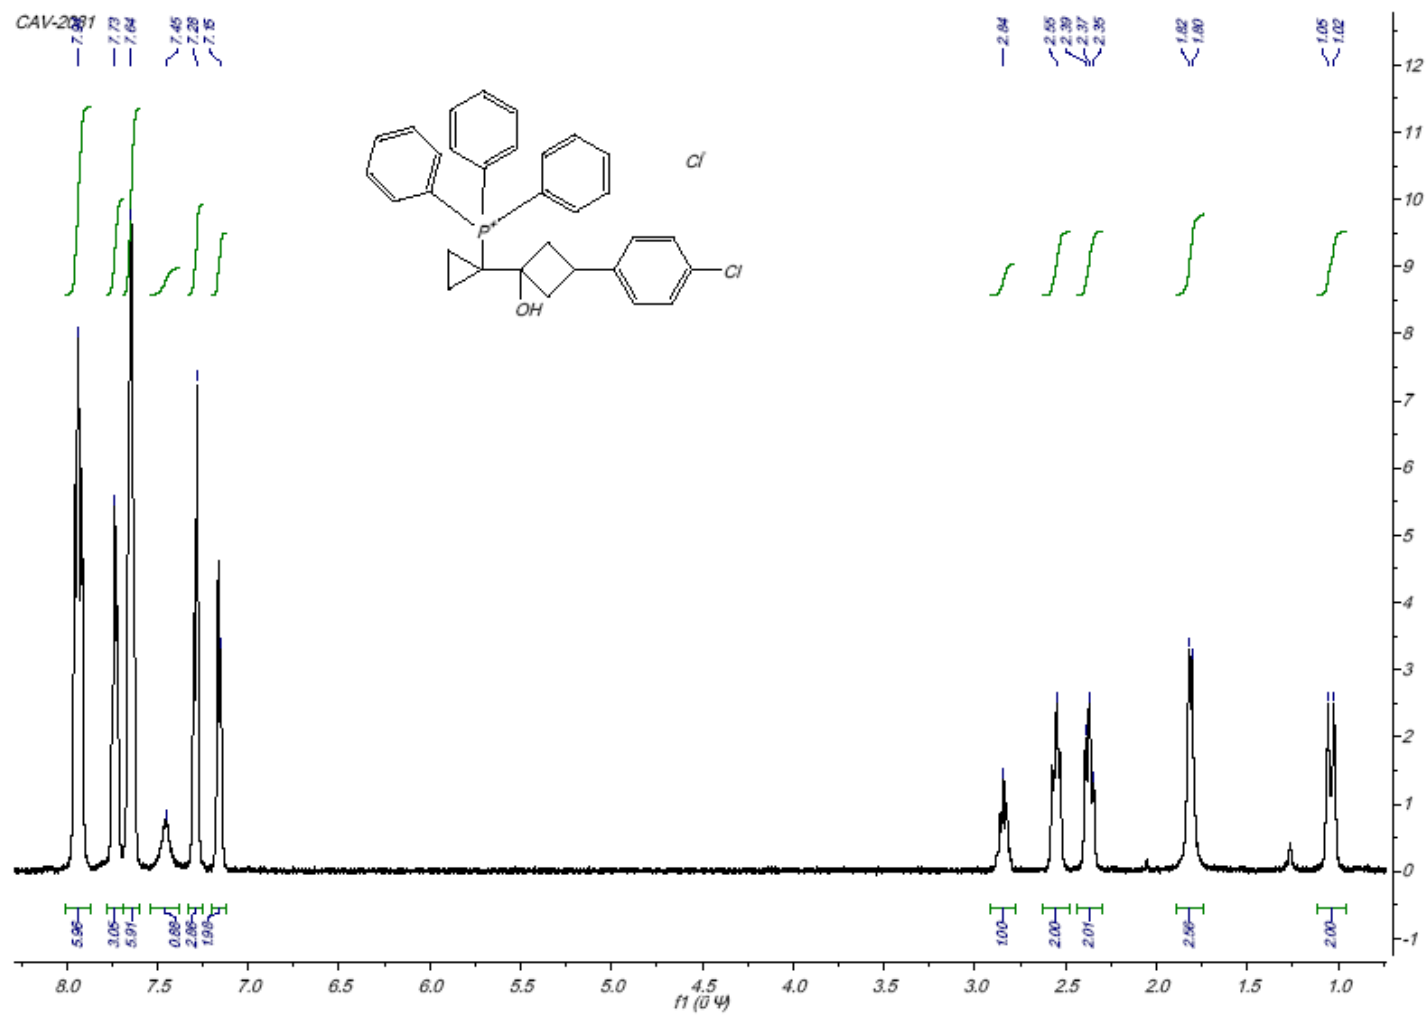

$^{13}\text{C}$  NMR spectrum of the compound **13**

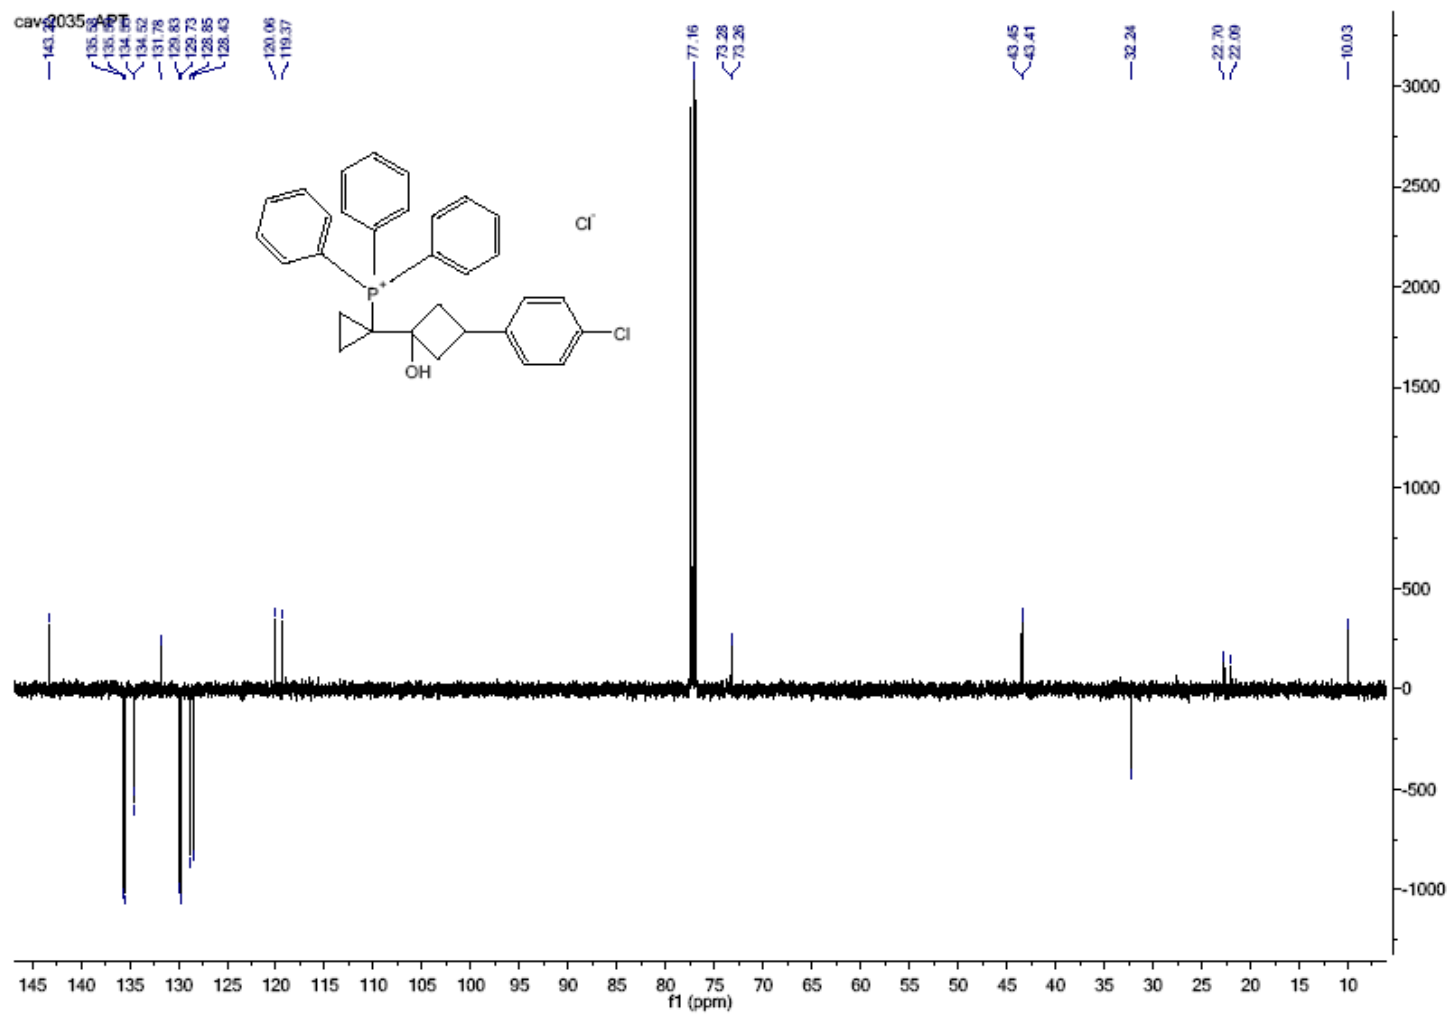



$^{31}\text{P}$  NMR spectrum of the compound **13**

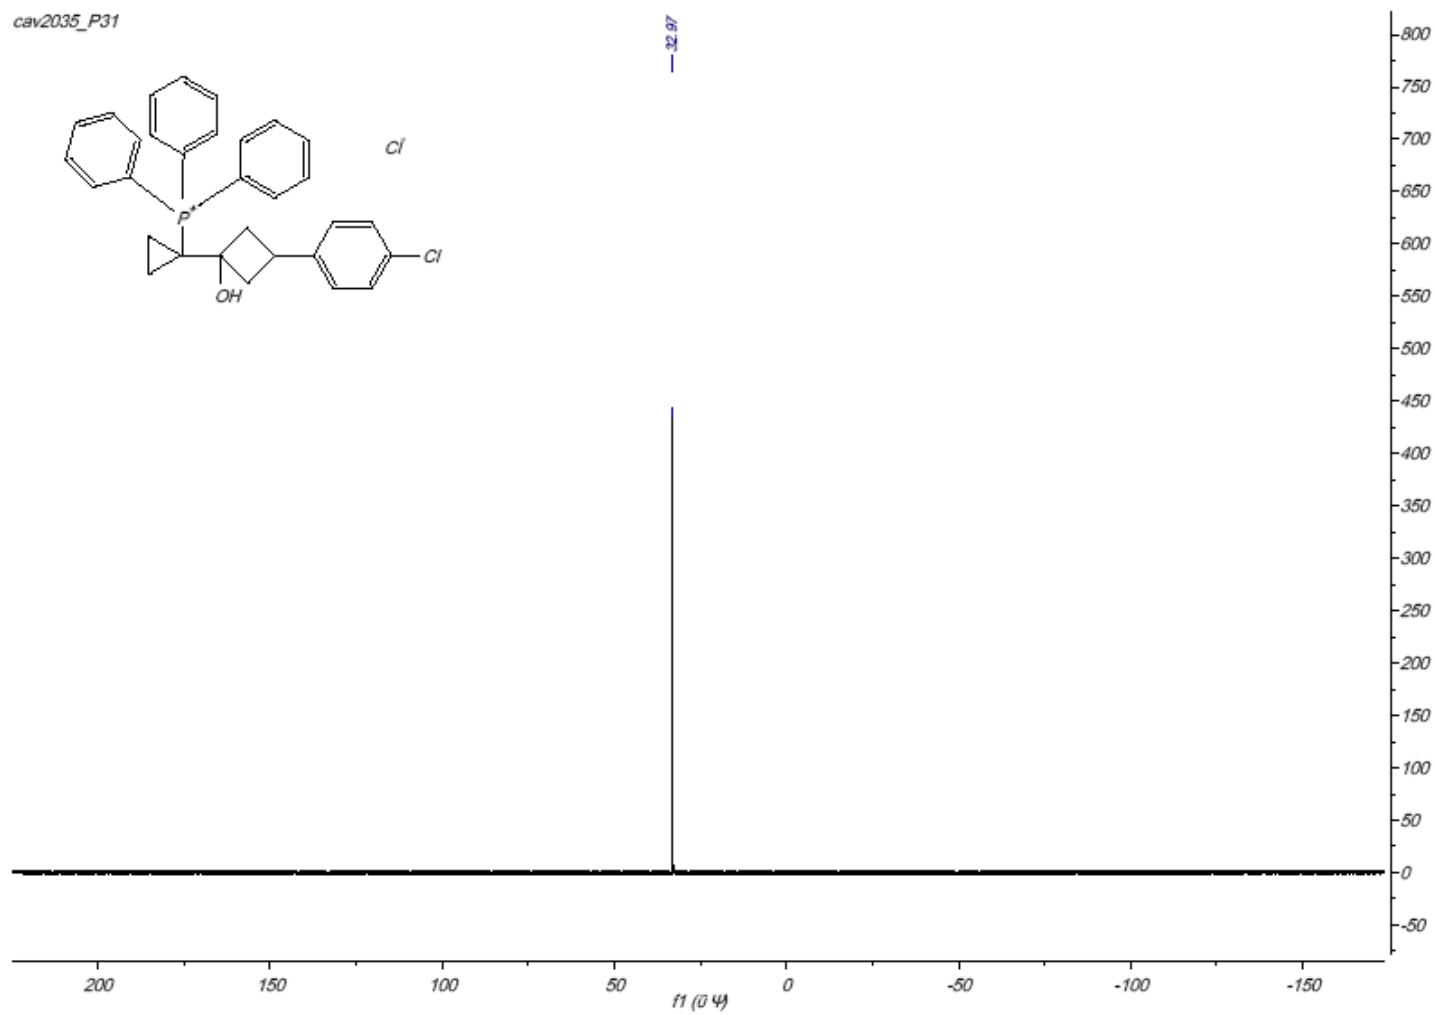

$^1\text{H}$  NMR spectrum of the compound **15**

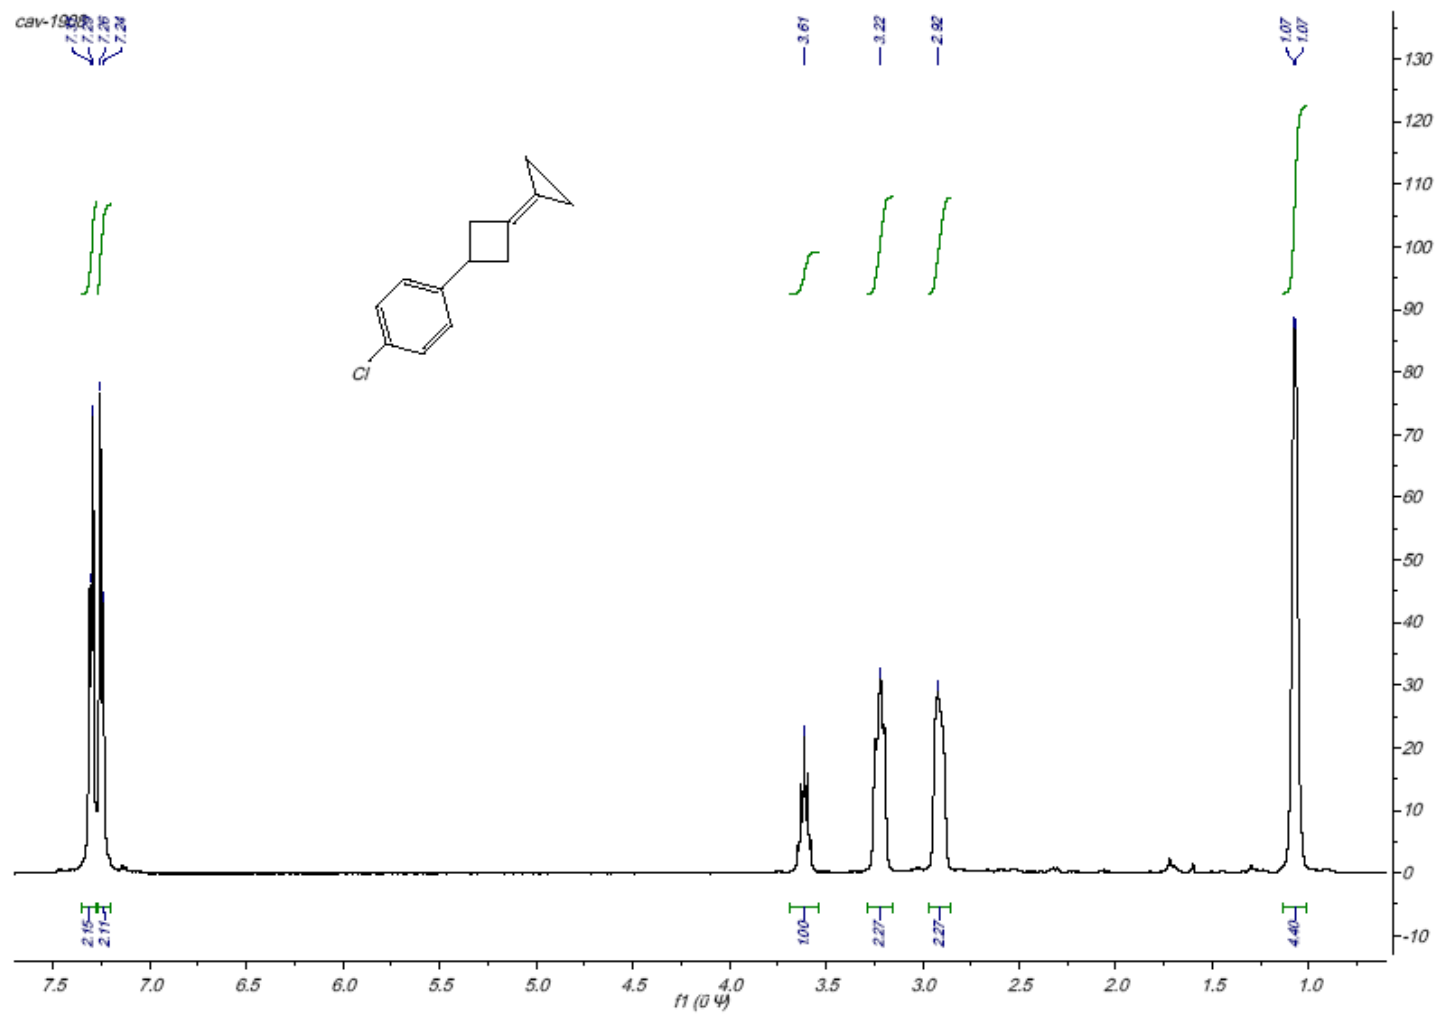

$^{13}\text{C}$  NMR spectrum of the compound **15**

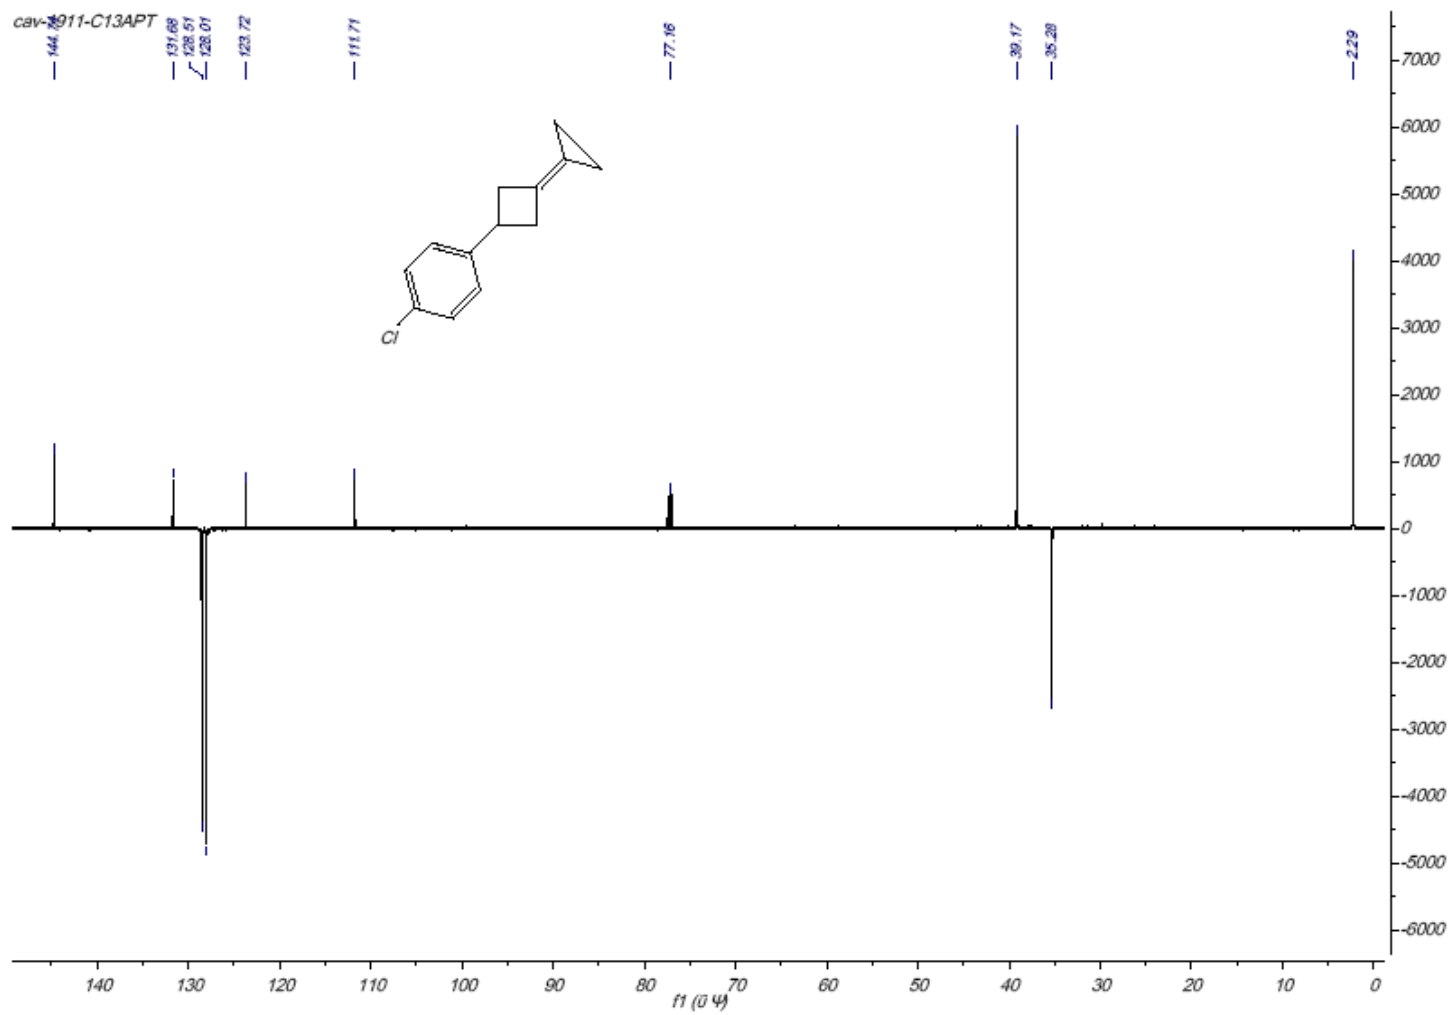

<sup>1</sup>H NMR spectrum of the compound **9**

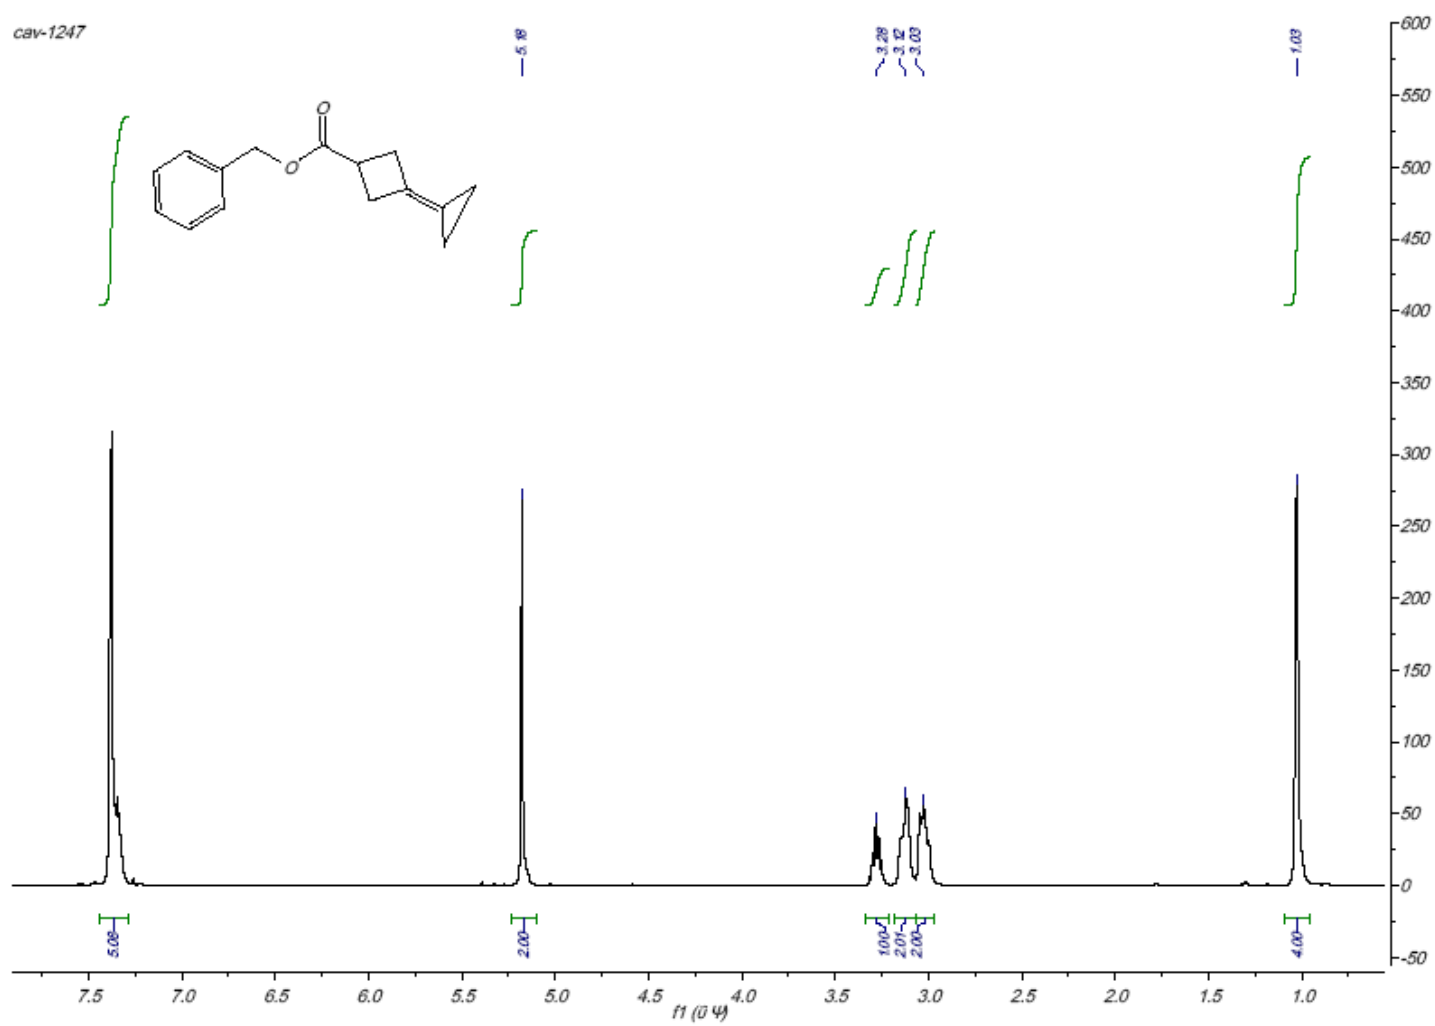

$^{13}\text{C}$  NMR spectrum of the compound **9**

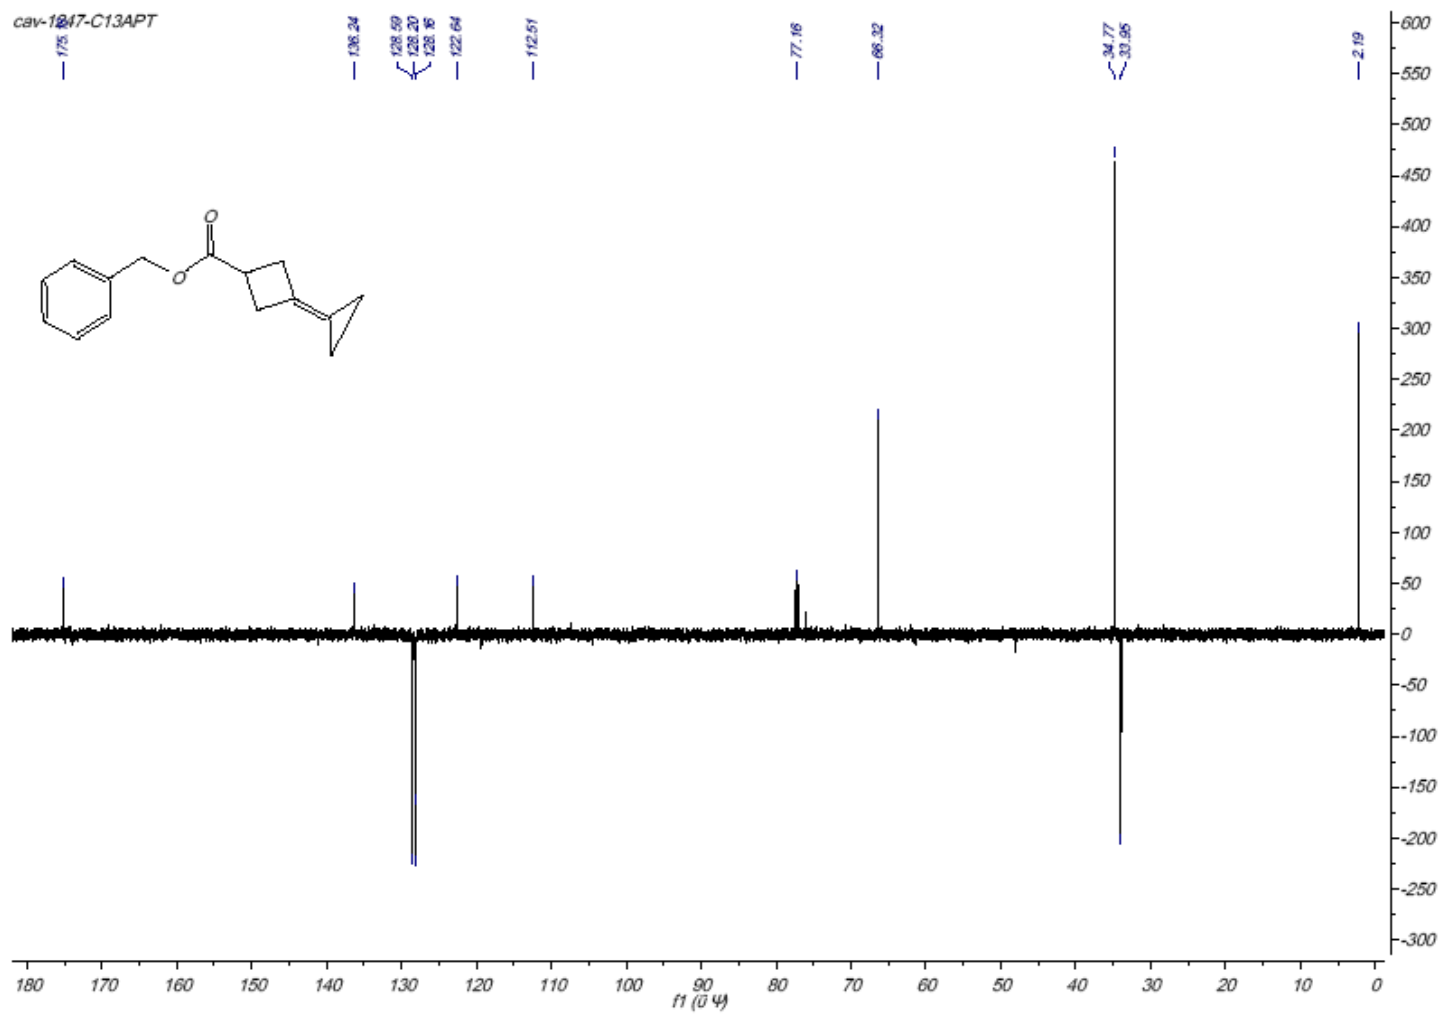

<sup>1</sup>H NMR spectrum of the compound **11a**

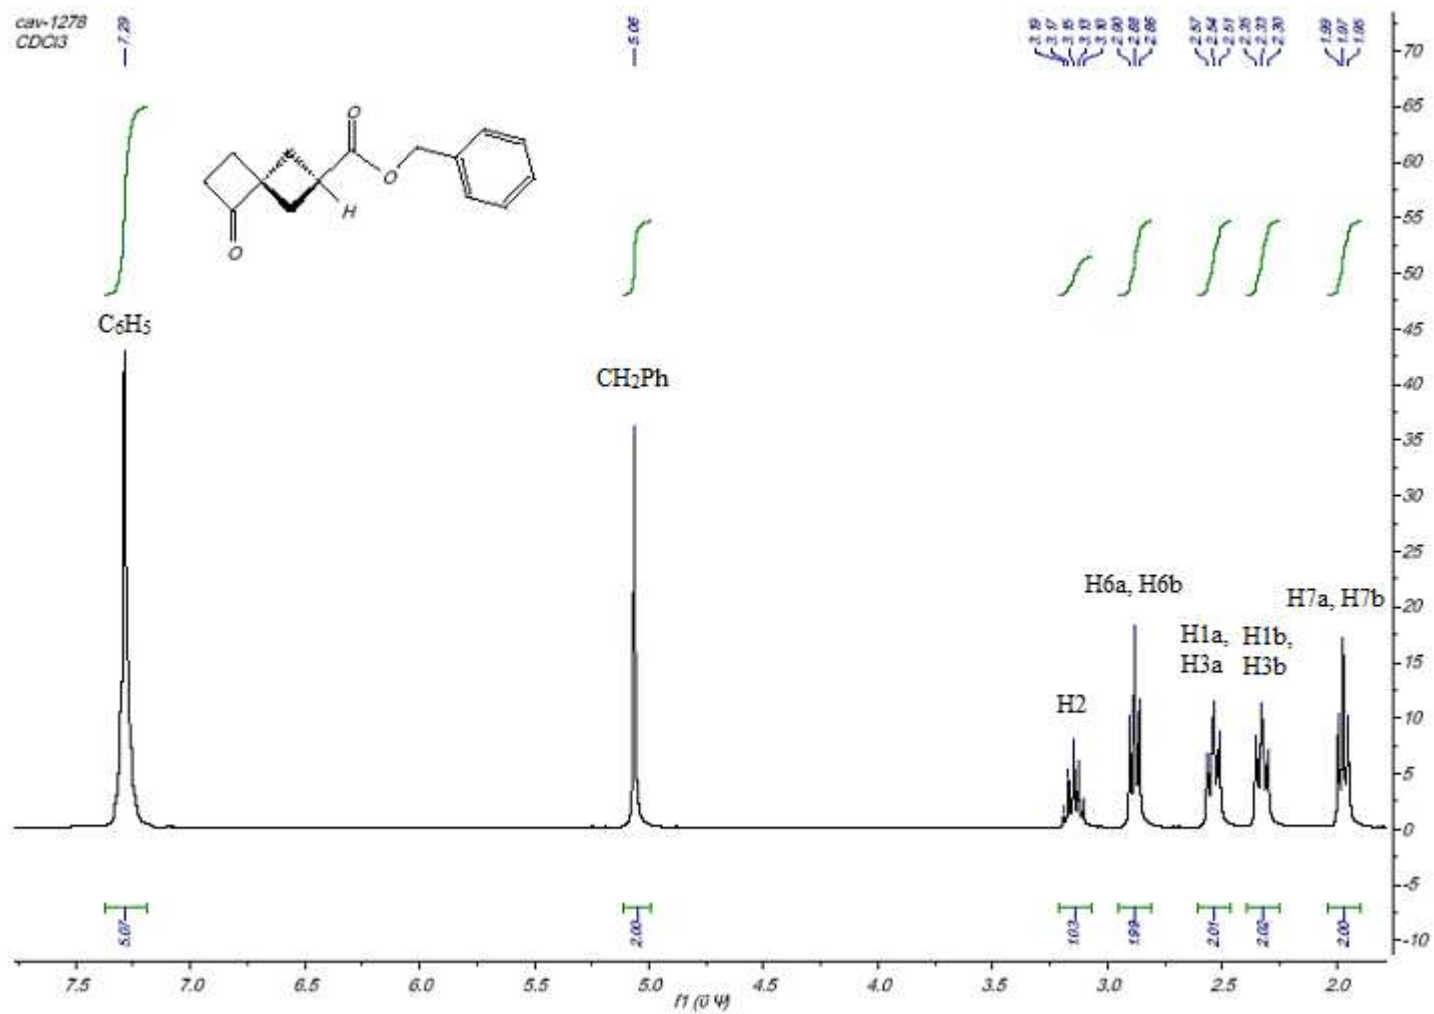

<sup>13</sup>C NMR spectrum of the compound **11a**

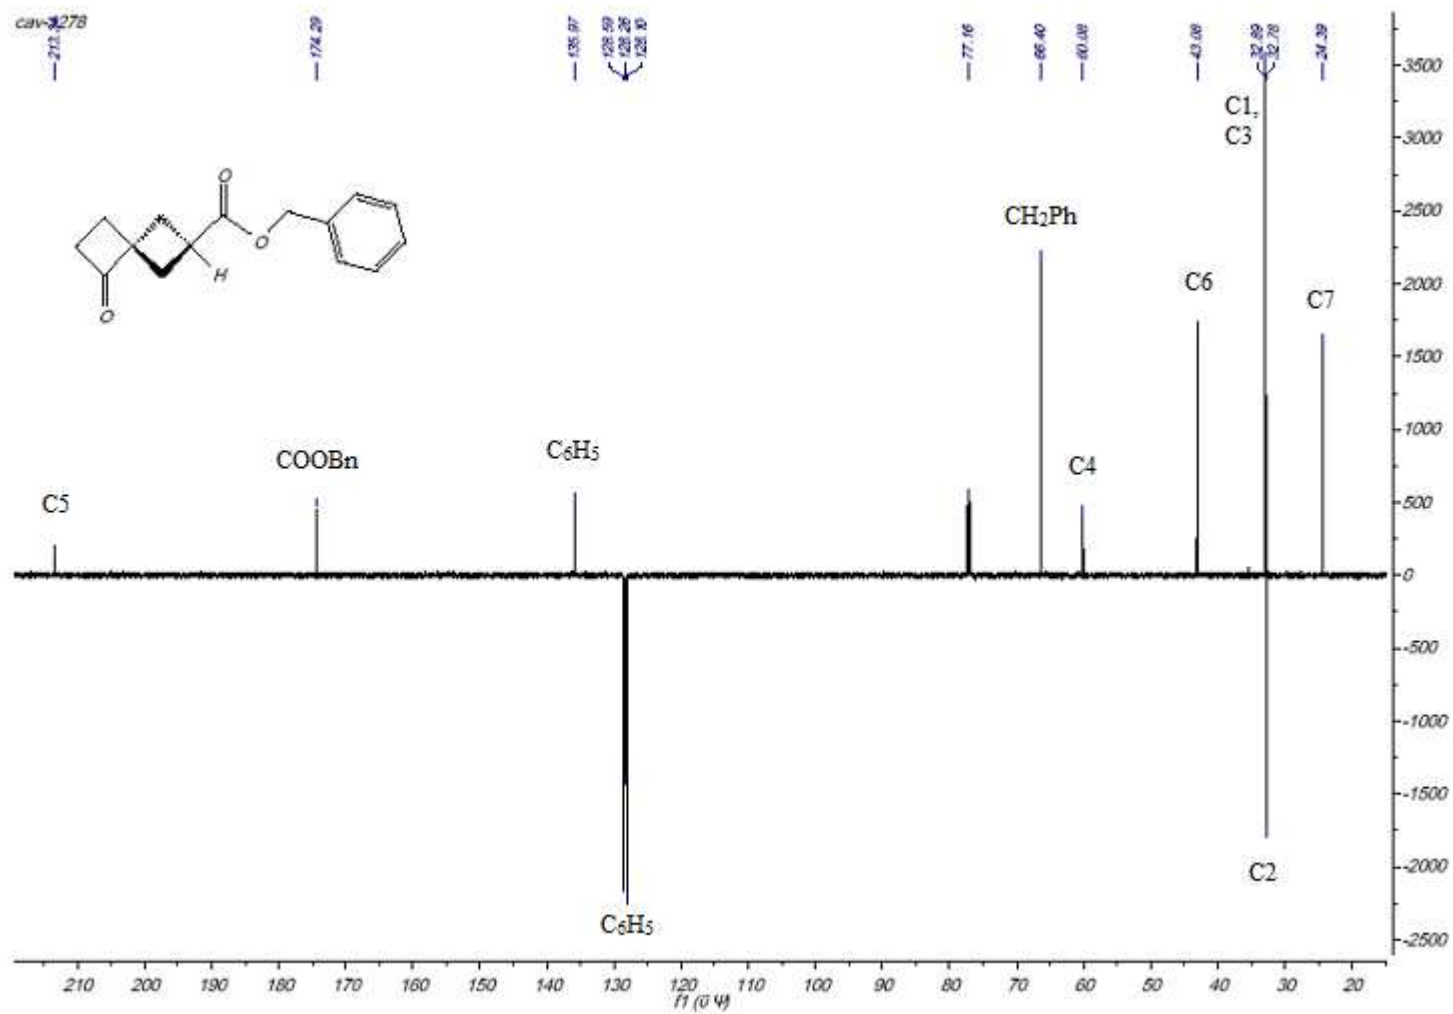

# NOE spectrum of the compound **11a**

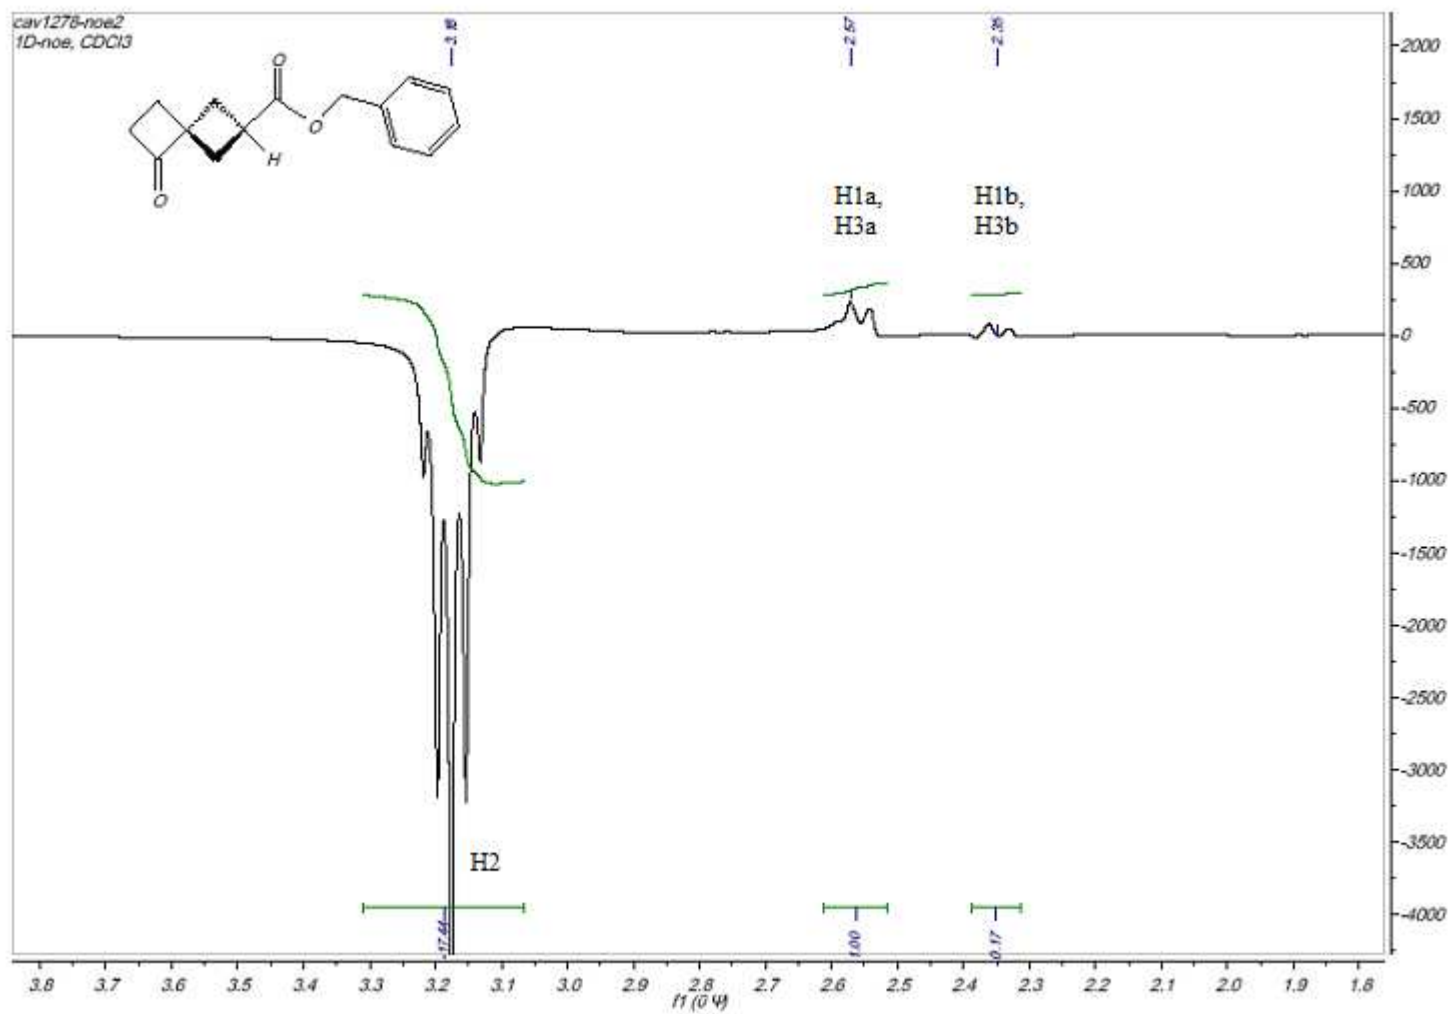





$^1\text{H}$ - $^1\text{H}$  COSY spectrum of the compound **11a**

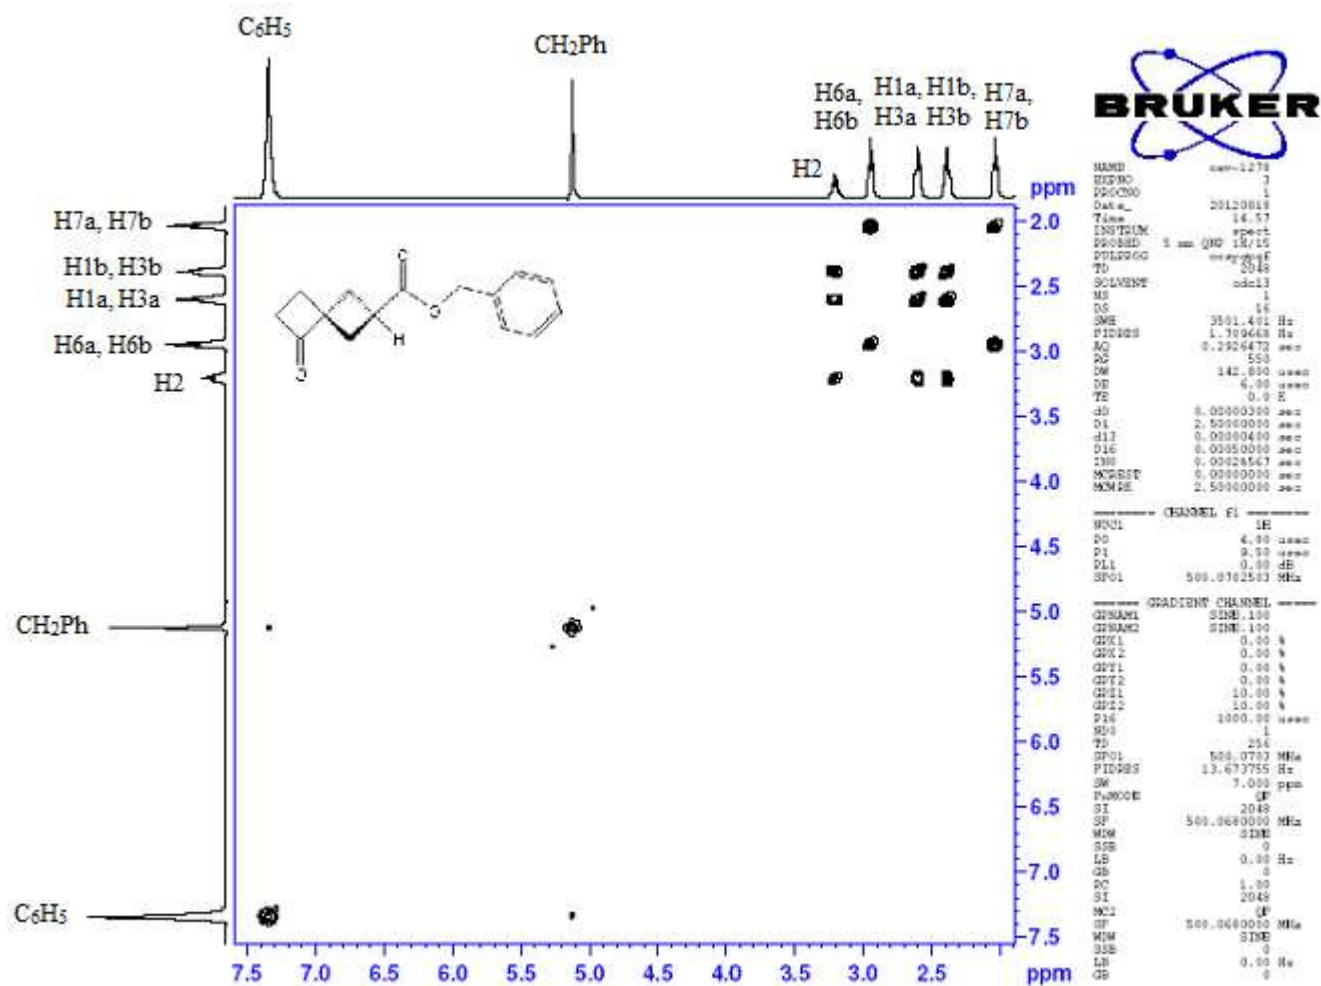

### NOESY spectrum of the compound 11a

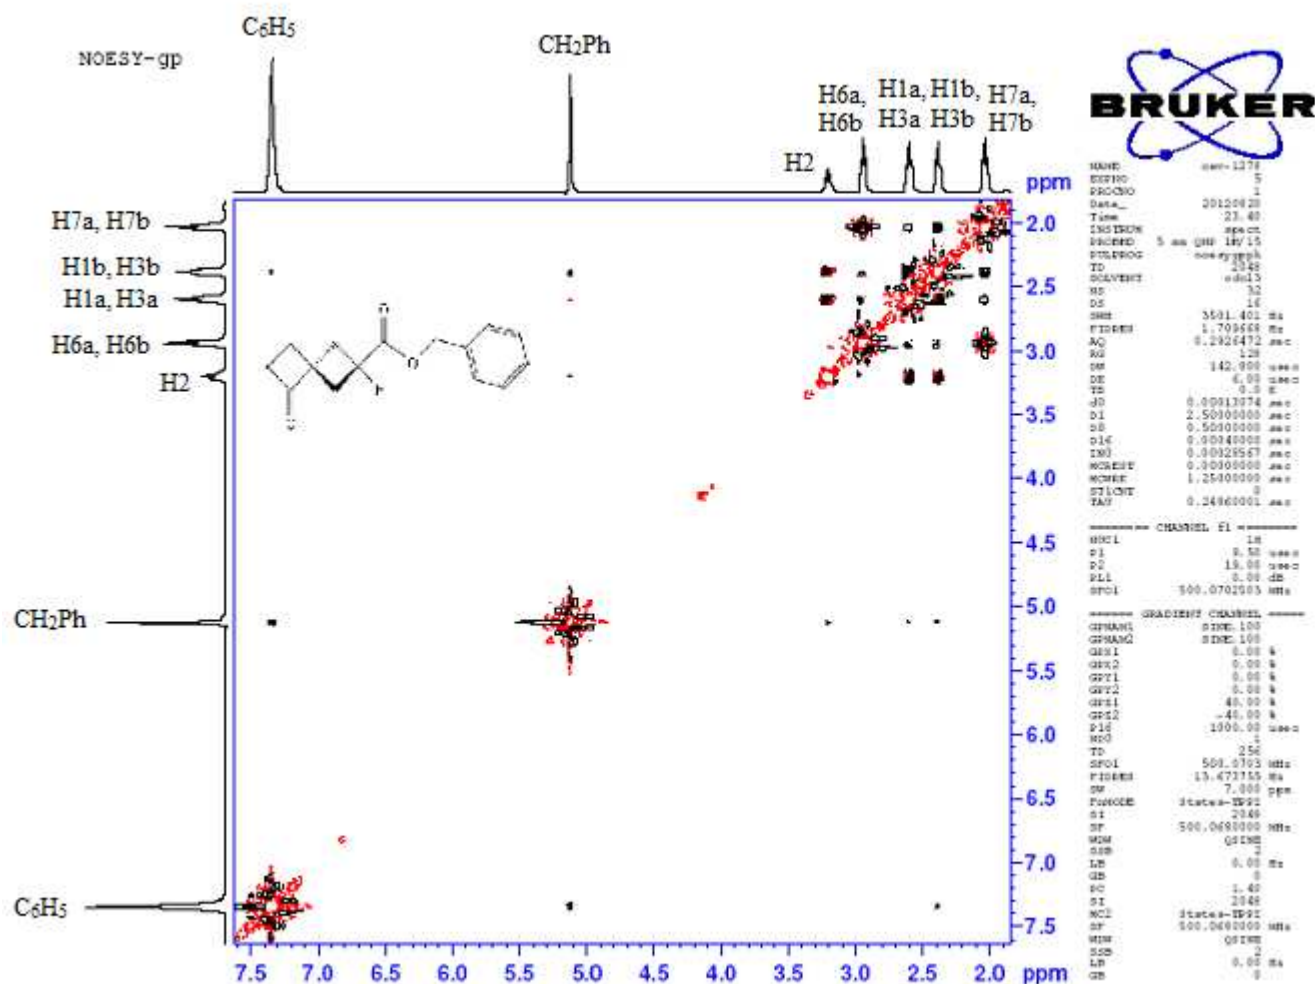

NOESY spectrum of the compound **11a** (fragment)

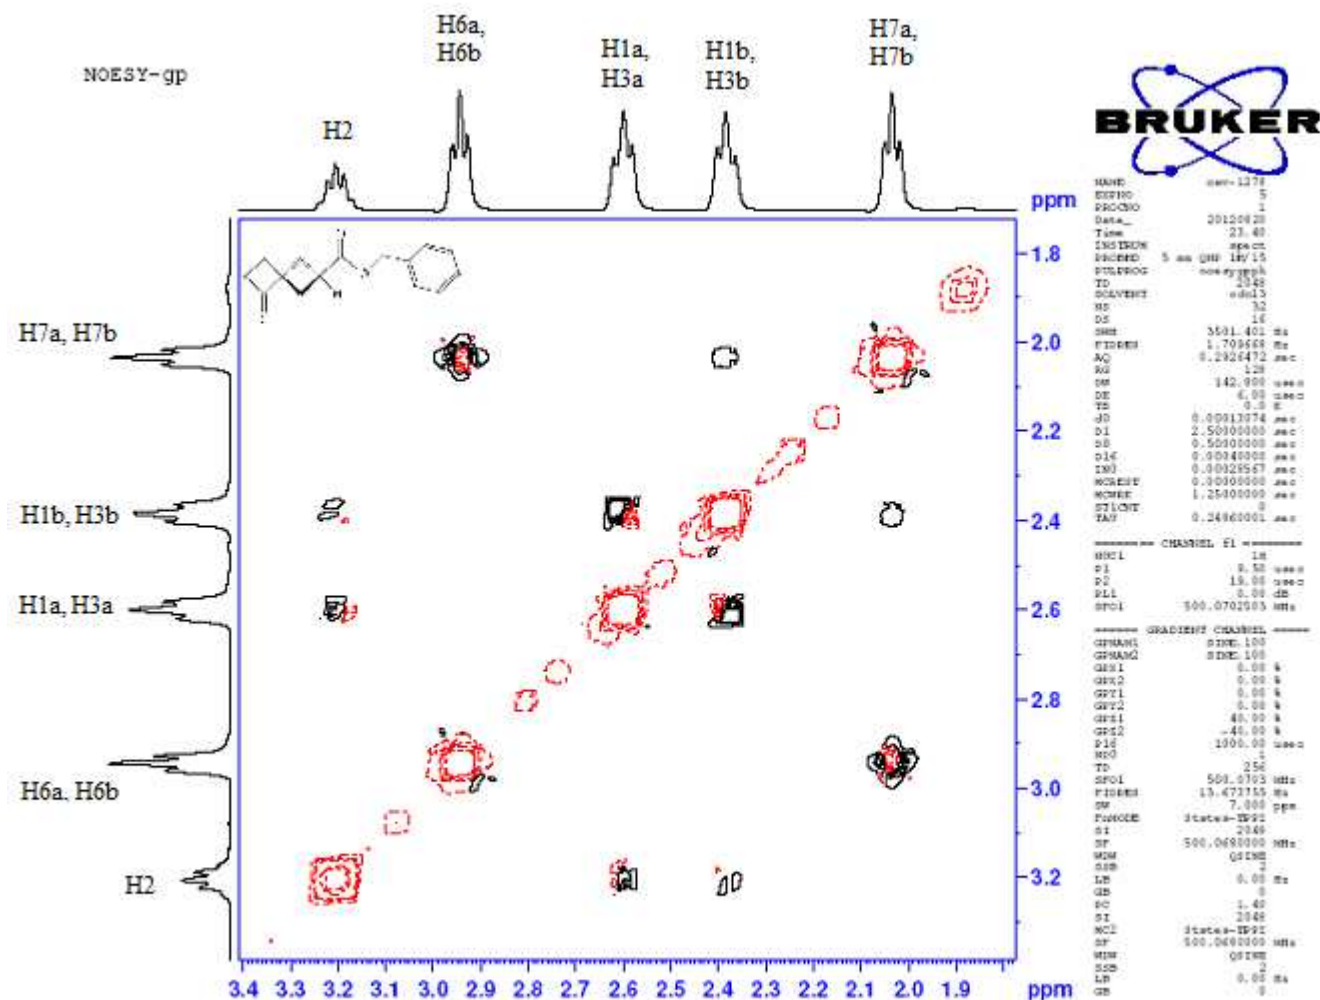

$^1\text{H}$  NMR spectrum of the compound **11b**

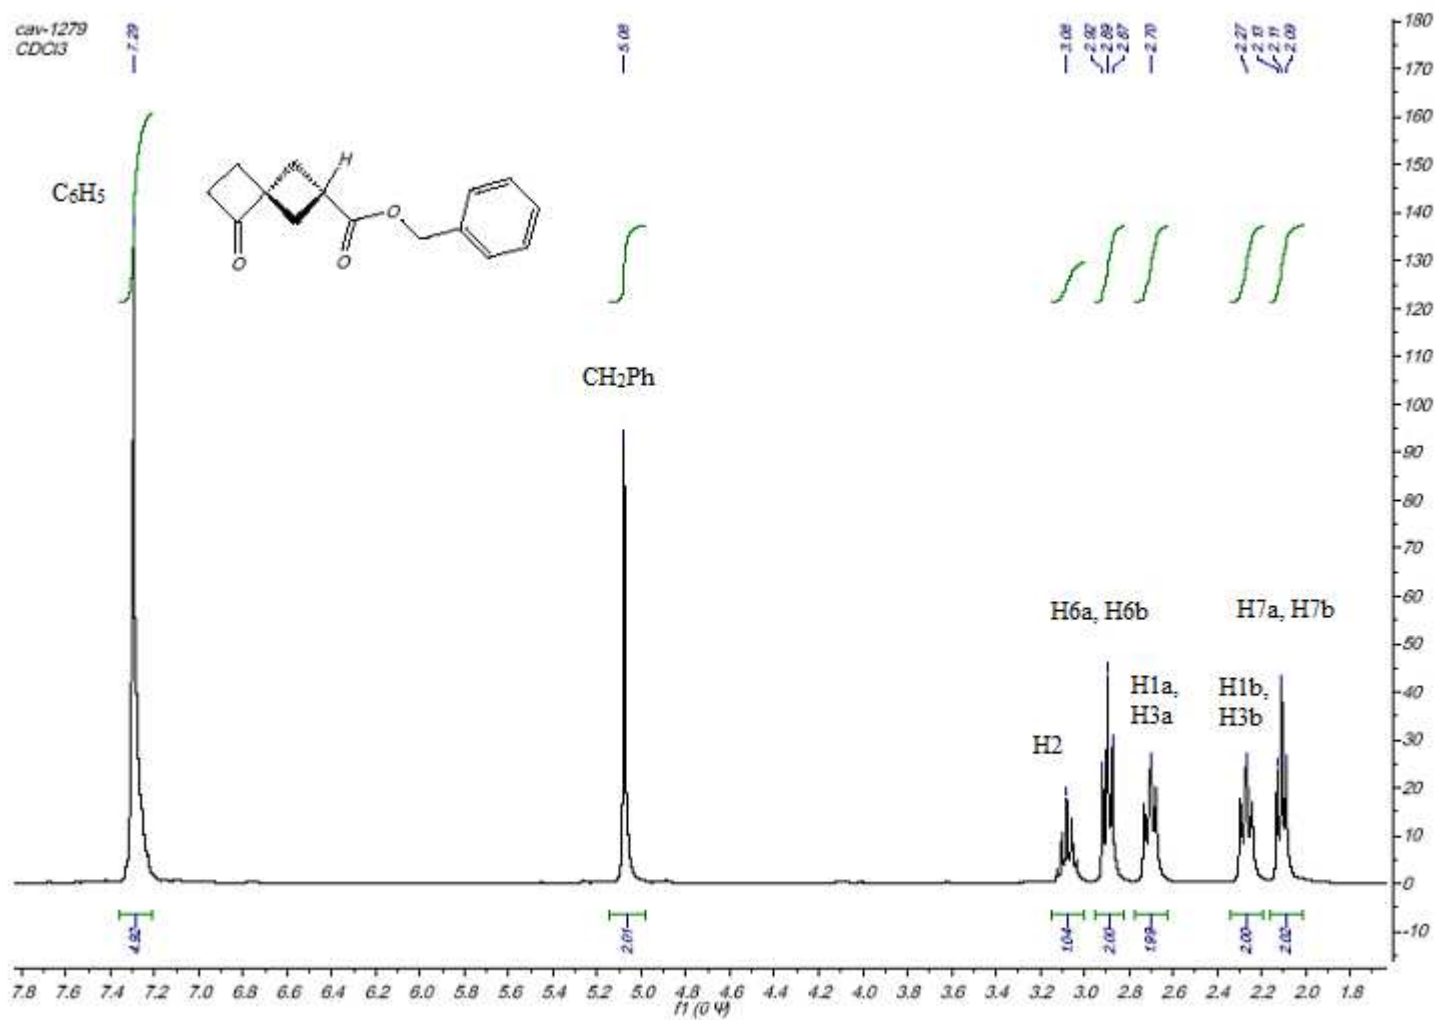

$^{13}\text{C}$  NMR spectrum of the compound **11b**

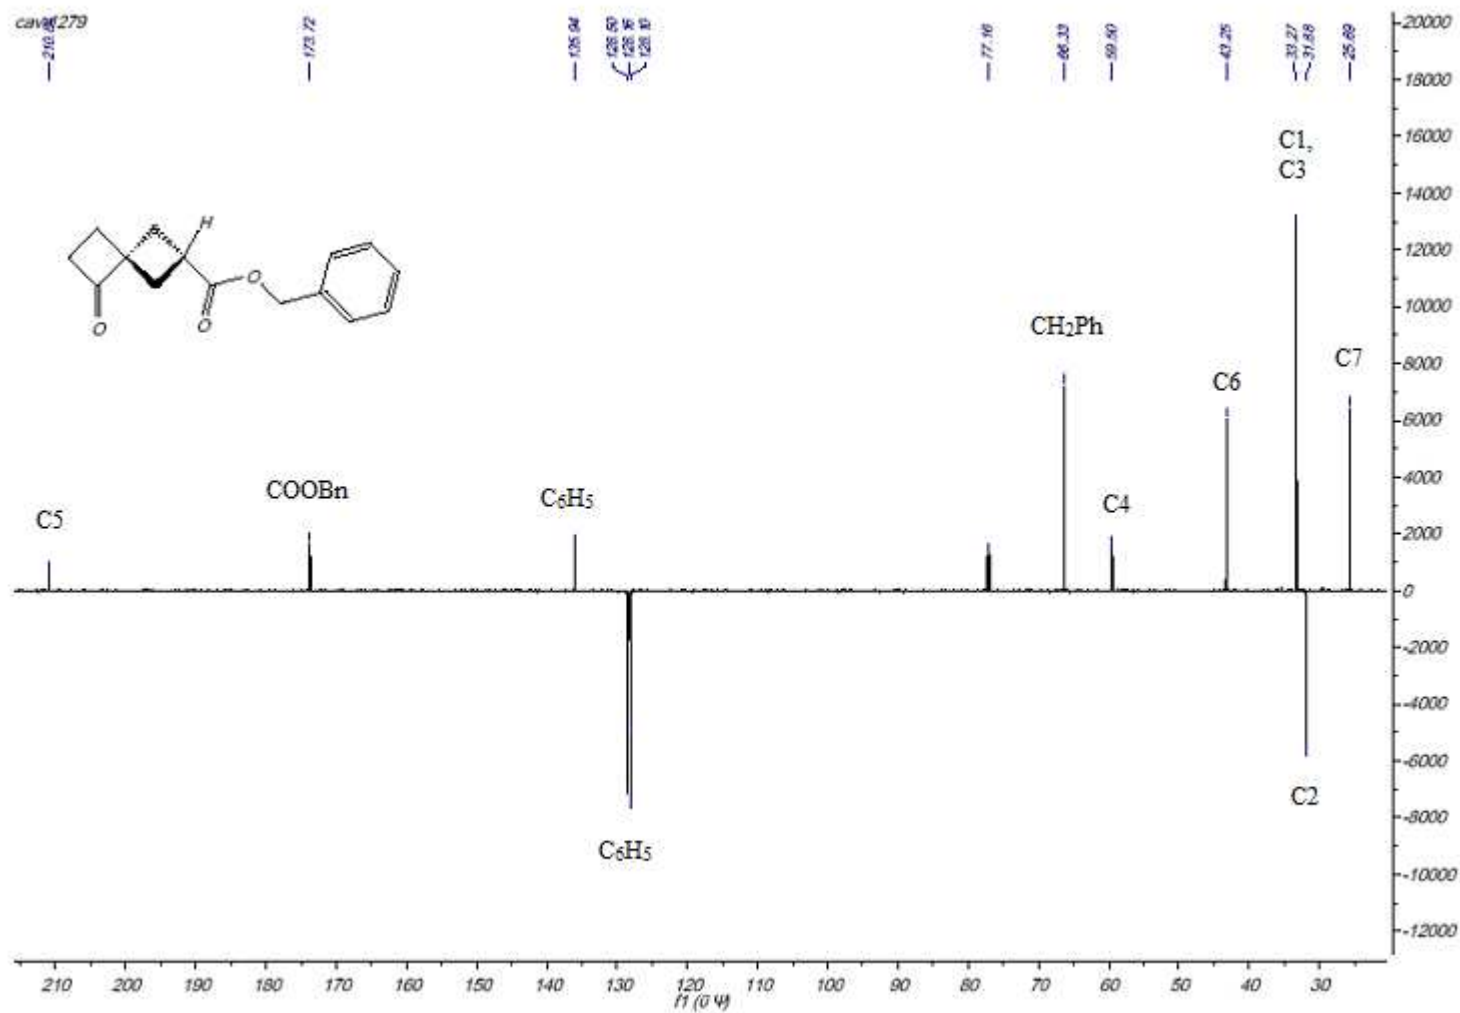

NOE spectrum of the compound **11b**

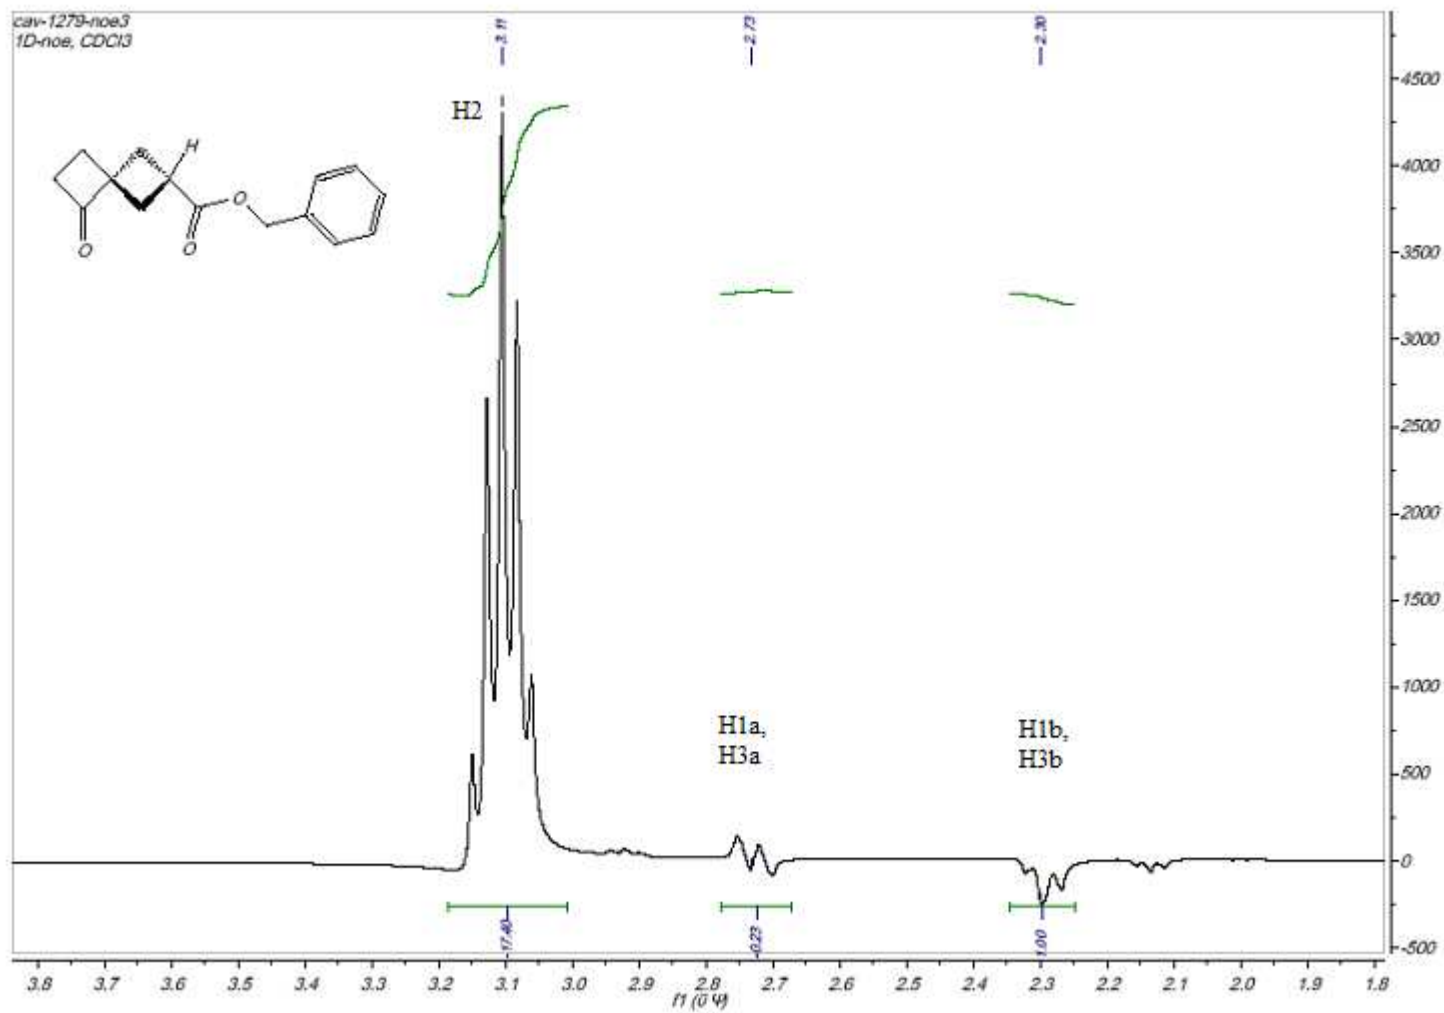

$^1\text{H}$ - $^1\text{H}$  COSY spectrum of the compound **11b**

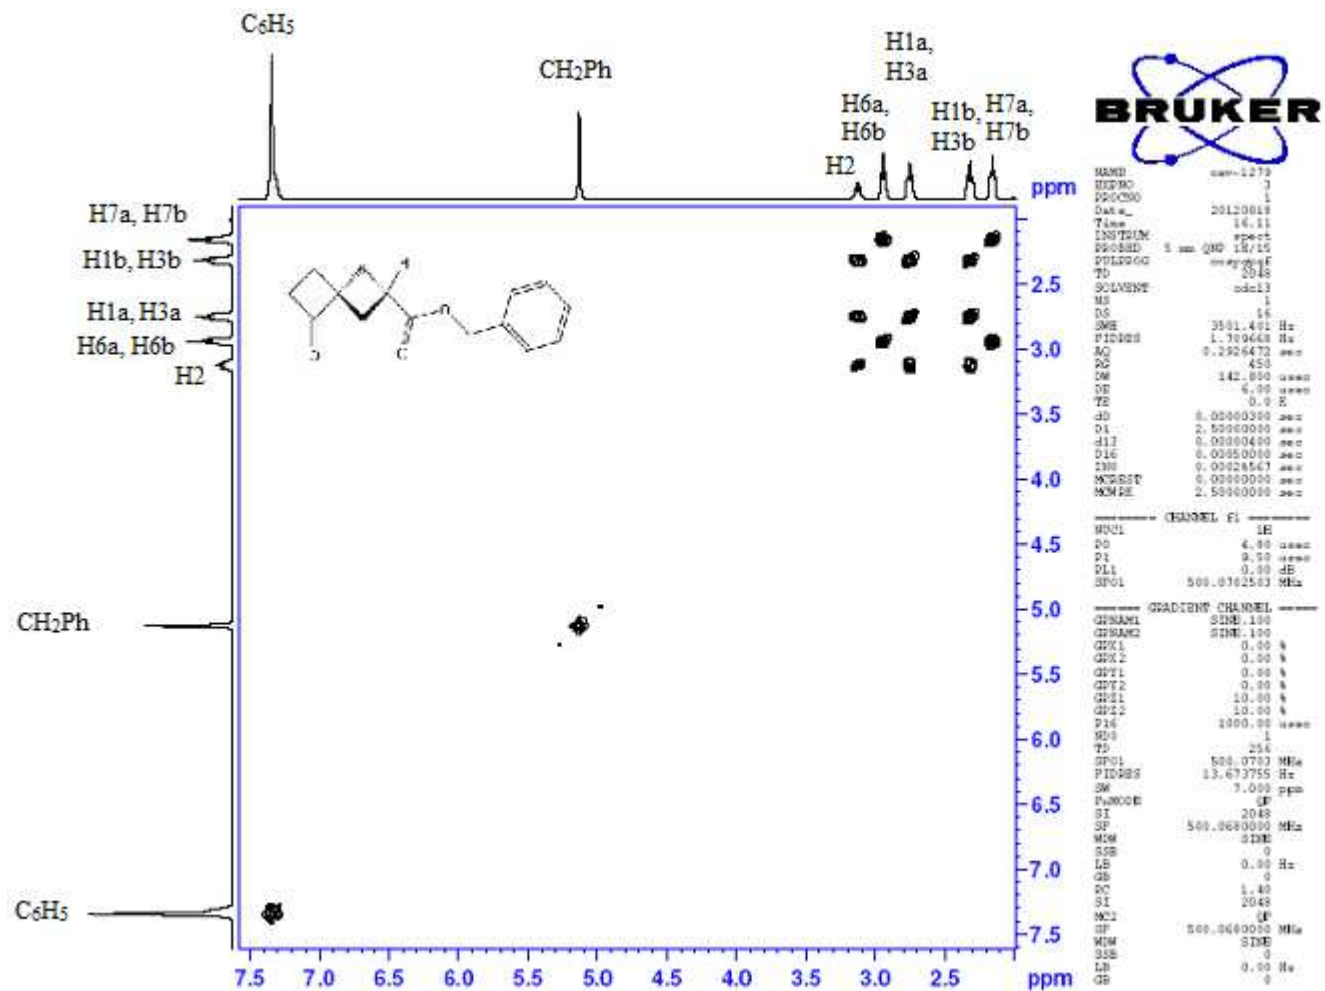



# HSQC spectrum of the compound 11b

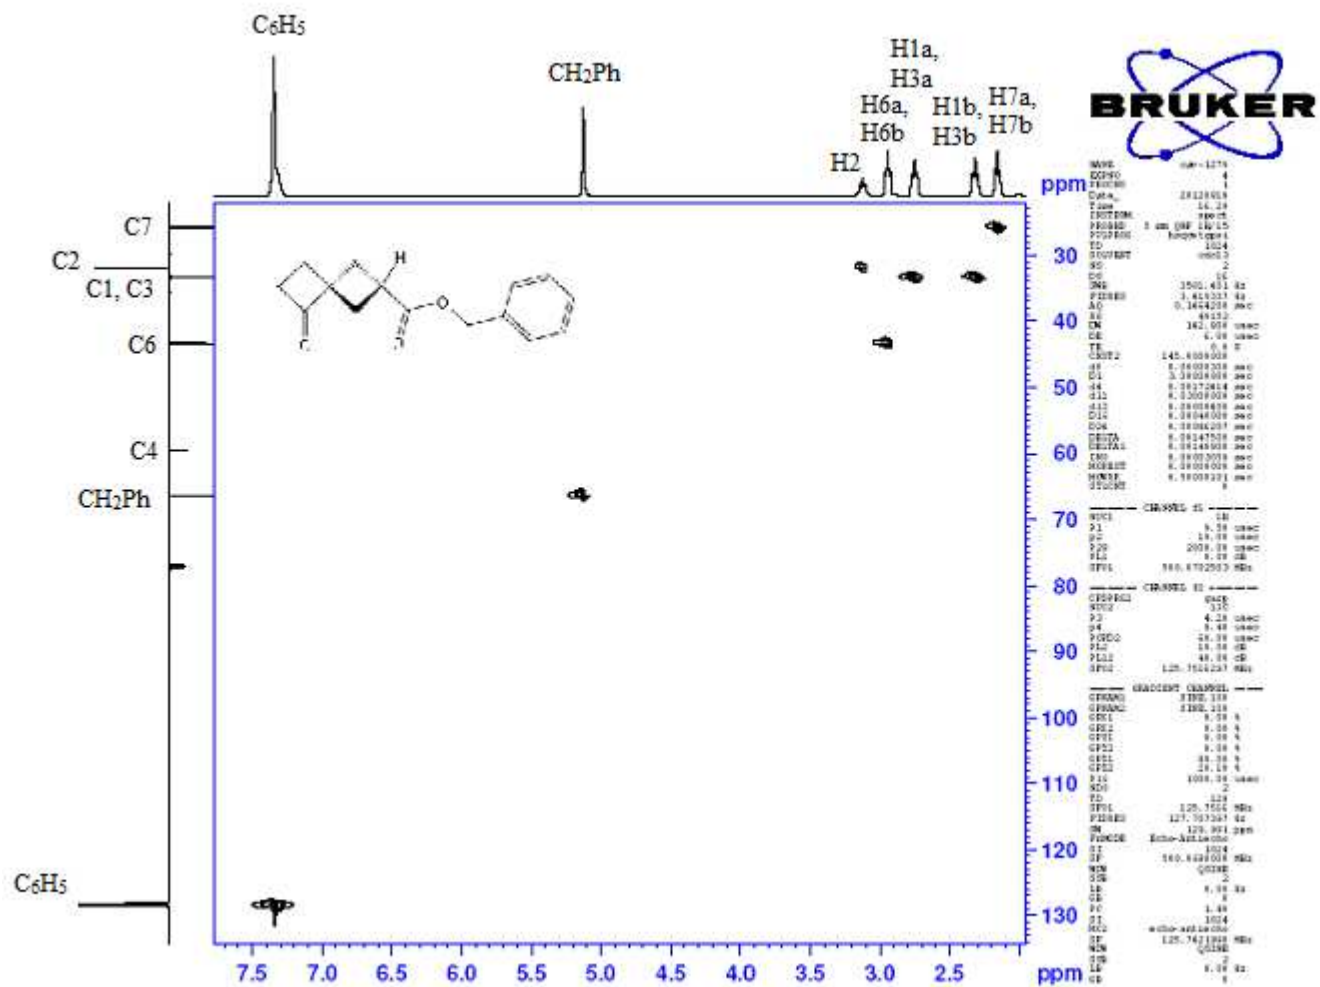

### NOESY spectrum of the compound 11b

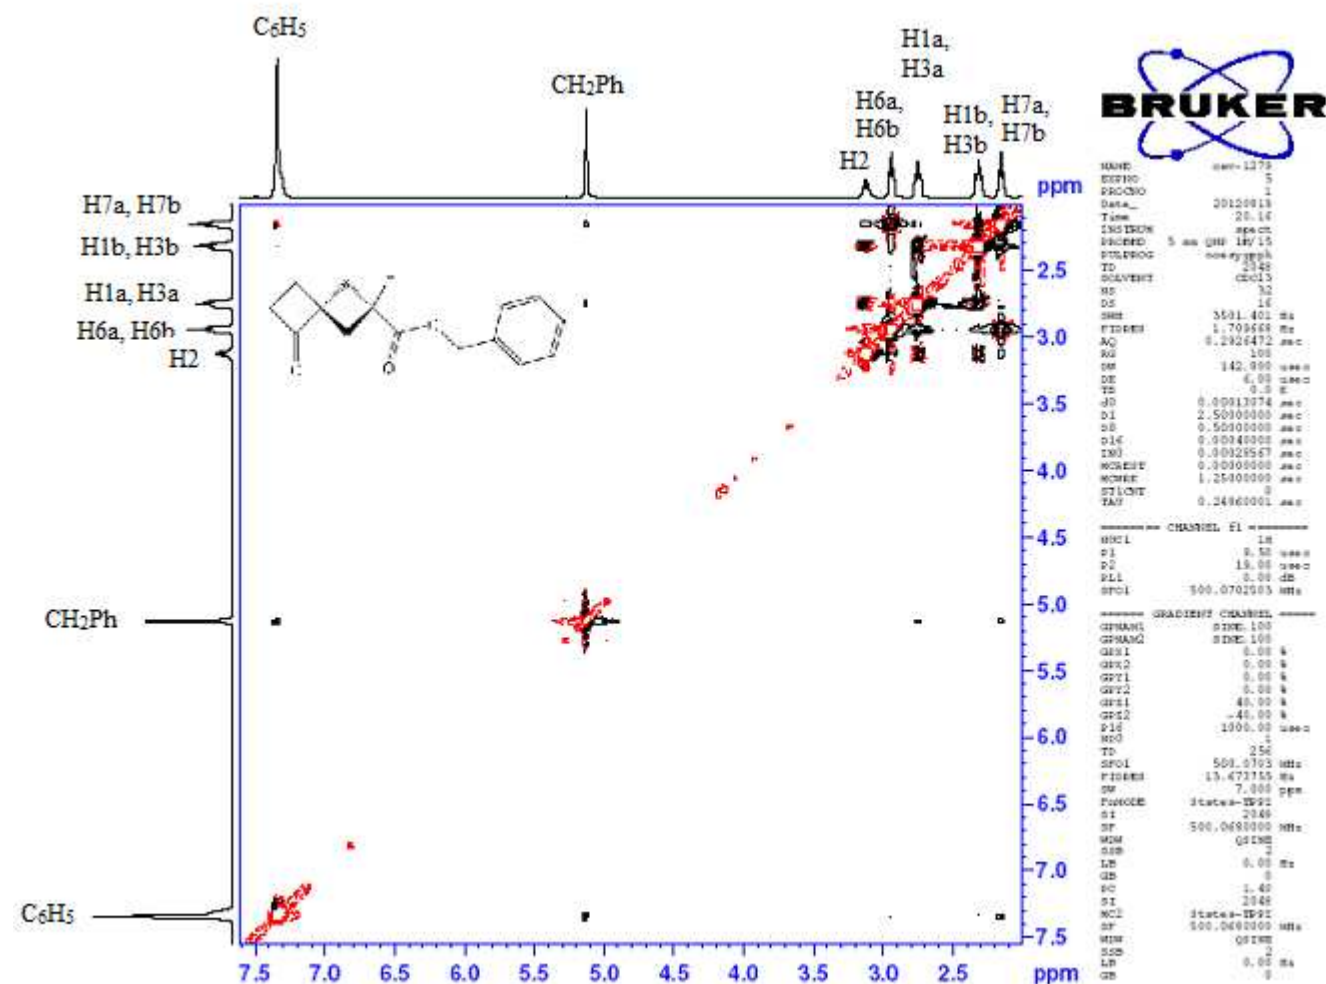

NOESY spectrum of the compound **11b** (fragment)

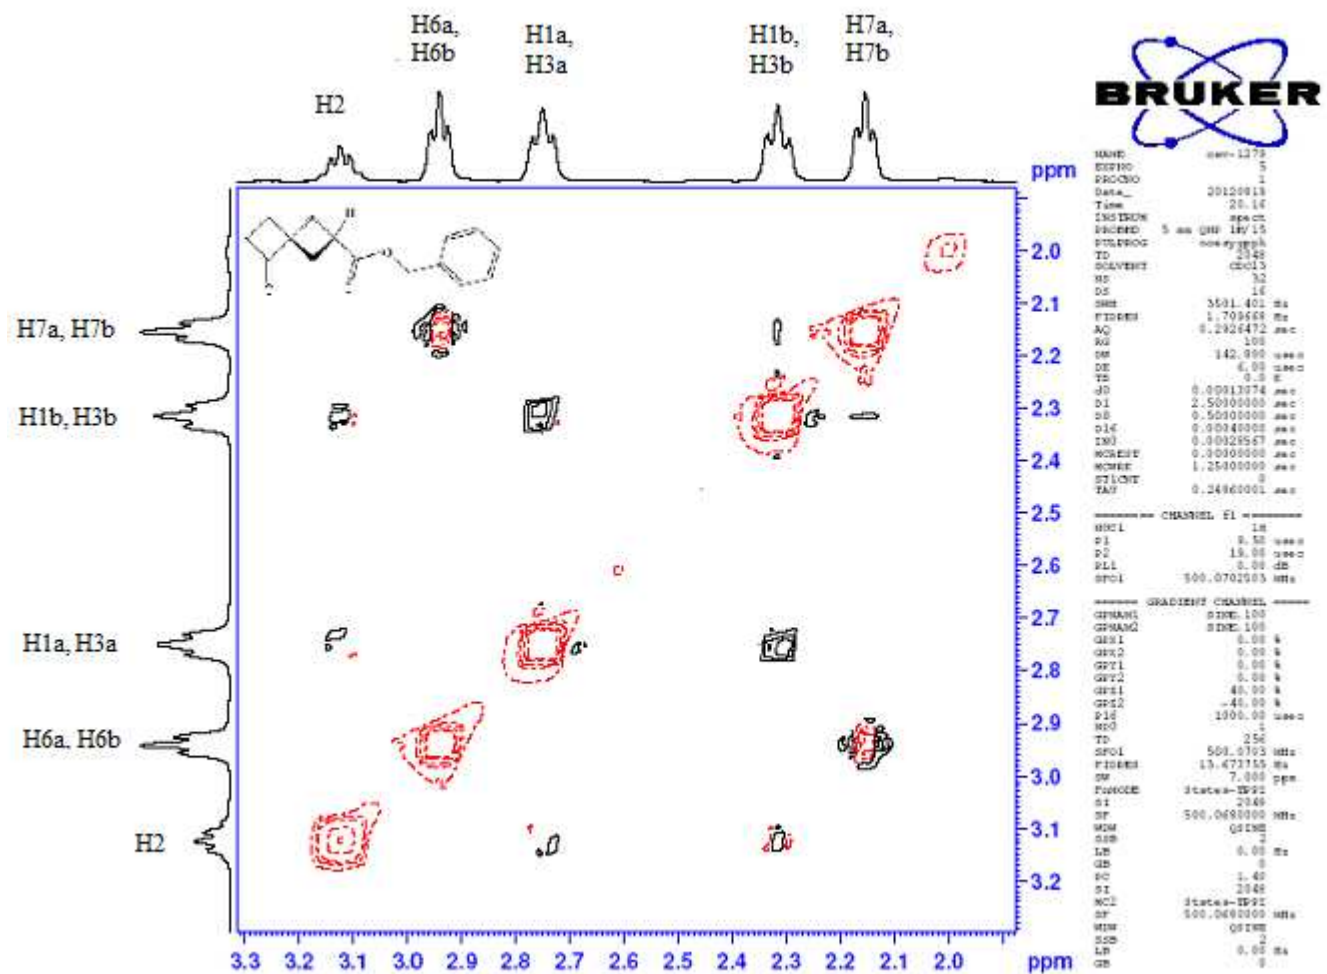

$^1\text{H}$  NMR spectrum of the compound **16a**

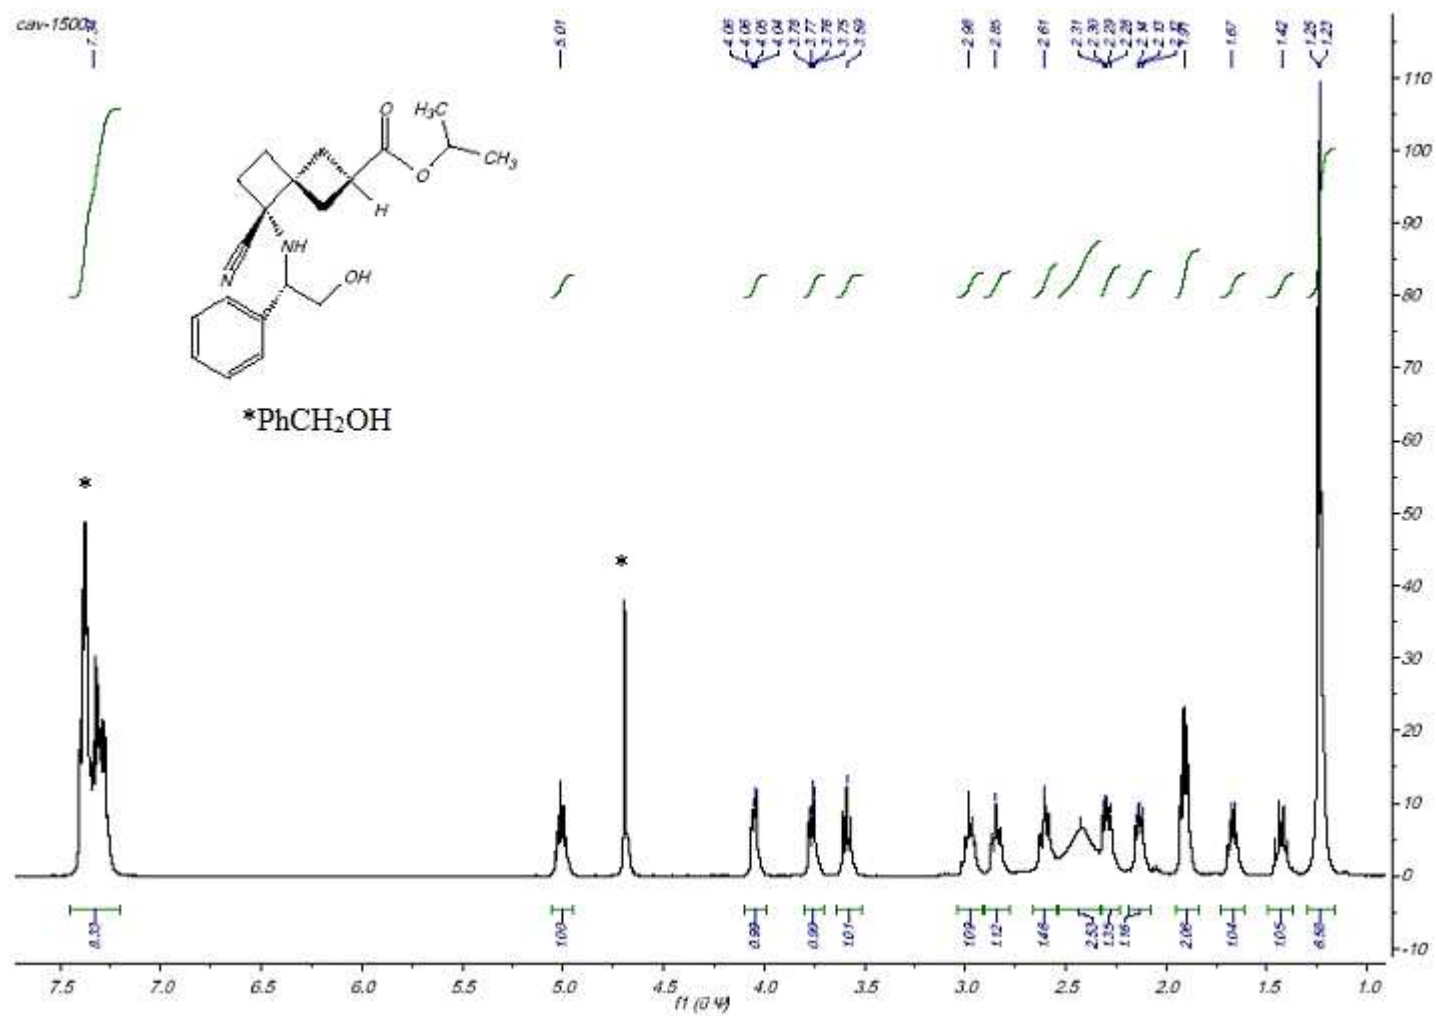

<sup>13</sup>C NMR spectrum of the compound **16a**

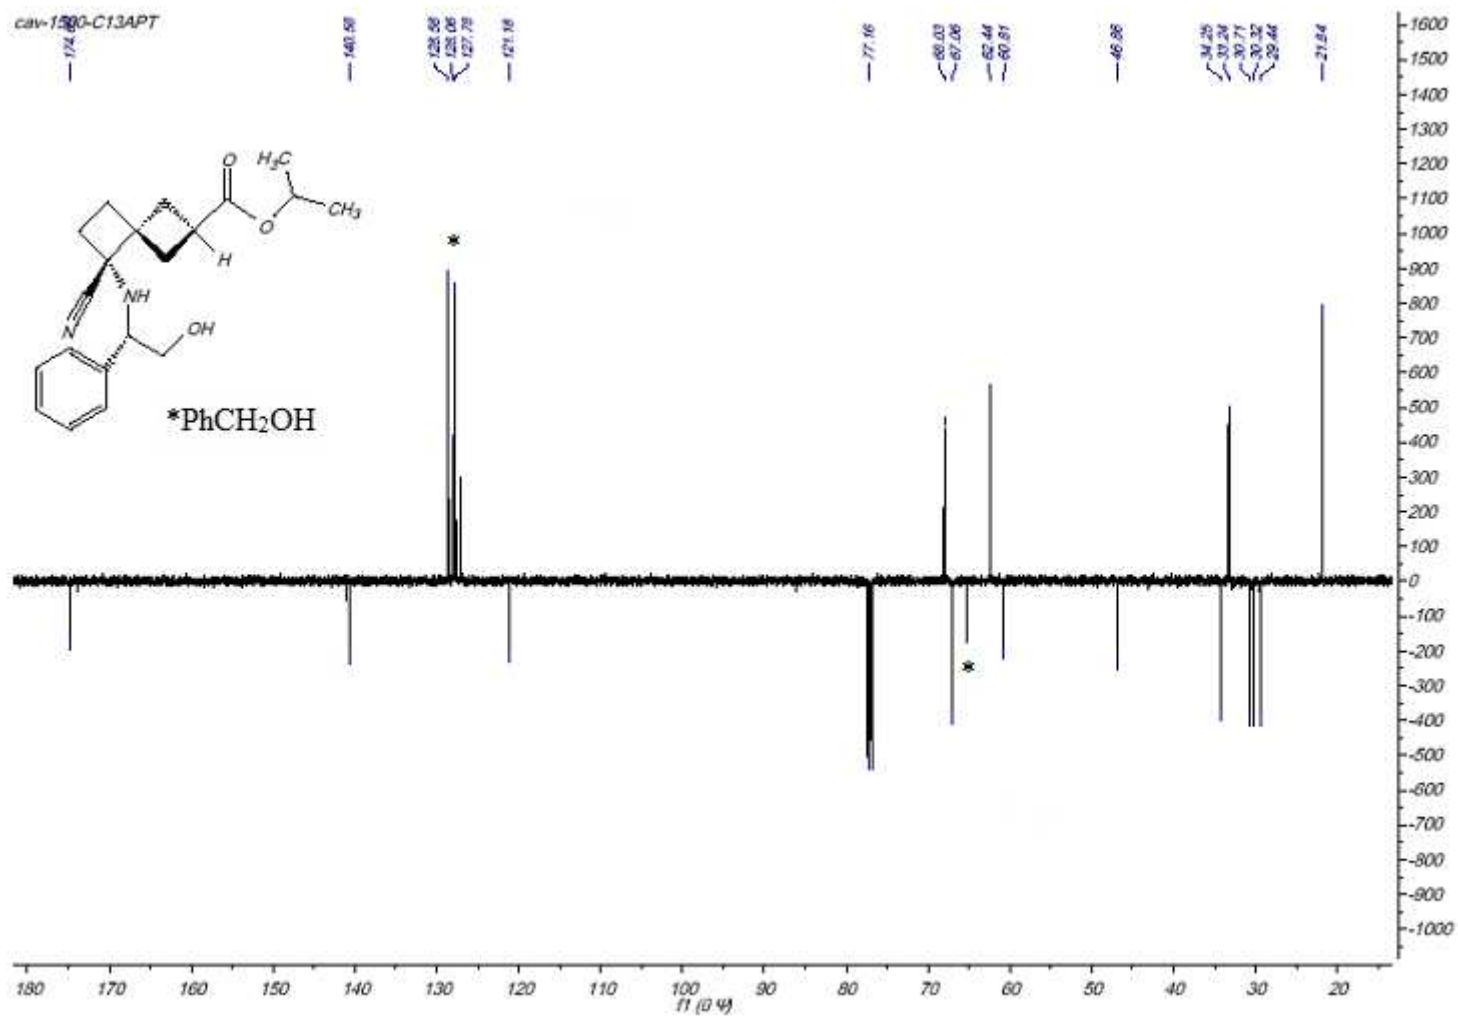

# <sup>1</sup>H NMR spectrum of the compound **16b**

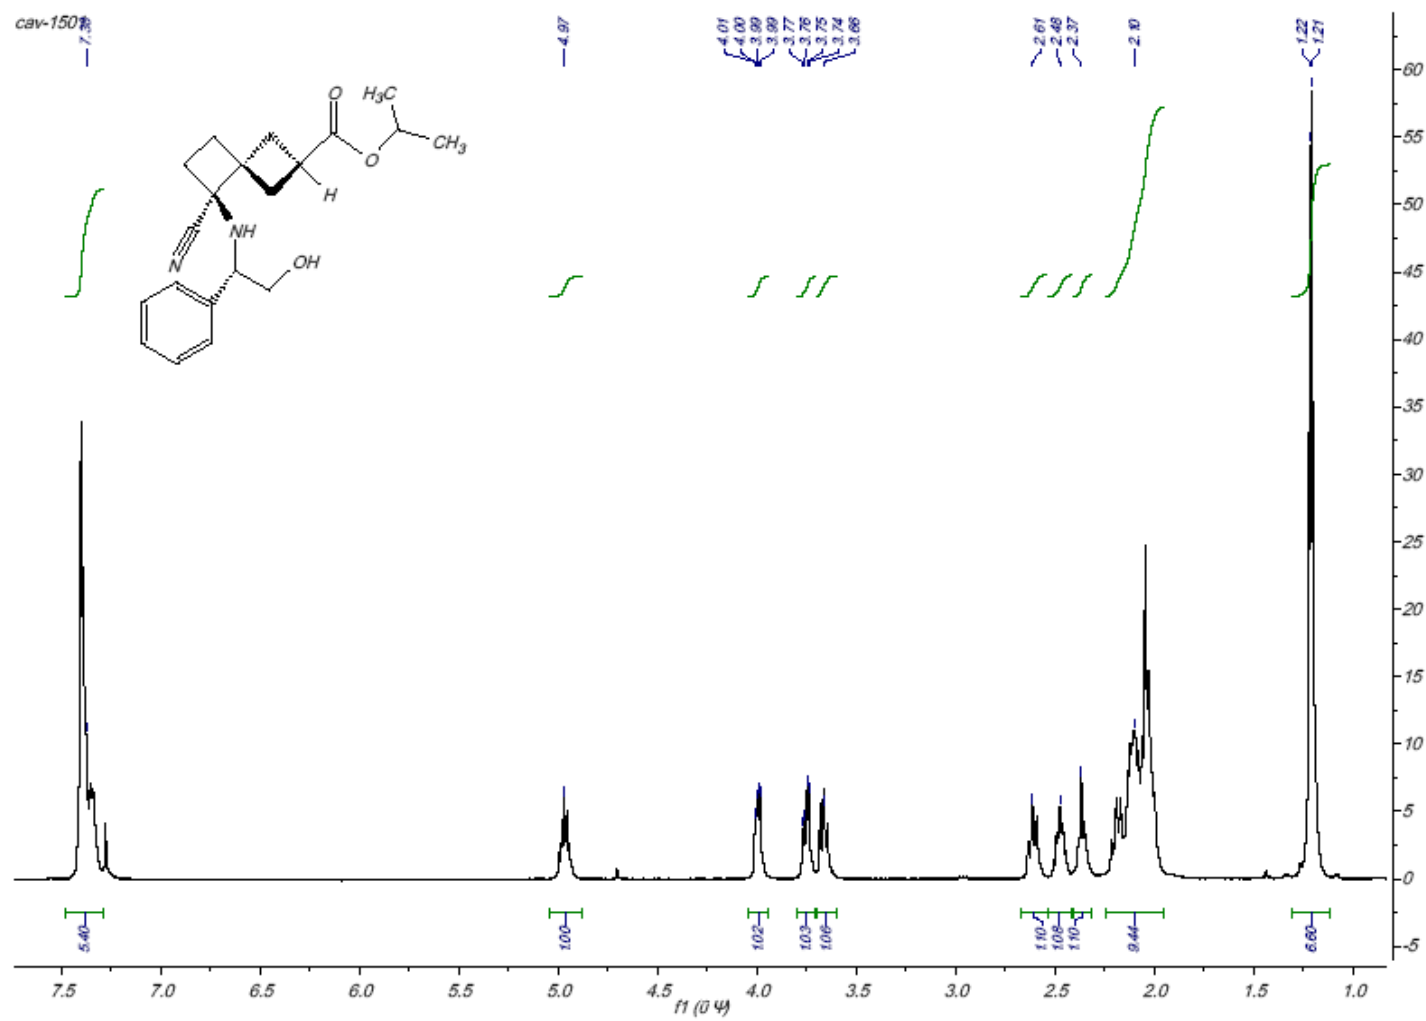

<sup>13</sup>C NMR spectrum of the compound **16b**

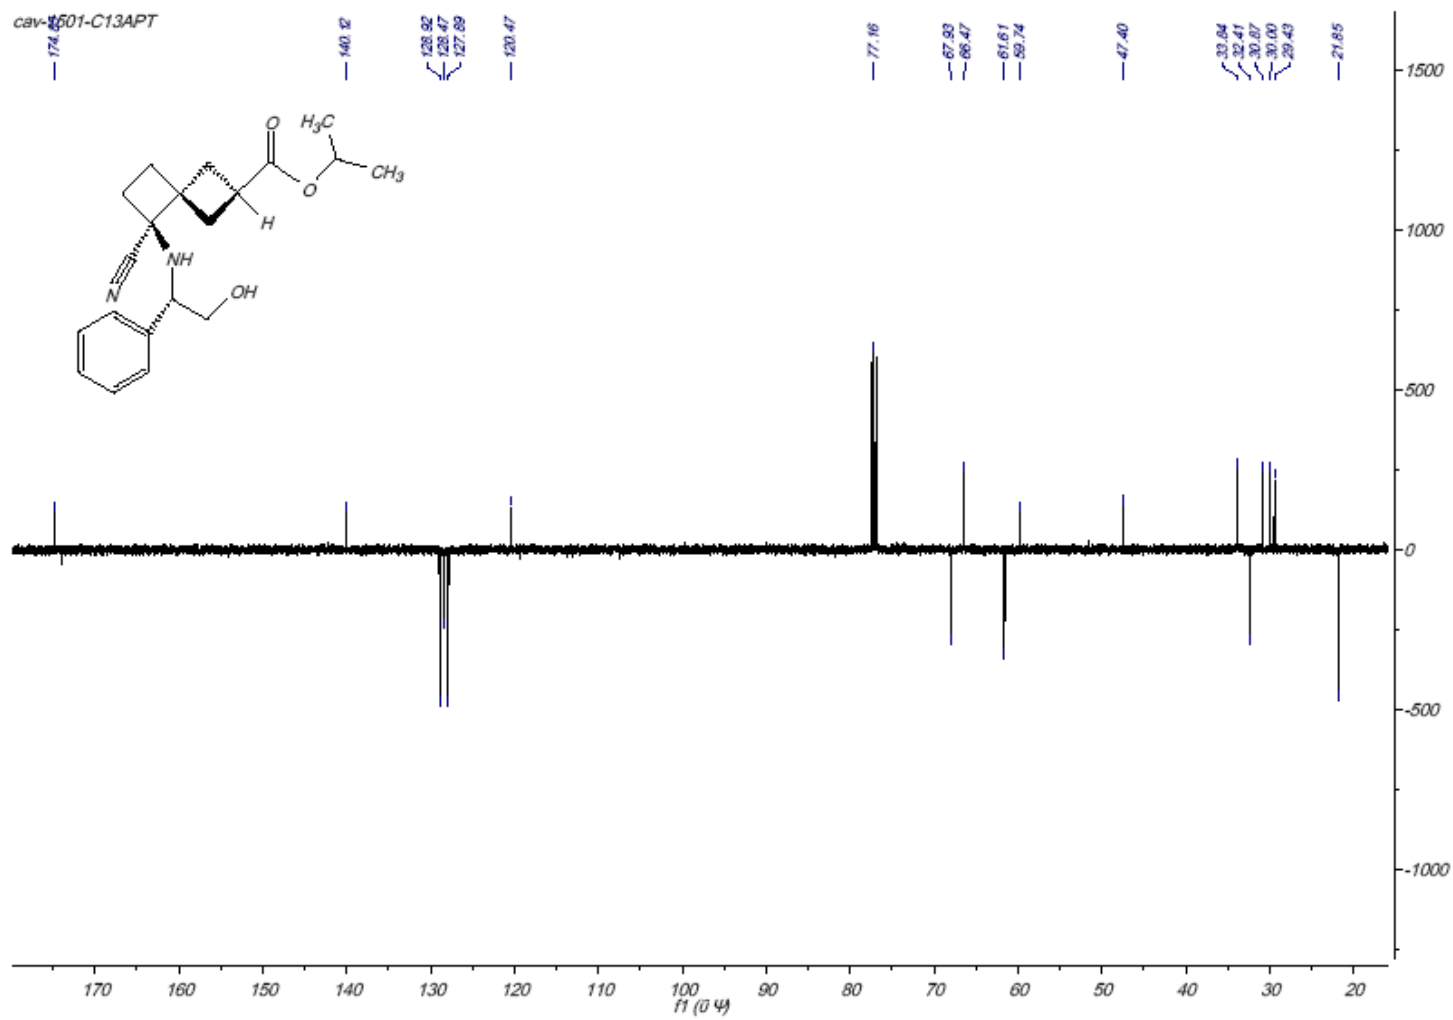

$^1\text{H}$  NMR spectrum of the compound **16c**

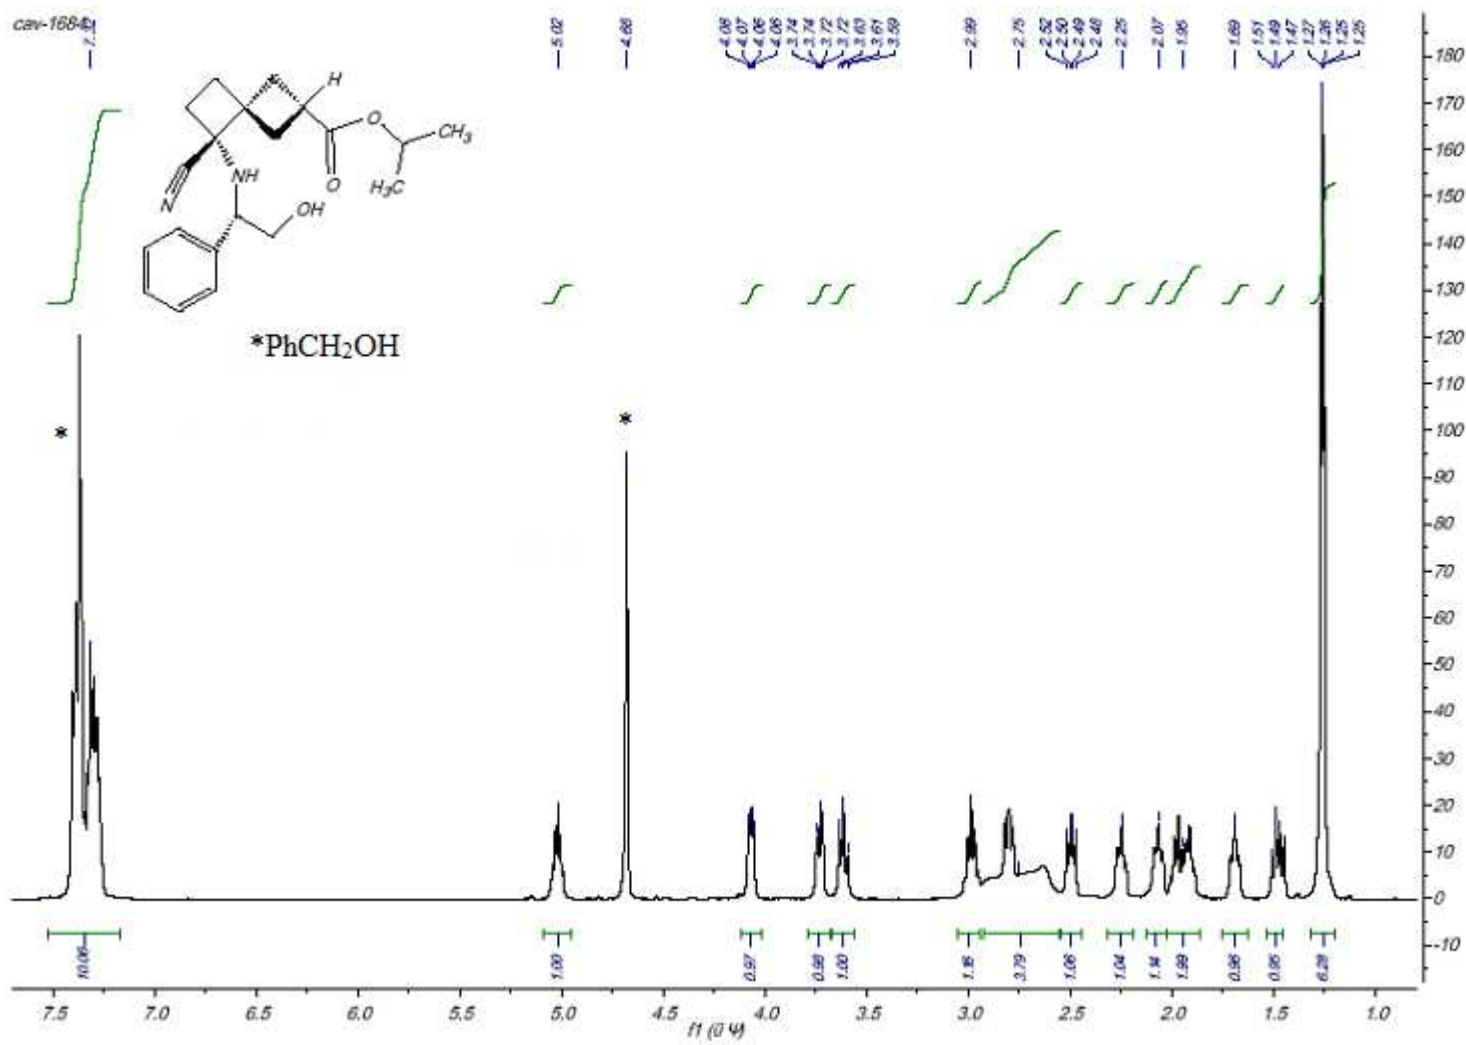



<sup>13</sup>C NMR spectrum of the compound **16c**

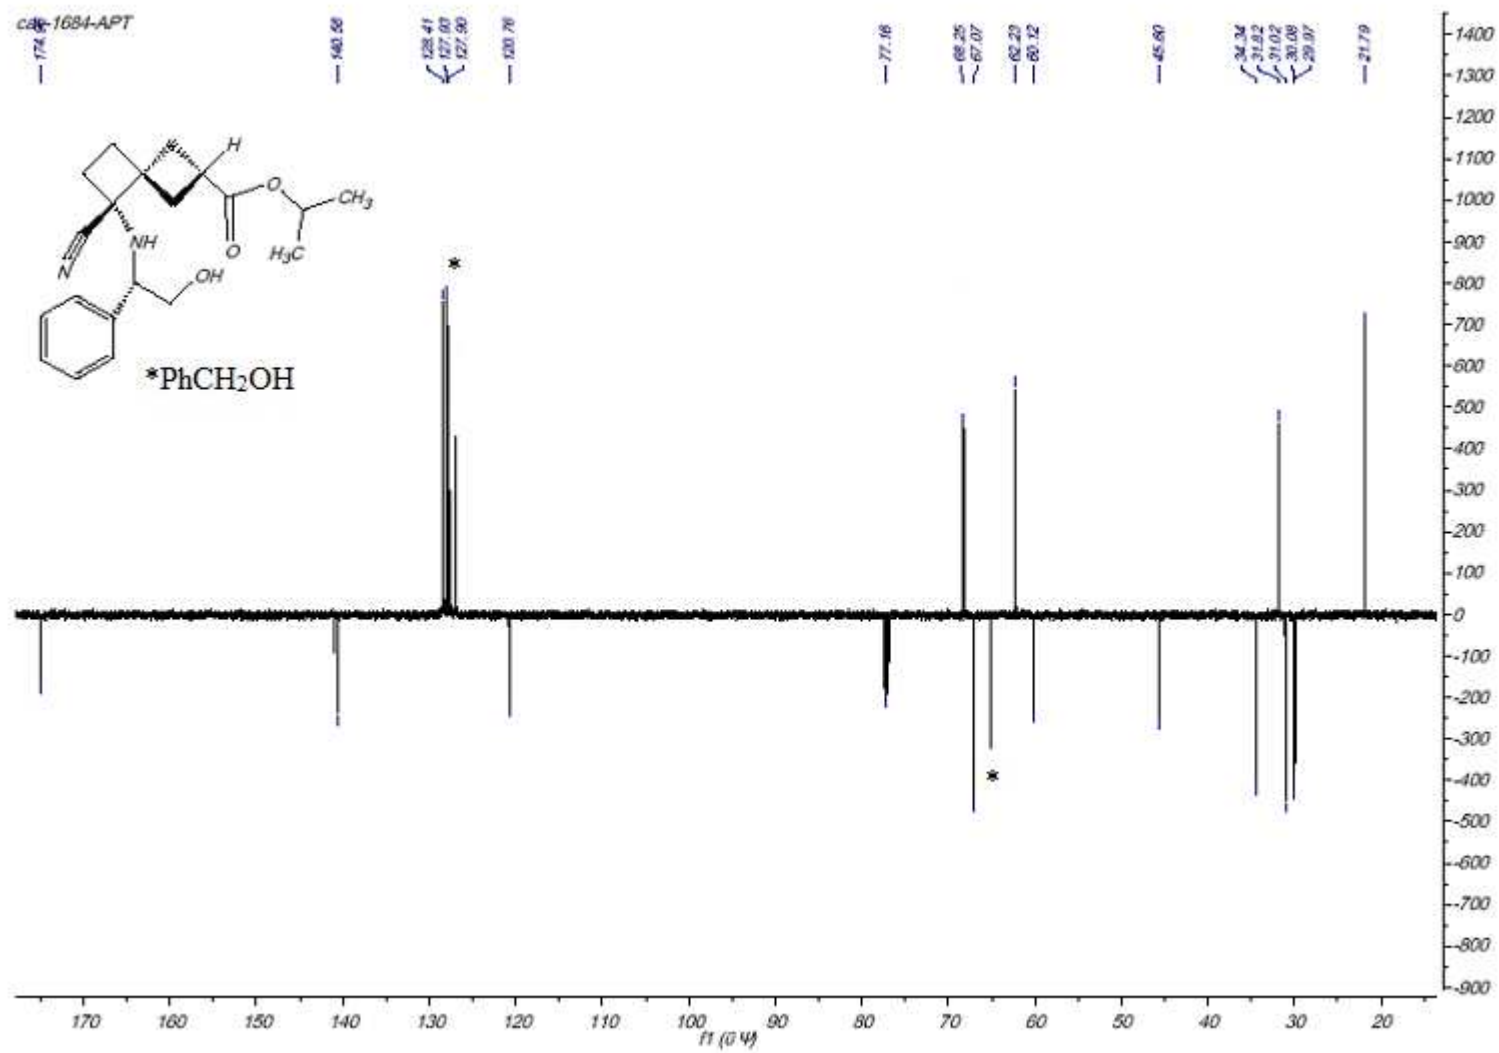

<sup>1</sup>H NMR spectrum of the compound **16d**

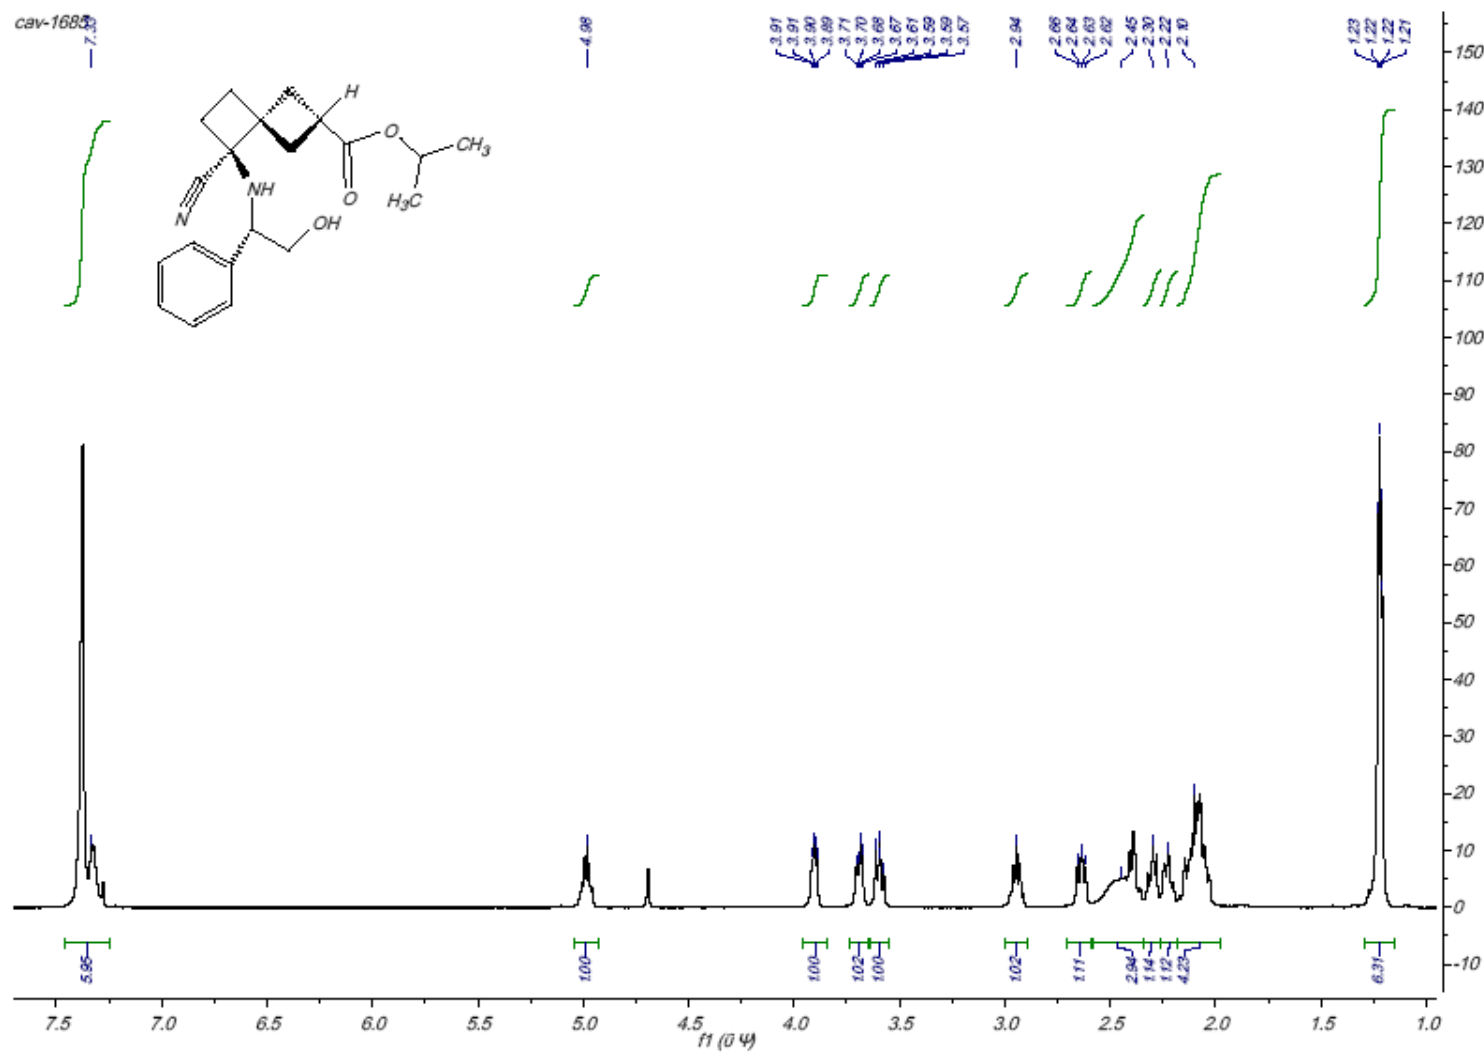

<sup>13</sup>C NMR spectrum of the compound **16d**

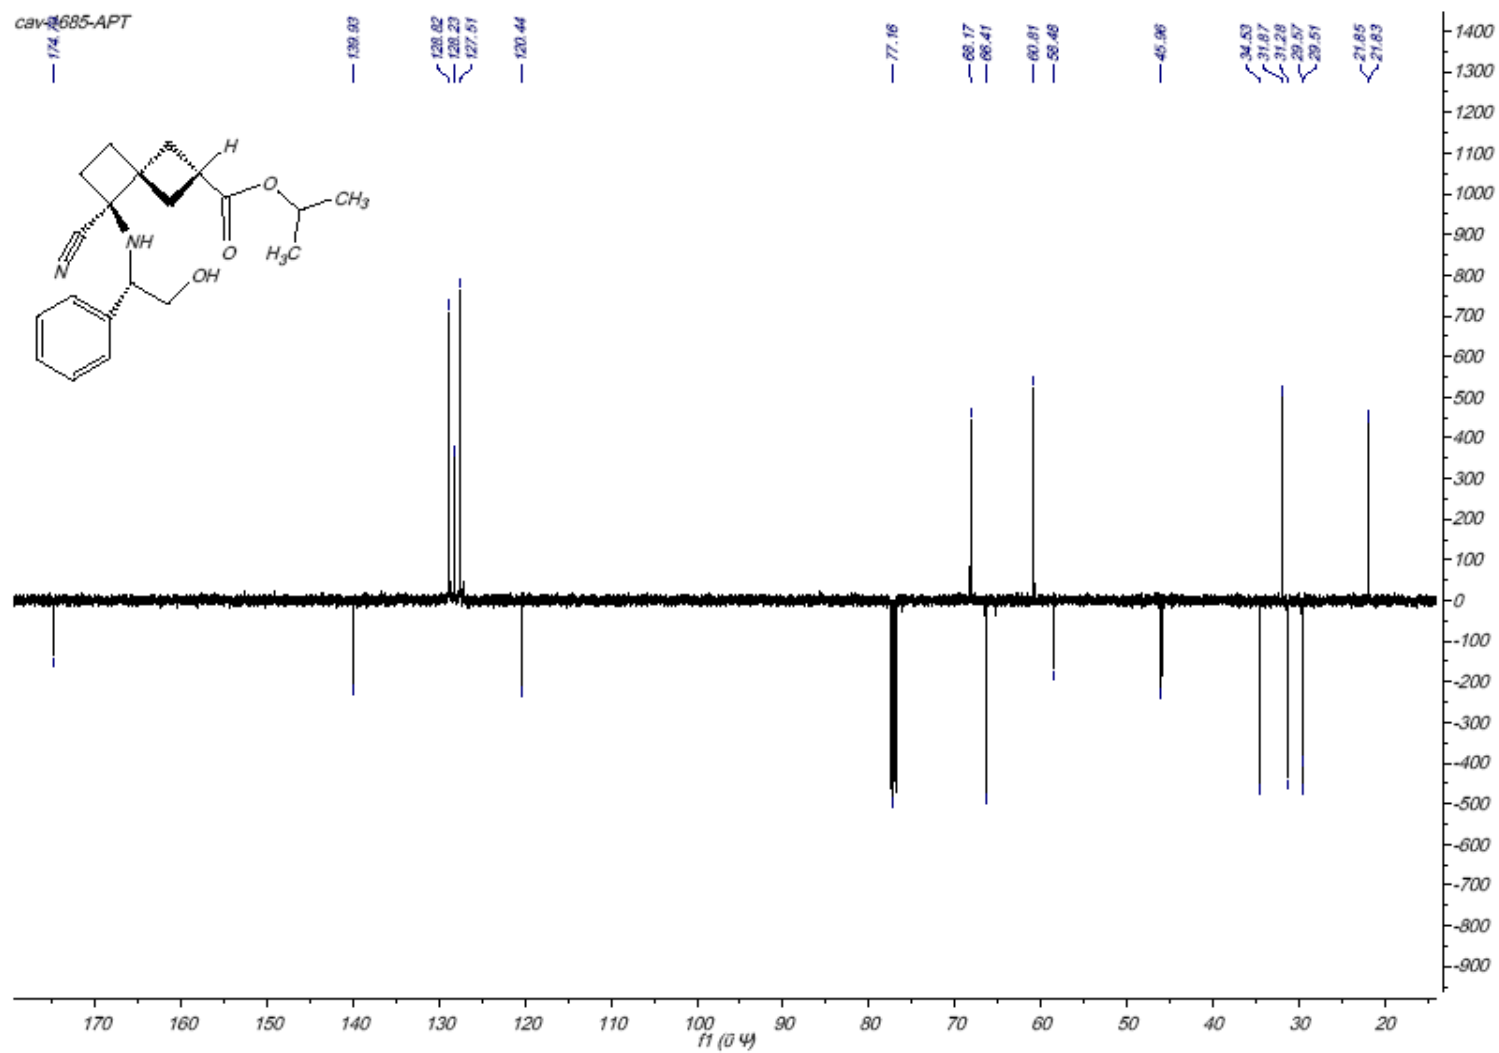

$^1\text{H}$  NMR spectrum of the compound **1a**·HCl

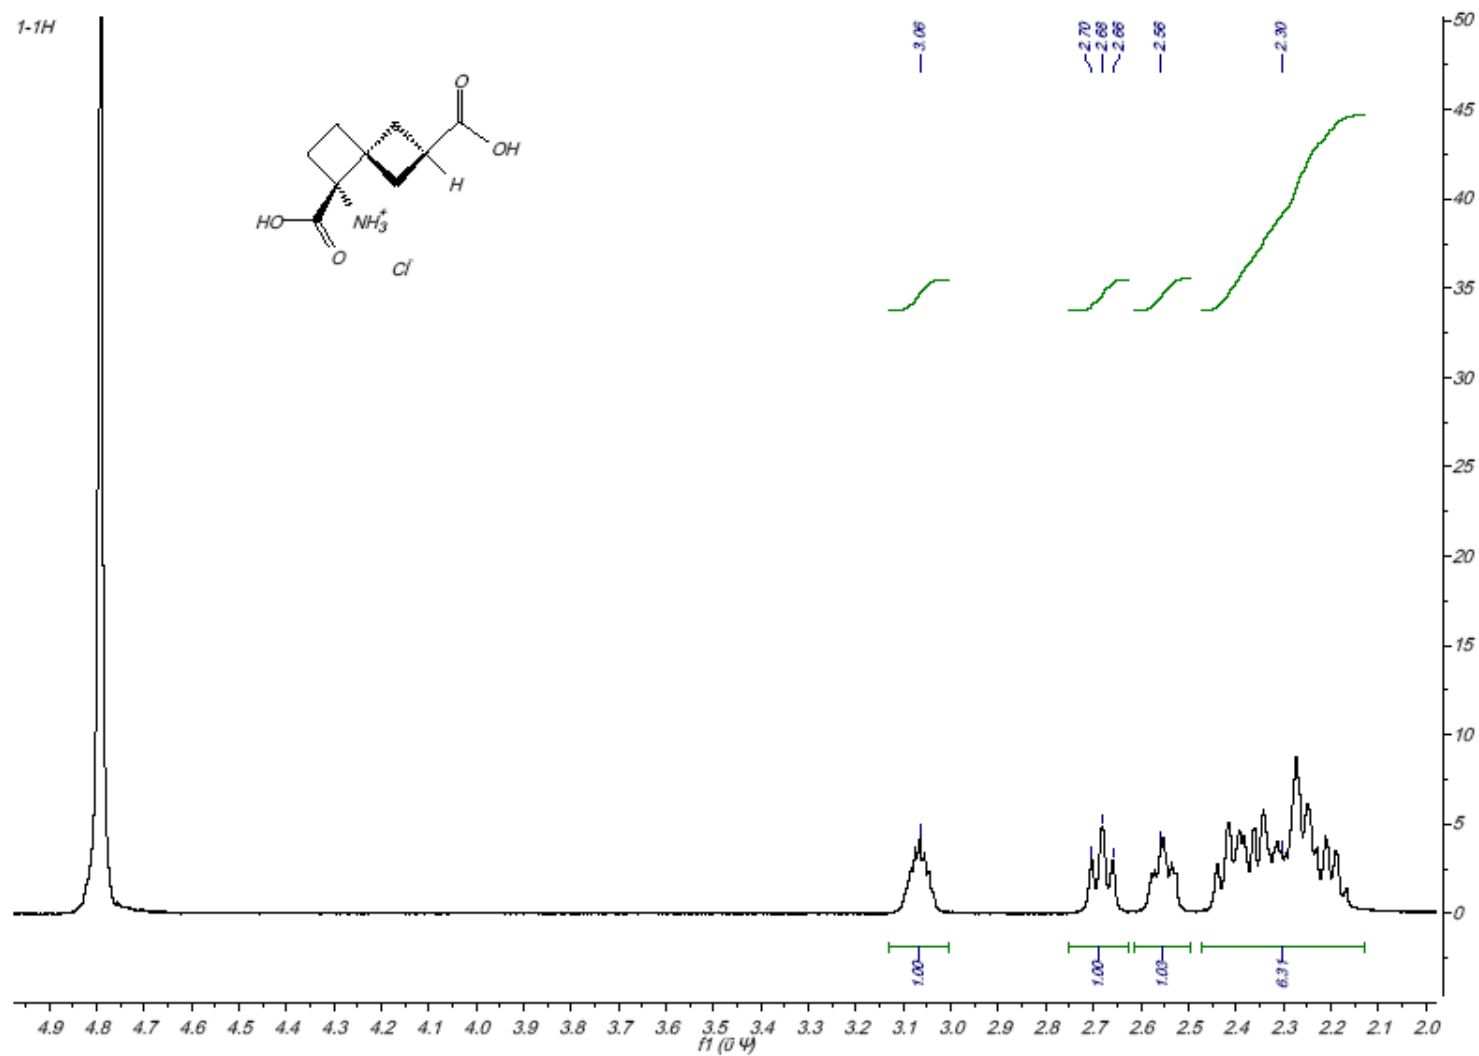

<sup>13</sup>C NMR spectrum of the compound **1a**·HCl

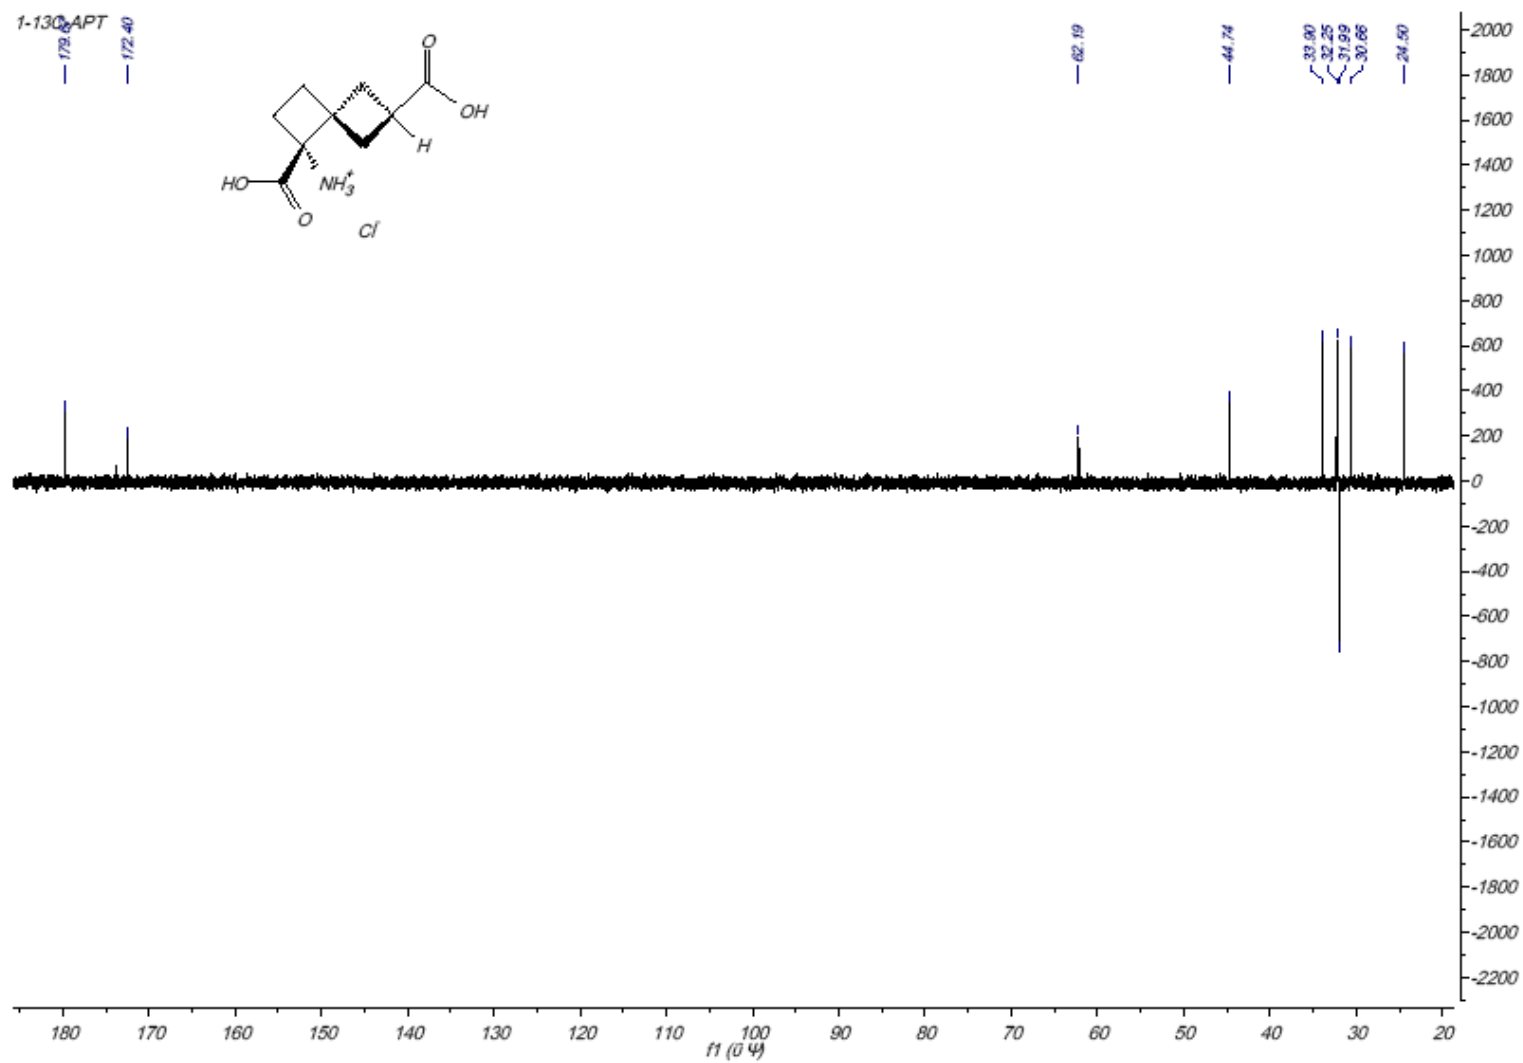

$^1\text{H}$  NMR spectrum of the compound **1b**·HCl

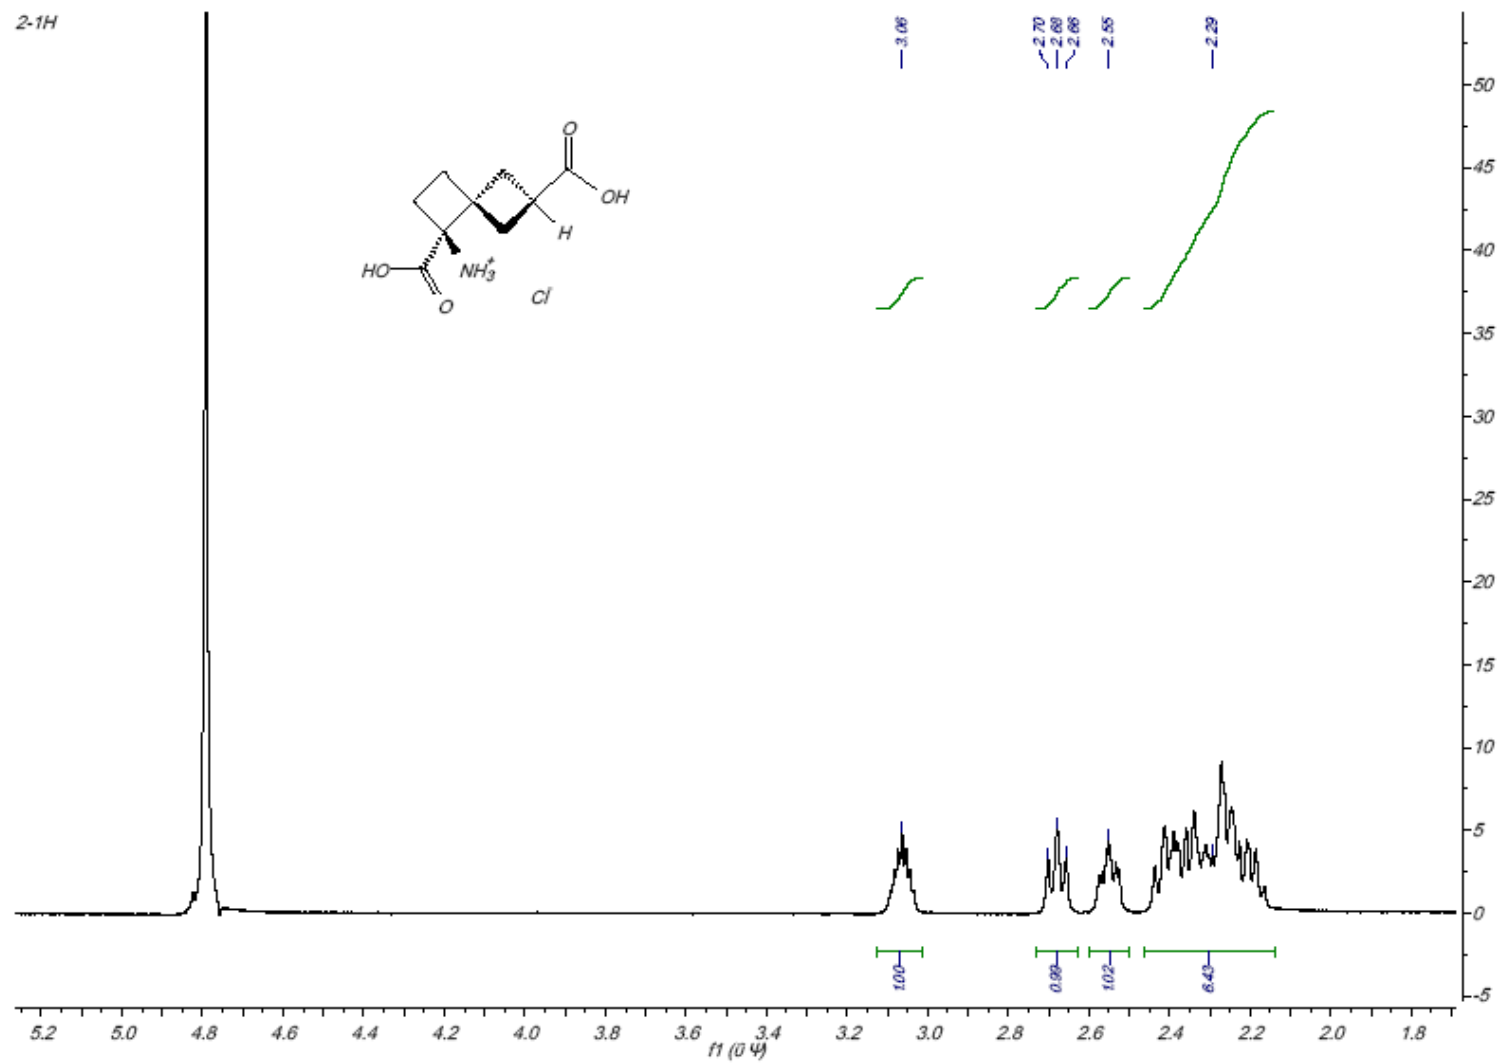

$^{13}\text{C}$  NMR spectrum of the compound **1b**·HCl

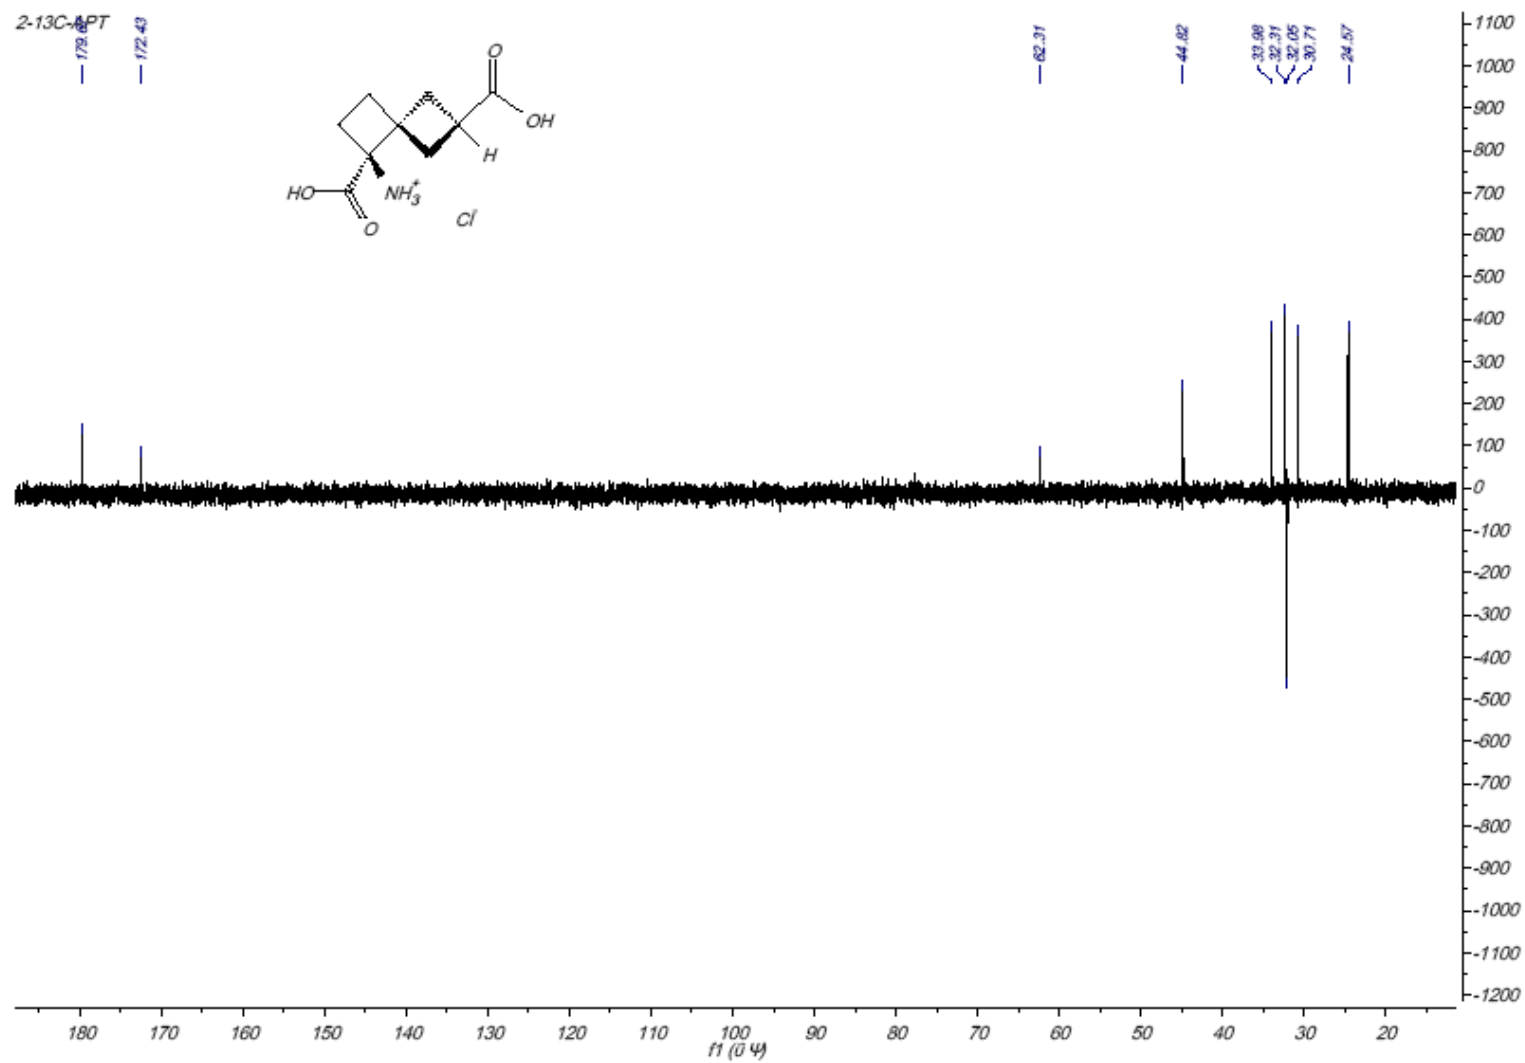

<sup>1</sup>H NMR spectrum of the compound **1c**·HCl

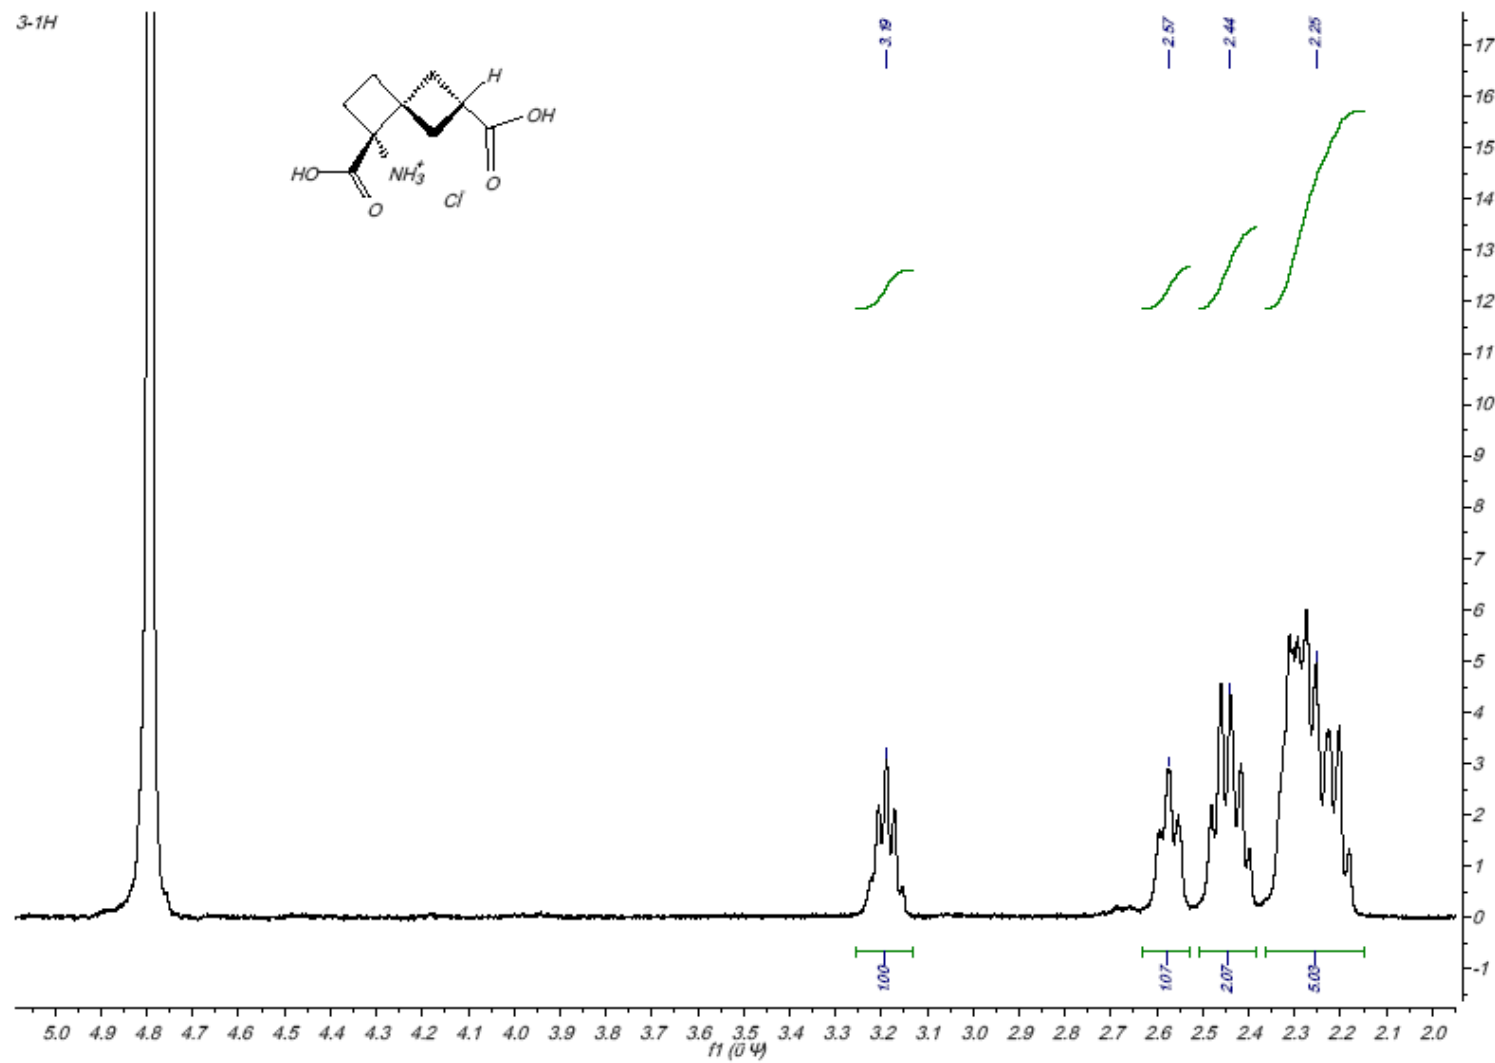



$^{13}\text{C}$  NMR spectrum of the compound **1c**·HCl

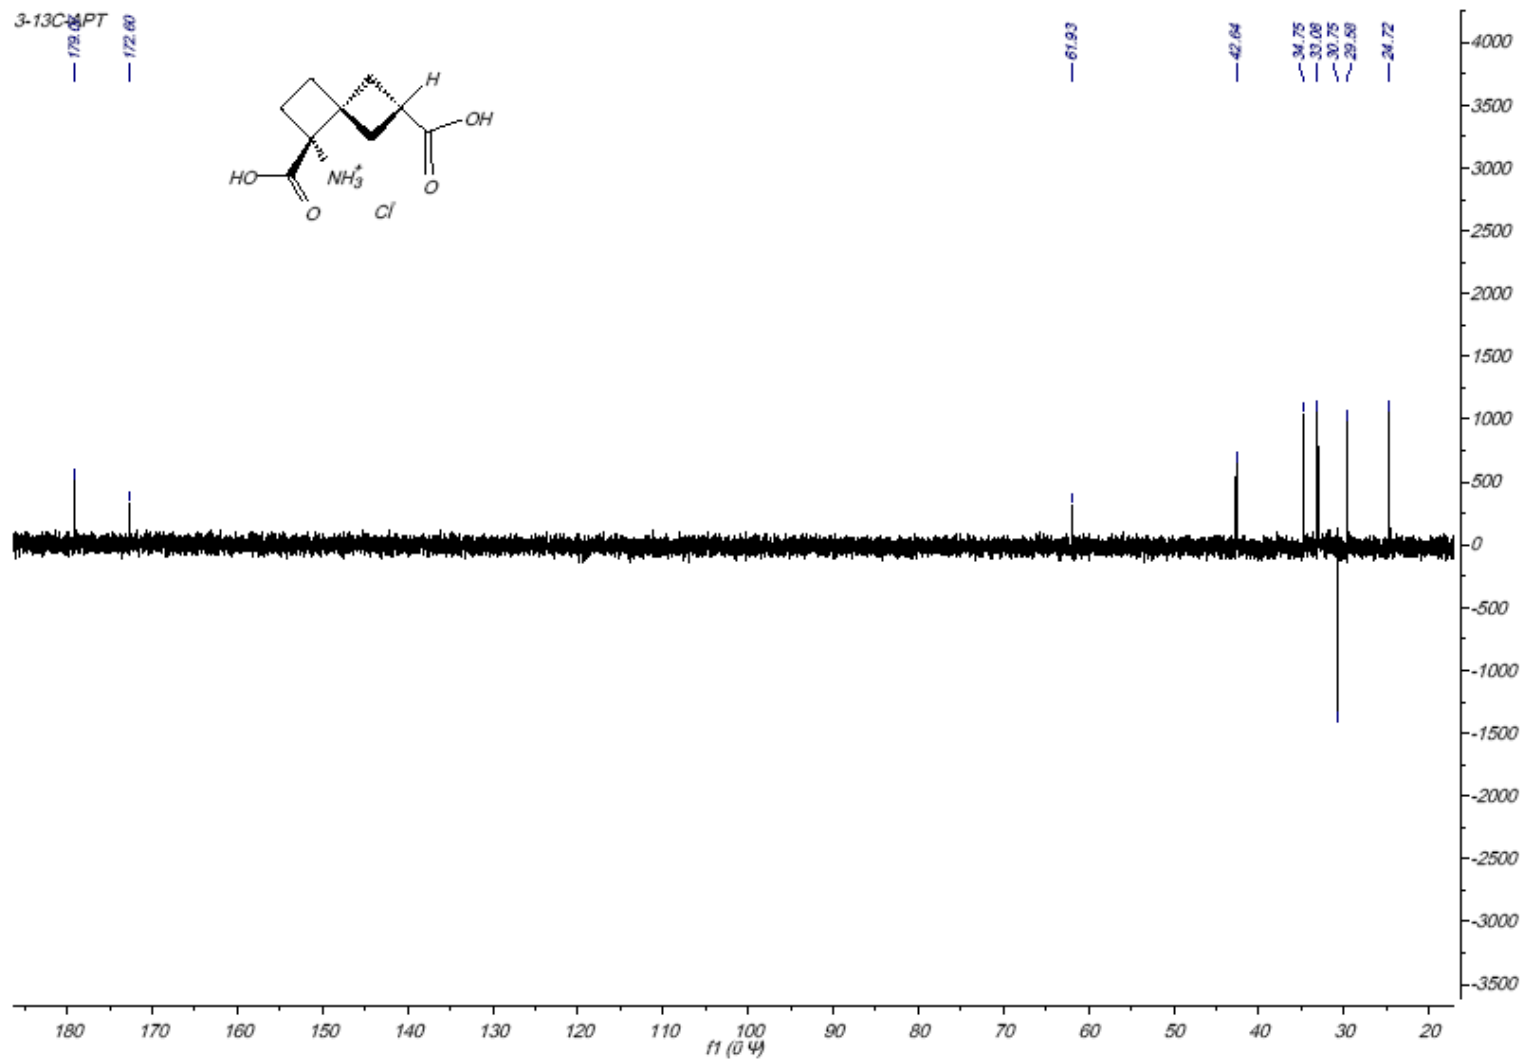

$^1\text{H}$  NMR spectrum of the compound **1d**·HCl

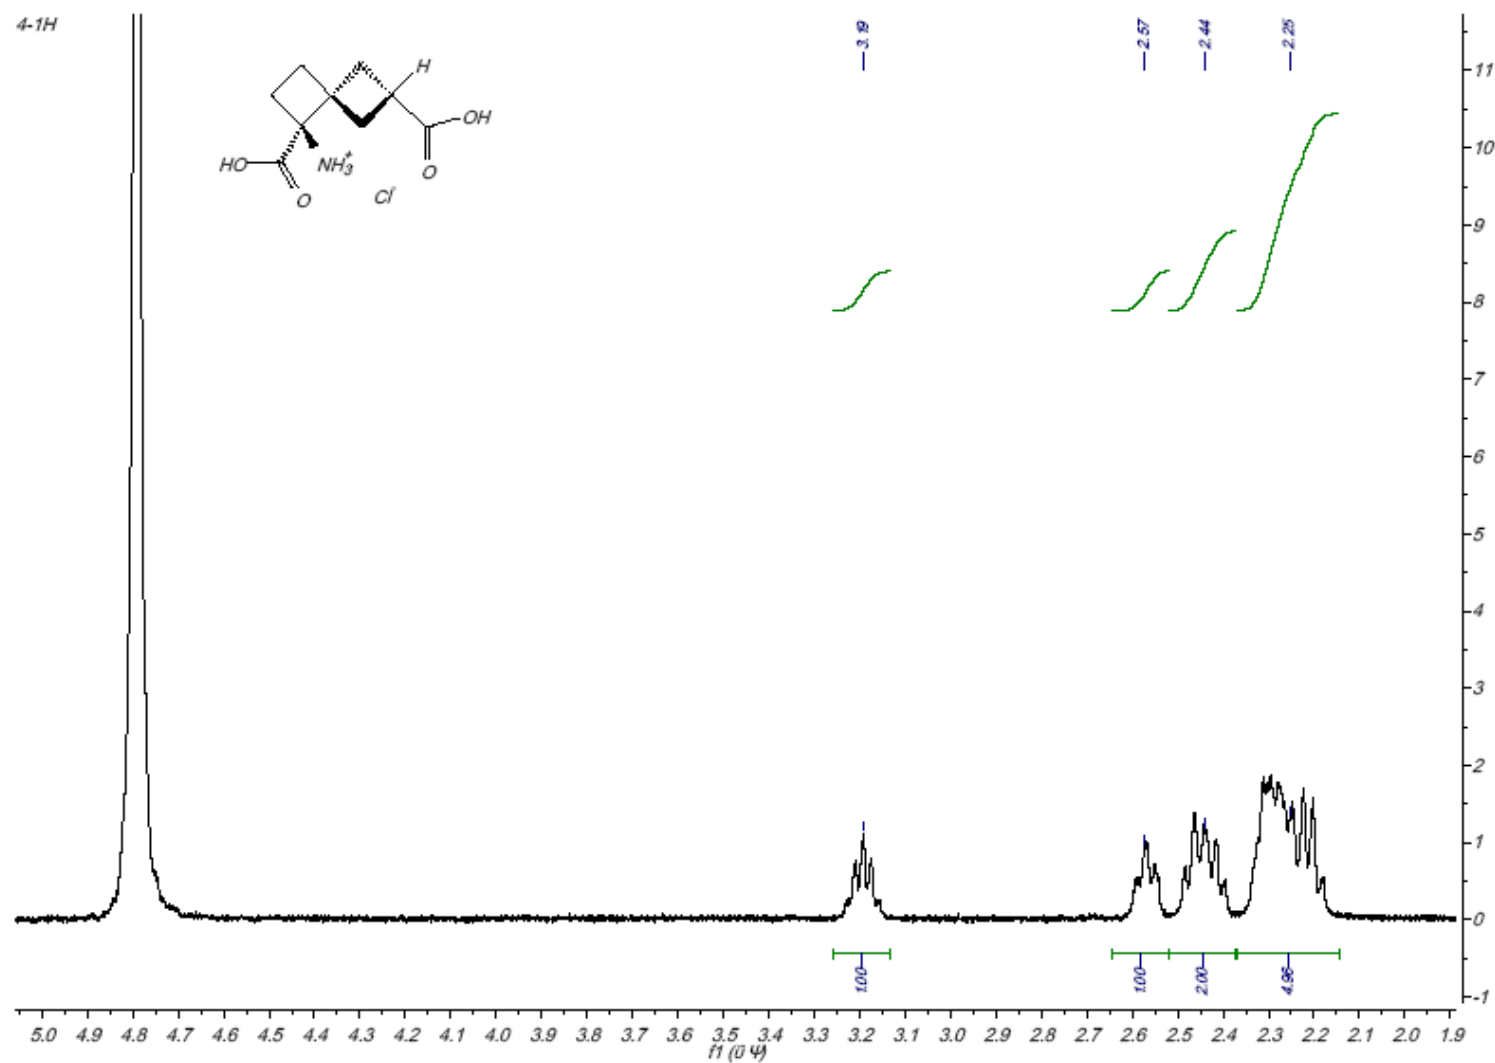

$^{13}\text{C}$  NMR spectrum of the compound **1d**·HCl

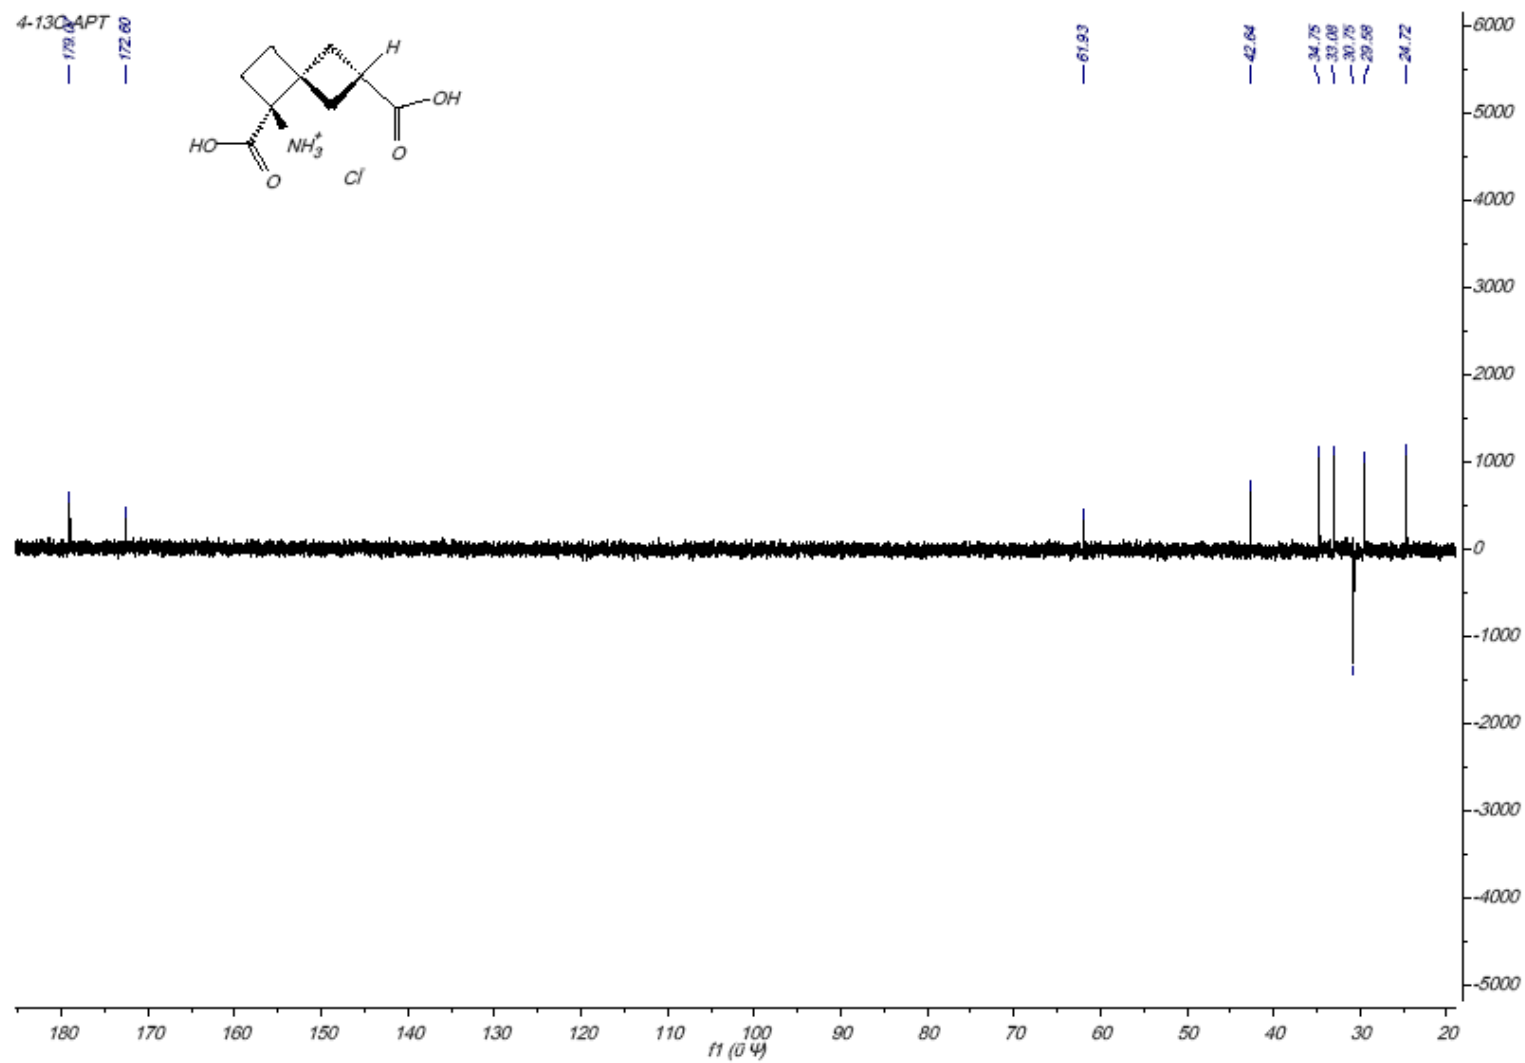

<sup>1</sup>H NMR spectrum of the compound **18a**

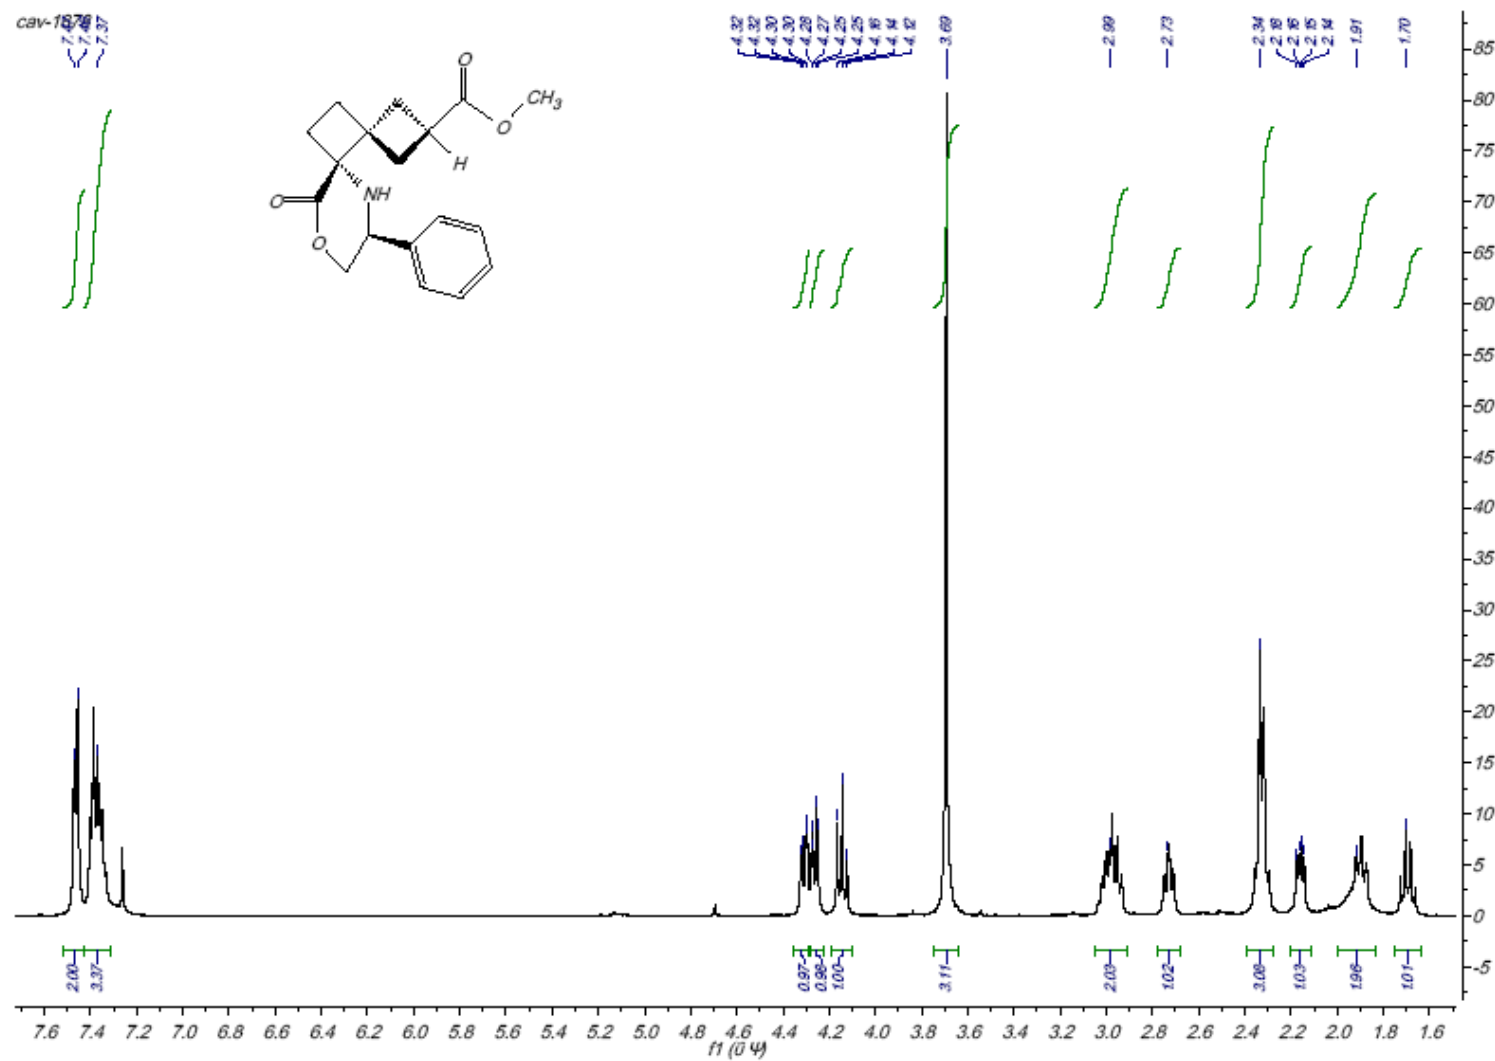

<sup>13</sup>C NMR spectrum of the compound **18a**

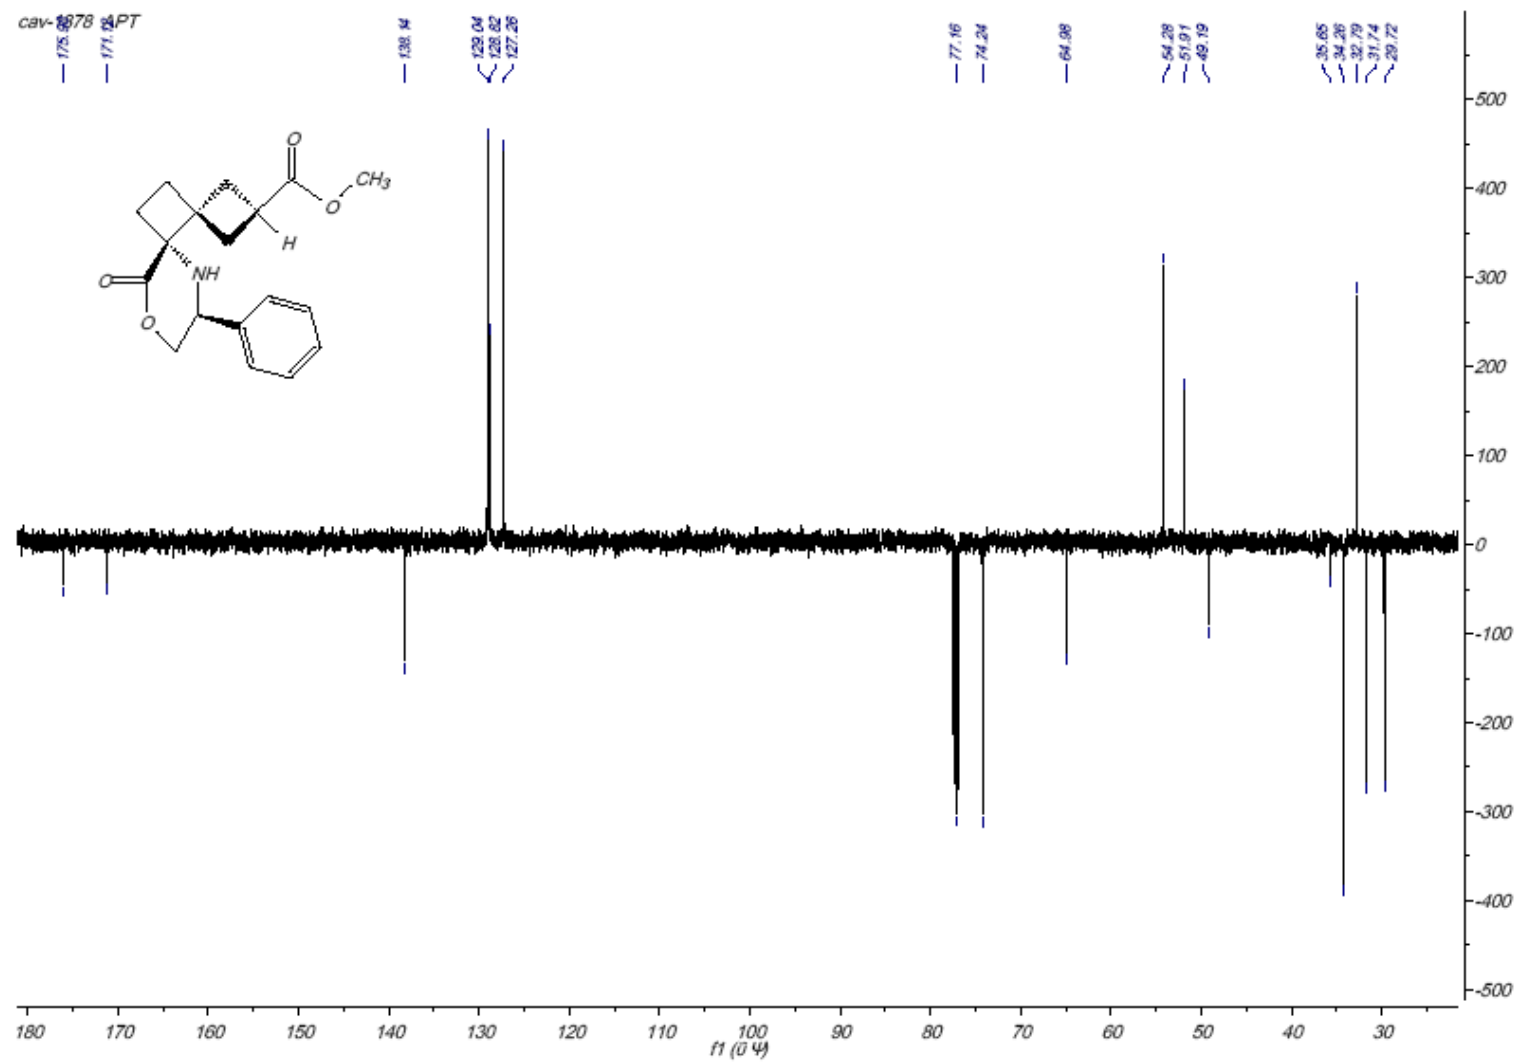

<sup>1</sup>H NMR spectrum of the compound **18b**

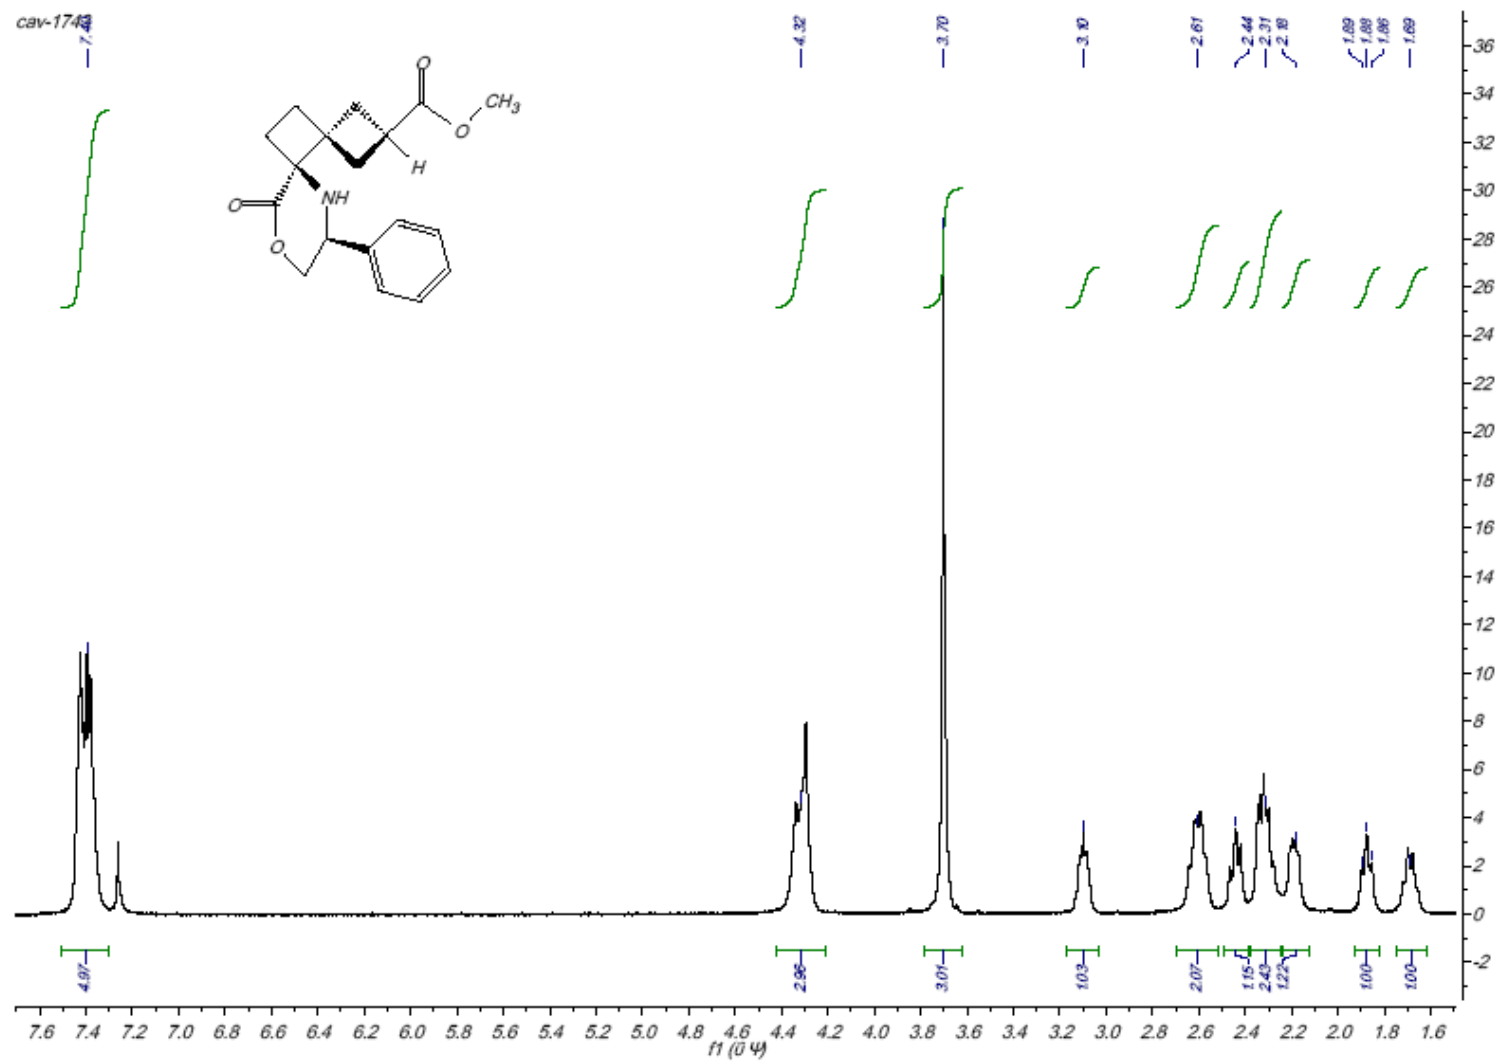

$^{13}\text{C}$  NMR spectrum of the compound **18b**

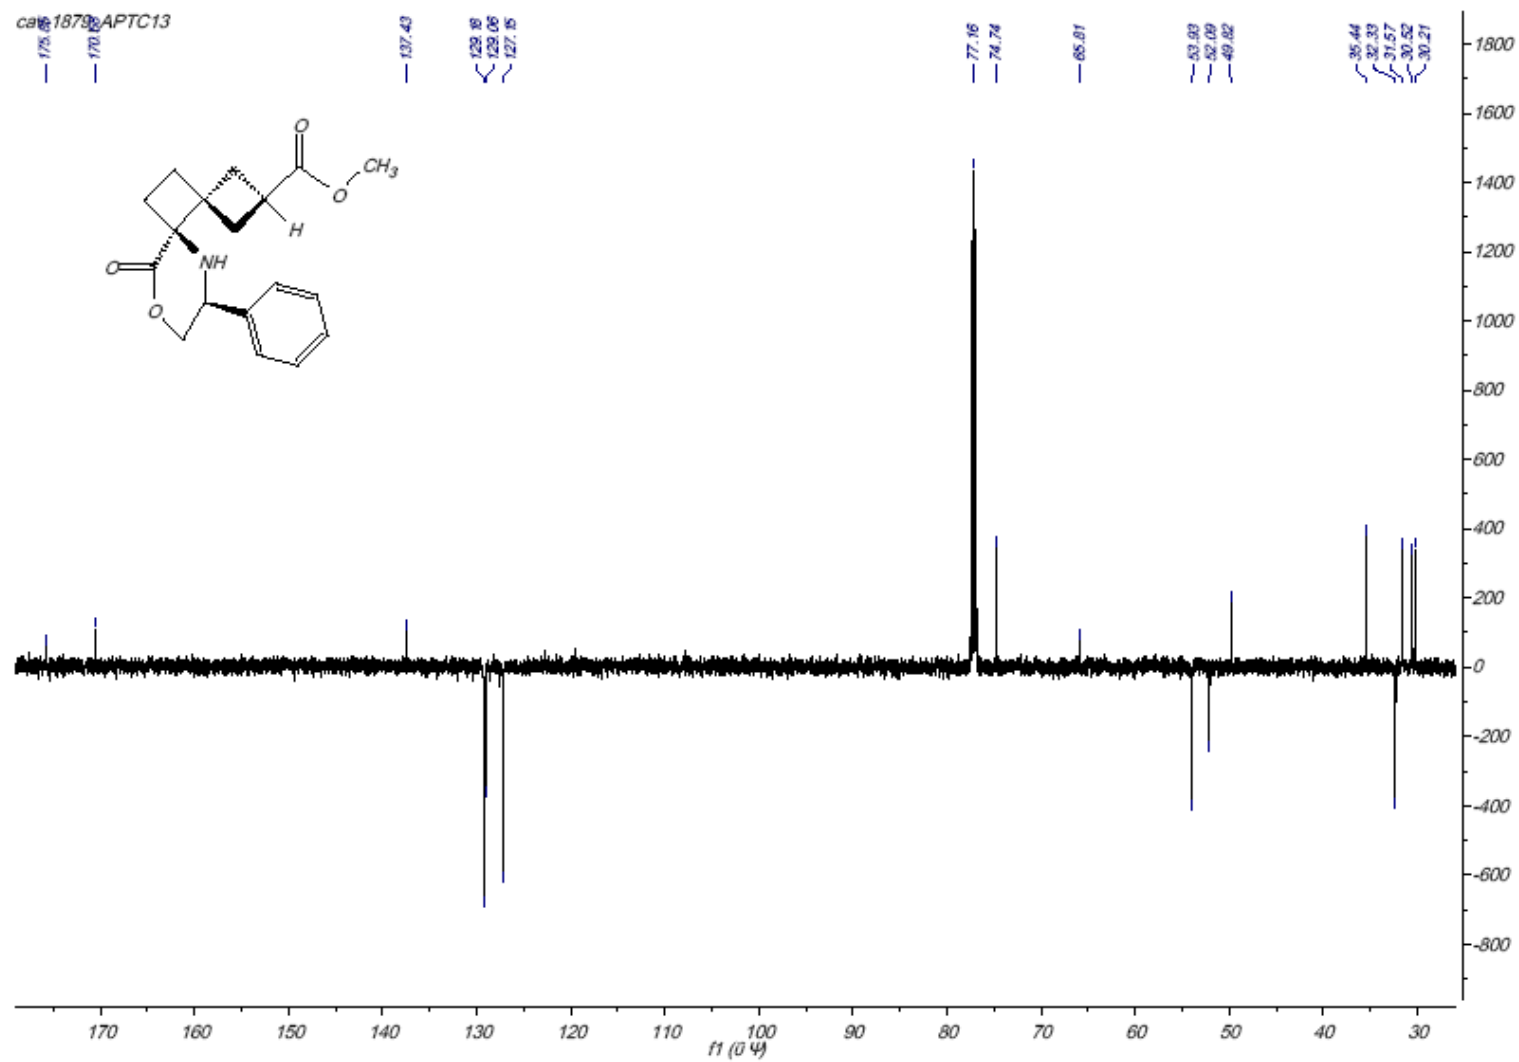

$^1\text{H}$  NMR spectrum of the compound **18c**

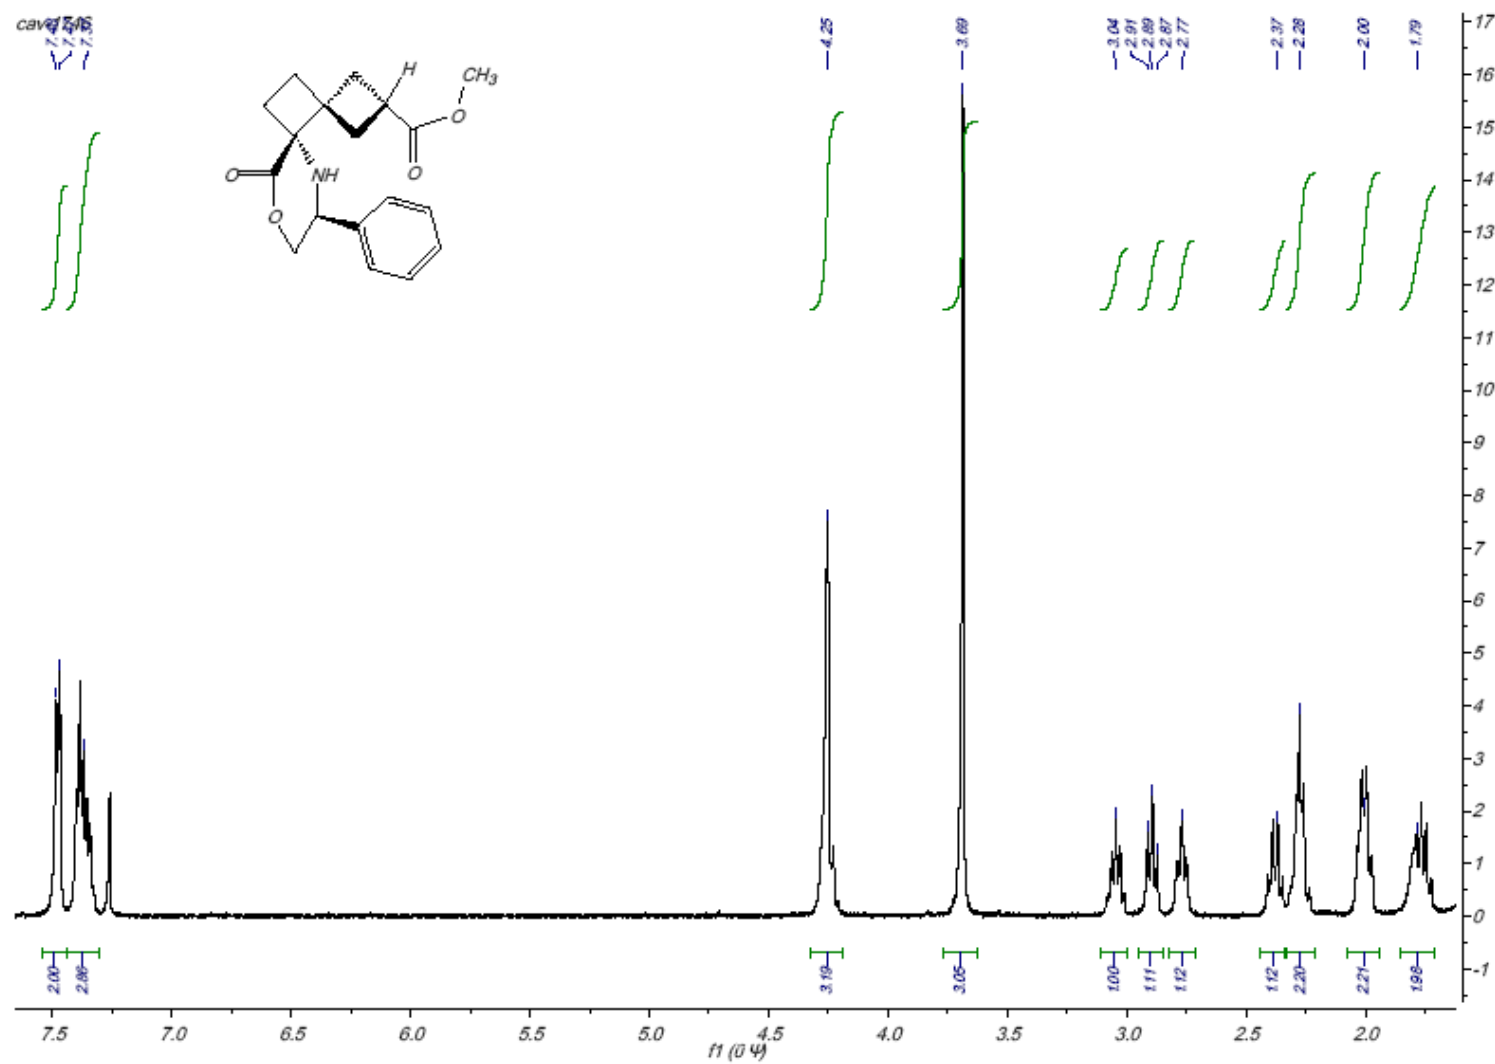



$^{13}\text{C}$  NMR spectrum of the compound **18c**

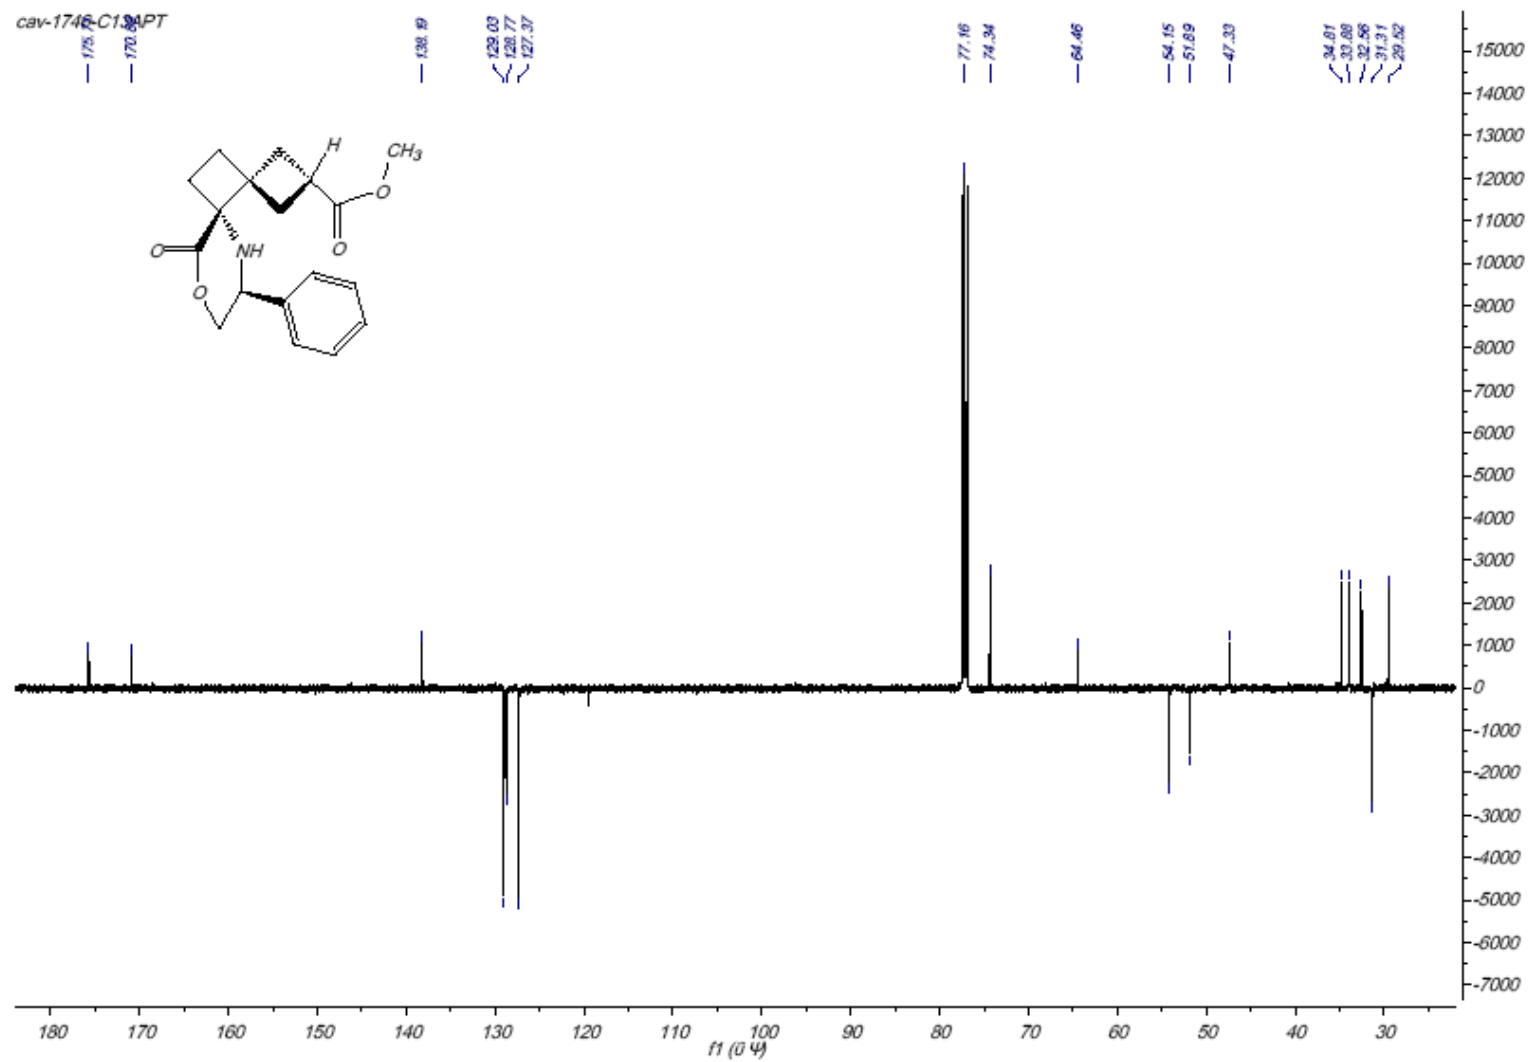

<sup>1</sup>H NMR spectrum of the compound **18d**

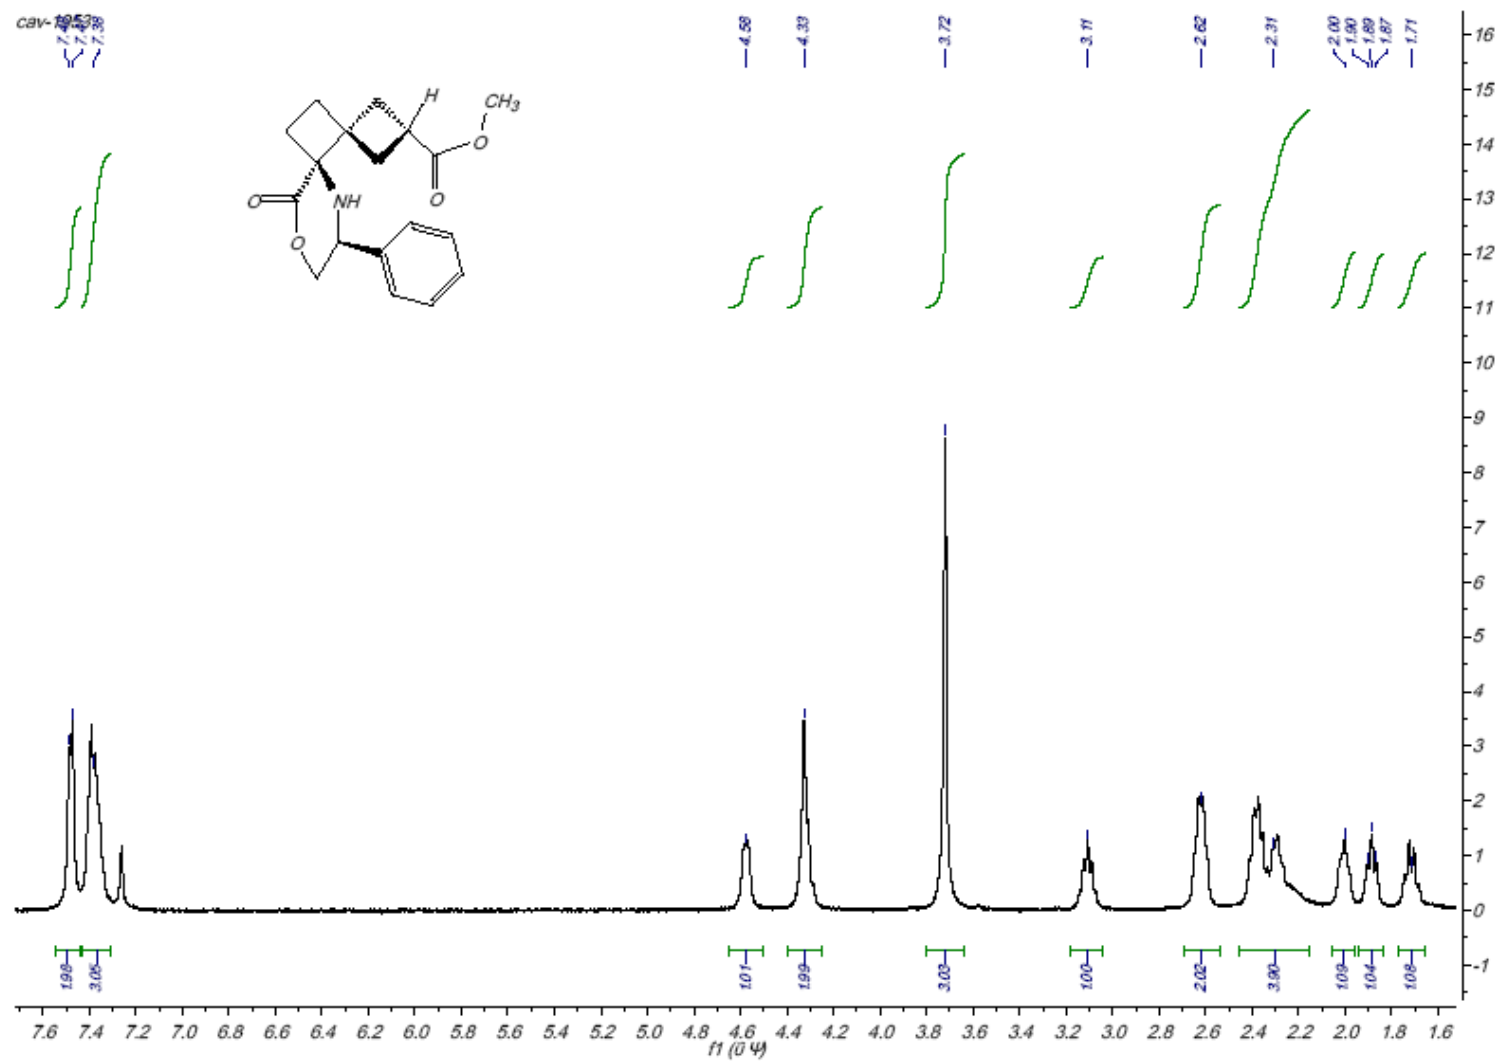

<sup>13</sup>C NMR spectrum of the compound **18d**

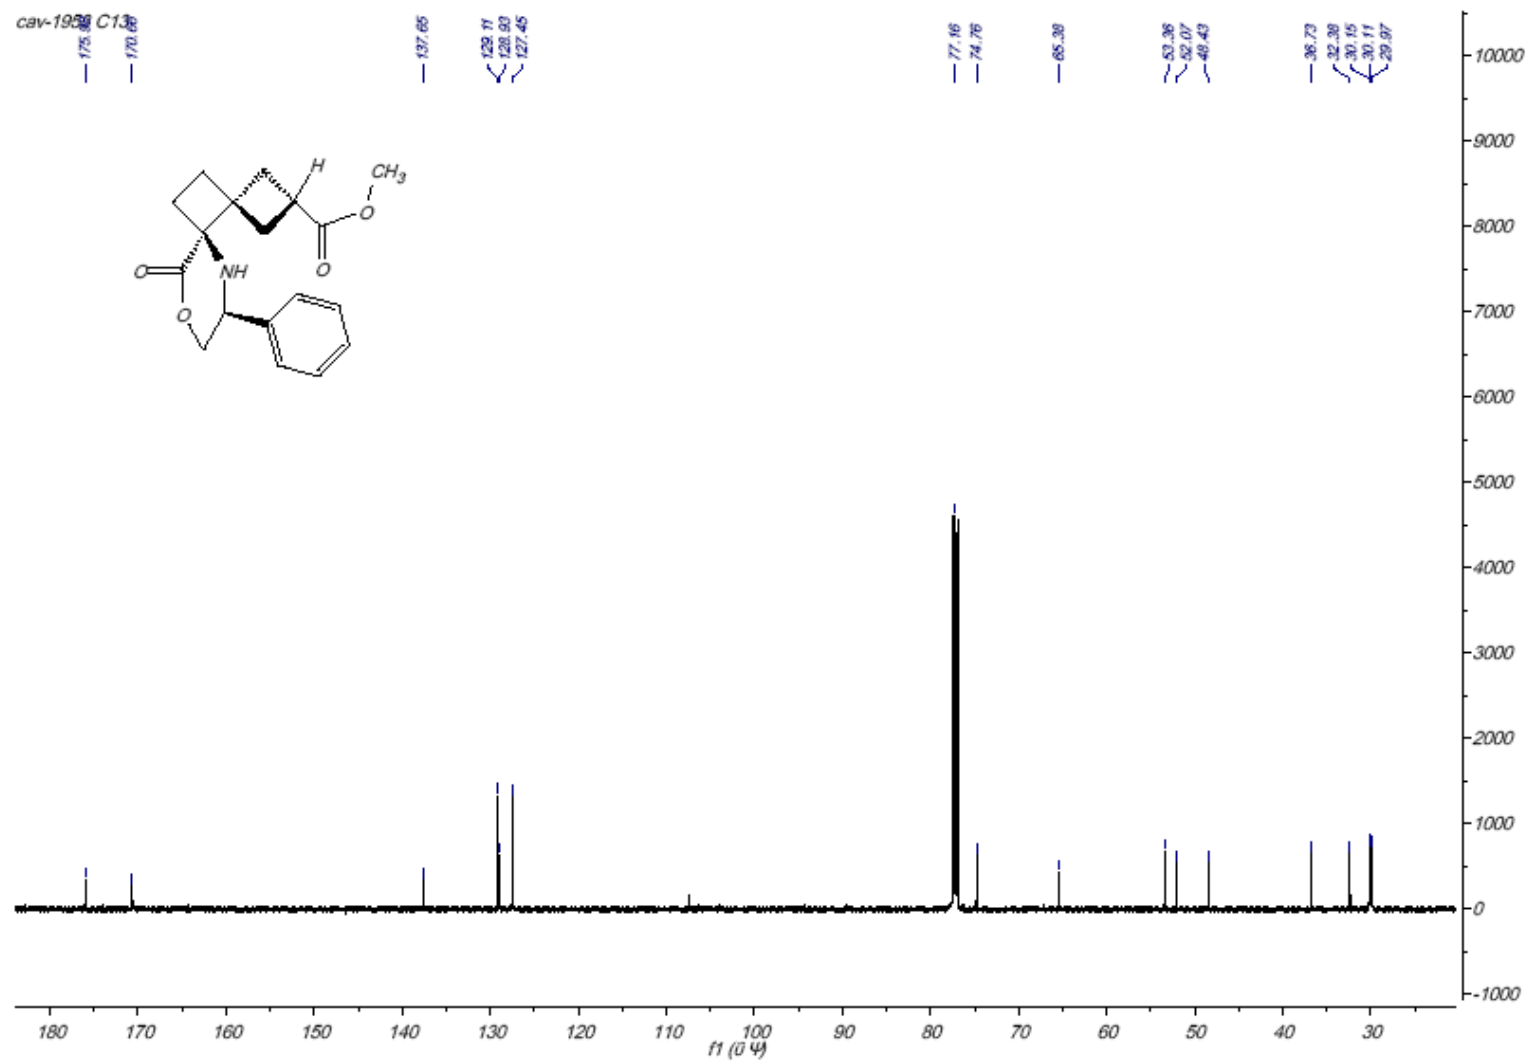

$^{13}\text{C}$  DEPT spectrum of the compound **18d**

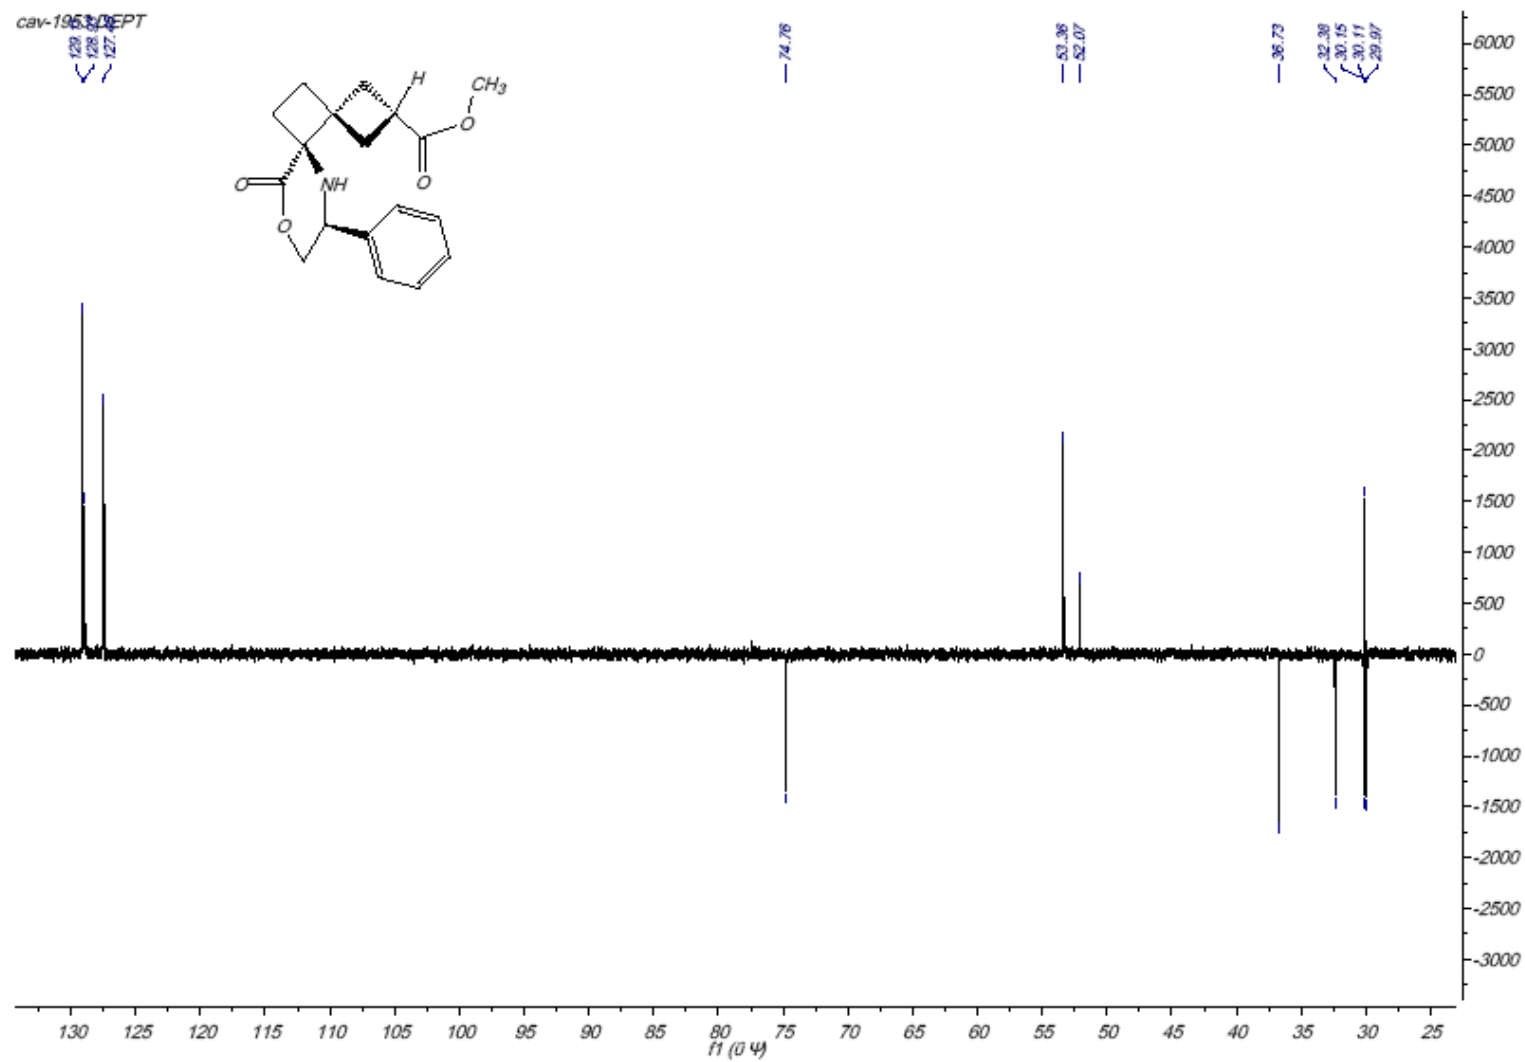

$^1\text{H}$  NMR spectrum of the compound **19c**

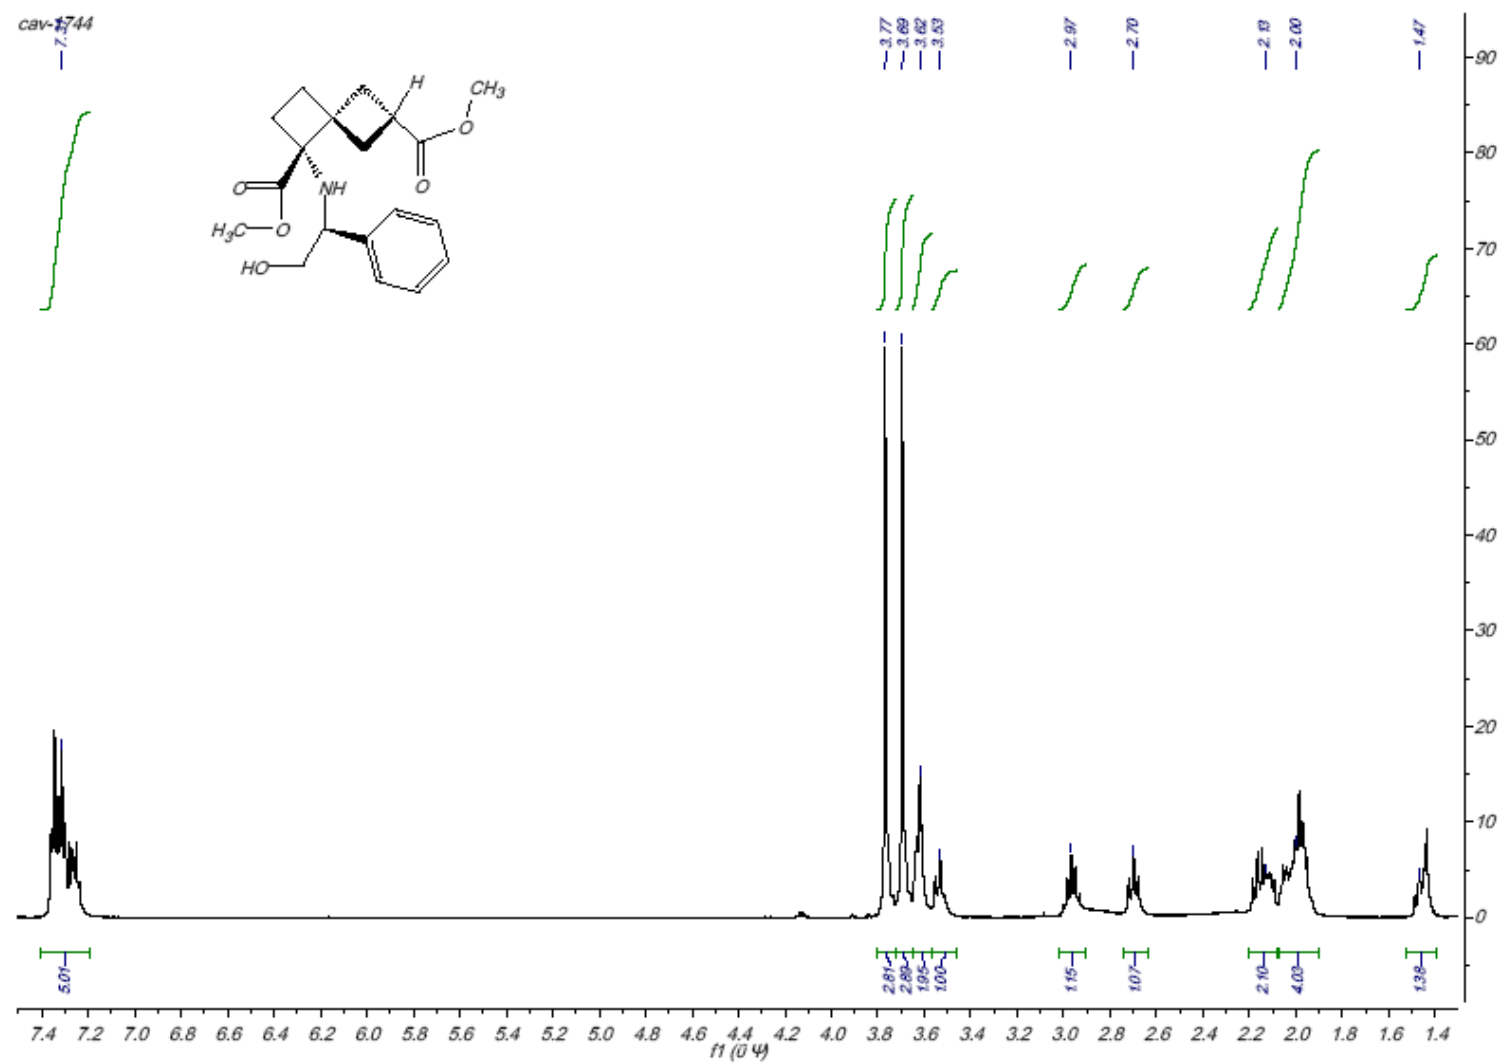

$^{13}\text{C}$  NMR spectrum of the compound **19c**

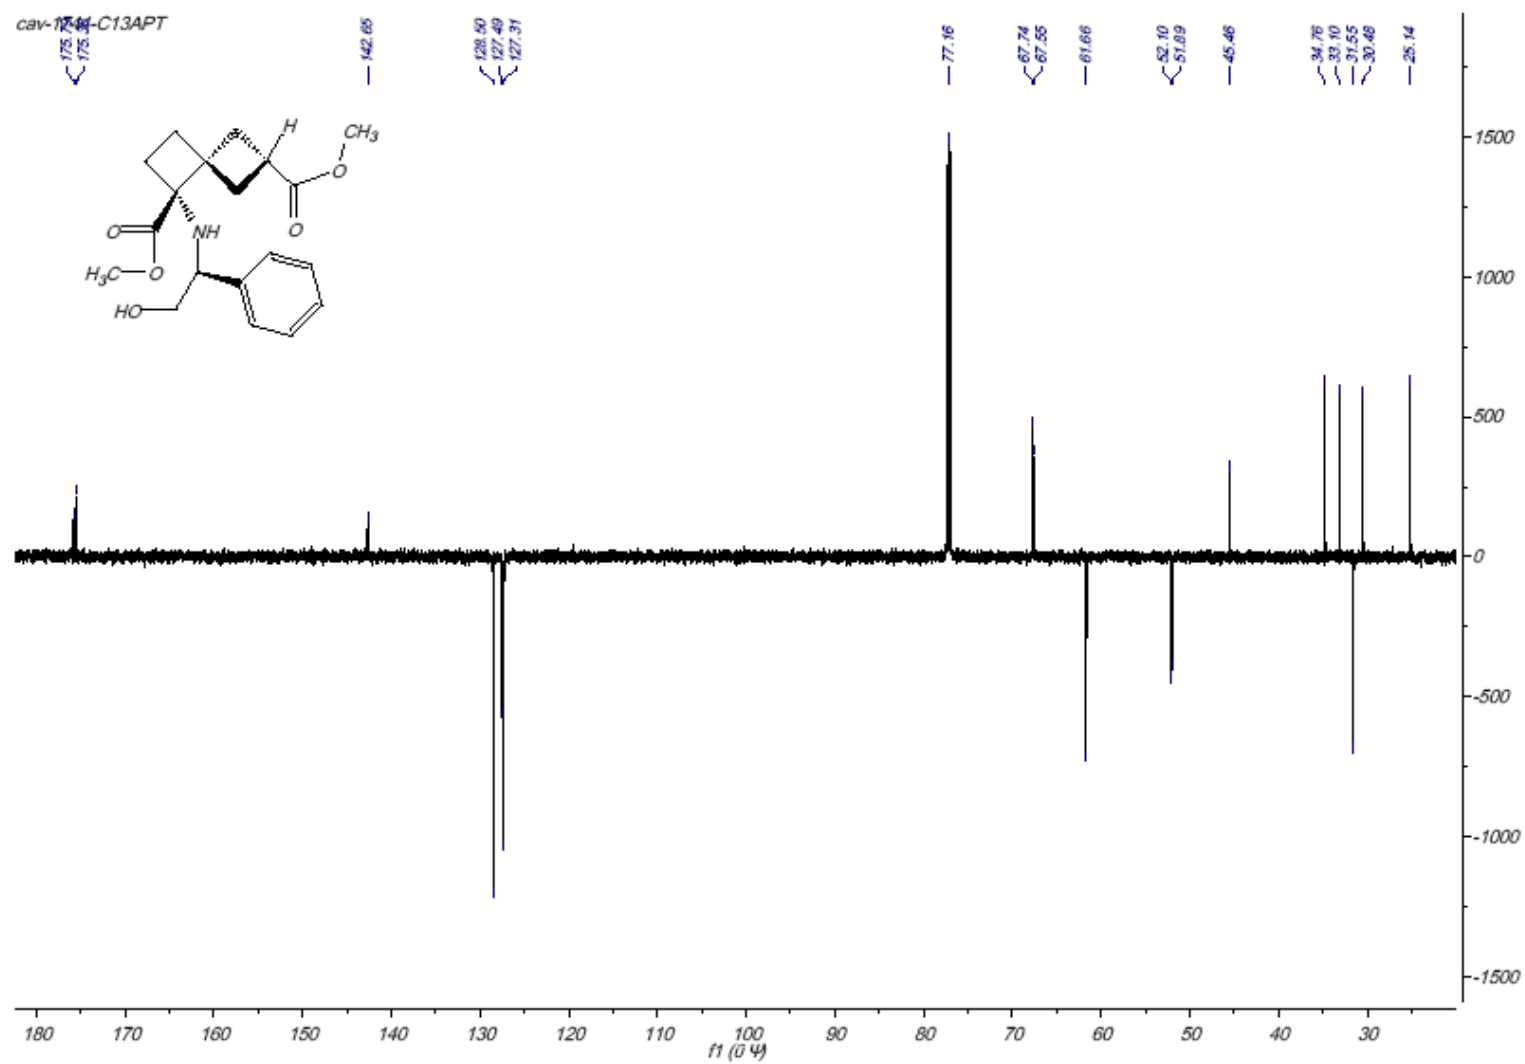

## Stereochemical assignments of **1a-d**

The stereochemical assignment of the final compounds **1a-d** was done basing on several experiments: 1D- and 2D-NOESY for compounds **11a,b** (see above) and X-ray diffractational studies of three purposely synthesized compounds **18a-c**.

Before performing the NOE studies, we assigned the NMR signals in the spectra of **11a,b** using APT, HSQC, H,H-COSY experiments (see the spectra above). The H2 proton (which gives NMR signal at 3.15 ppm for **11a**, 3.08 ppm for **11b**), assigned reliably by its correlation with the C2 in the HSQC (the only tertiary carbon atom, 32.8 ppm for **11a**, 31.9 ppm for **11b**) was irradiated; NOE effect was observed for the proton with the chemical shift 2.54 ppm for **11a** and 2.19-2.34 ppm for **11b**. At the same time, strong NOE correlation was observed in the 2D-NOESY spectra for H7 (1.97 ppm (**11a**) and 2.11 ppm (**11b**)): with the signals H1b in **11a** (2.33 ppm) and H3b in **11b** (2.19-2.34 ppm). From these data we concluded that signals at 2.54 ppm (**11a**) and 2.63-2.77 ppm (**11b**) correspond to H1a and H3a. Hence, the keto-ester **11a** is the *trans*-isomer, because its H2 proton reveals strong NOE with H1a and H3a. Compound **11b** is the *cis*-isomer, because its H2 proton shows strong NOE with H1b and H3b.

The crystallographic data, experimental parameters and CCDB deposition numbers are listed in Table S1. ORTEP diagrams of the compounds **18a-c** illustrate the absolute configuration of the stereocenters in these compounds.

Ideally, X-Ray analysis of all the four derivatives **18a-d** would give us enough information regarding the stereochemistry of **1a-d**, because compounds **16a-d** bear chiral auxiliary with the defined absolute configuration and transformed both into **1a-d** and **18a-d** without racemization at the stereocenters. However, compound **18d** did not give crystals suitable for the X-Ray study. Its absolute stereoconfiguration was deduced using the following reasoning. Compound **18d** is the only diastereomer of the four possible (the chiral auxiliary group was derived from the *S*- $\alpha$ -phenylglycinol for all the diastereomers); its absolute configuration at one of the stereocenter C2 (2*S*) should be the same as in its precursor **11b**, determined by 1D- and 2D-NOESY experiments. The other stereocenter C5 must have the stereoconfiguration reverse to that in its diastereomer **18c**, thus, 5*S*.

**Table S1** Crystallographic data and experimental parameters for the compound **13** and **18a–c**

| Parameter                             | <b>13</b>          | <b>18a</b>                                    | <b>18b</b>                                    | <b>18c</b>      |
|---------------------------------------|--------------------|-----------------------------------------------|-----------------------------------------------|-----------------|
| a, Å                                  | 8.9199(4)          | 6.0940(5)                                     | 6.1255(6)                                     | 10.260(3)       |
| b, Å                                  | 18.9724(8)         | 15.418(2)                                     | 11.218(1)                                     | 5.820(2)        |
| c, Å                                  | 17.167(1)          | 17.637(2)                                     | 24.188(2)                                     | 14.060(4)       |
| $\alpha$ , deg                        | 90.0               | 90.0                                          | 90.0                                          | 90.0            |
| $\beta$ , deg                         | 100.522(5)         | 90.0                                          | 90.0                                          | 98.37(3)        |
| $\gamma$ , deg                        | 90.0               | 90.0                                          | 90.0                                          | 90.0            |
| V, Å <sup>3</sup>                     | 2856.4(3)          | 1657.1(3)                                     | 1662.1(3)                                     | 830.6(5)        |
| T, K                                  | 293(2)             | 293(2)                                        | 293(2)                                        | 293(2)          |
| F(000)                                | 1132               | 672                                           | 672                                           | 336             |
| Crystal system                        | Monoclinic         | Rhombic                                       | Rhombic                                       | Monoclinic      |
| Space group                           | P2 <sub>1</sub> /n | P2 <sub>1</sub> 2 <sub>1</sub> 2 <sub>1</sub> | P2 <sub>1</sub> 2 <sub>1</sub> 2 <sub>1</sub> | P2 <sub>1</sub> |
| Z                                     | 2                  | 4                                             | 4                                             | 2               |
| $\mu$ , mm <sup>-1</sup>              | 0.307              | 0.089                                         | 0.089                                         | 0.089           |
| d <sub>calc</sub> , g/cm <sup>3</sup> | 1.256              | 1.264                                         | 1.260                                         | 1.261           |
| 2 $\Theta$ <sub>max</sub> , deg       | 50                 | 60                                            | 60                                            | 60              |
| Reflection measured                   | 19720              | 8562                                          | 13719                                         | 7469            |
| Reflections independent               | 5018               | 4455                                          | 4755                                          | 4370            |
| R <sub>int</sub>                      | 0.023              | 0.071                                         | 0.102                                         | 0.155           |
| Reflections with F>4 $\sigma$ (F)     | 3827               | 1524                                          | 1883                                          | 836             |
| R <sub>1</sub>                        | 0.098              | 0.048                                         | 0.055                                         | 0.066           |
| wR <sub>2</sub>                       | 0.285              | 0.064                                         | 0.084                                         | 0.159           |
| S                                     | 1.227              | 0.793                                         | 0.840                                         | 0.696           |
| CCDC deposition number                | <b>962474</b>      | <b>962475</b>                                 | <b>962476</b>                                 | <b>962477</b>   |



ORTEP diagrams of the compounds **18a–c**

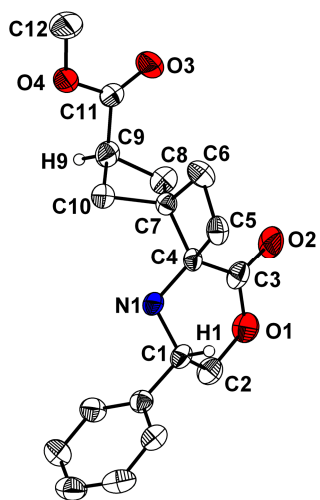

**18a**

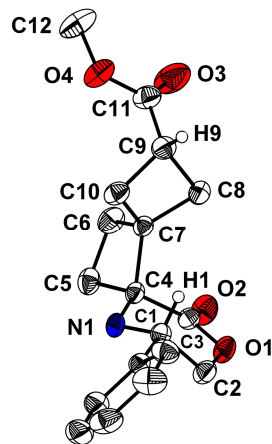

**18b**

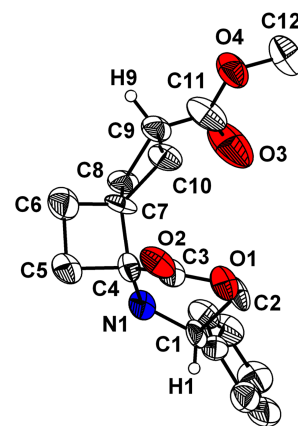

**18c**
